# Supplementary material
Source: PubMed Central journal article supplement (PMC5532877)
Supplement: NIHMS881196-supplement-Supporting_Info.pdf [file NIHMS881196-supplement-Supporting_Info.pdf]

# Supporting Information

for

**Substrate and Lewis Acid Coordination Promote  
O-O Bond Cleavage of an Unreactive  $L_2Cu^{II}_2(O_2^{2-})$   
Species to Form  $L_2Cu^{III}_2(O)_2$  Cores with Enhanced  
Oxidative Reactivity.**

Isaac Garcia-Bosch,\* Ryan E. Cowley, Daniel E. Díaz, Ryan L. Peterson, Edward I.  
Solomon\* and Kenneth D. Karlin\*

## 1. UV-Vis experiments.

### 1.1 Reaction of $[(\text{MeAN})_2\text{Cu}_2(\text{O}_2^{2-})]^{2+}$ towards external substrates.

3 mL of a  $[(\text{MeAN})\text{Cu}^{\text{I}}](\text{BAR}^{\text{F}})$  solution (0.2 mM) in acetone were placed in a 10 mm path quartz cell equipped with a stir bar and it was capped with a rubber septum. After cooling down the cell to  $-90\text{ }^\circ\text{C}$ , dioxygen was added to generate the corresponding  $[(\text{MeAN})_2\text{Cu}^{\text{II}}_2(\text{O}_2^{2-})]^{2+}$  ( $\text{S}^{\text{P}^{\text{MeAN}}}$ ) ( $\lambda_{\text{max}}$ : 365 nm;  $\epsilon = 22\text{ mM}^{-1}\text{ cm}^{-1}$ ). After complete formation, 100  $\mu\text{L}$  of an acetone solution containing excess of the corresponding substrate were added. No spectral change was observed with substituted phenols,  $\text{PPh}_3$ , DHA, thioanisole,  $\text{Me}_2\text{Fc}$ , or Fc within 30 minutes after substrate addition. On the other hand, addition of  $\text{Me}_8\text{Fc}$  or  $\text{Me}_{10}\text{Fc}$  (10 equiv.) led to decay of the  $\text{S}^{\text{P}^{\text{MeAN}}}$  UV-Vis features with concomitant formation of 1 equiv. of the corresponding  $\text{Me}_n\text{Fc}^+$  (**Figure S1**). NOTE: the formation of only one equiv. suggests a disproportionation reaction.

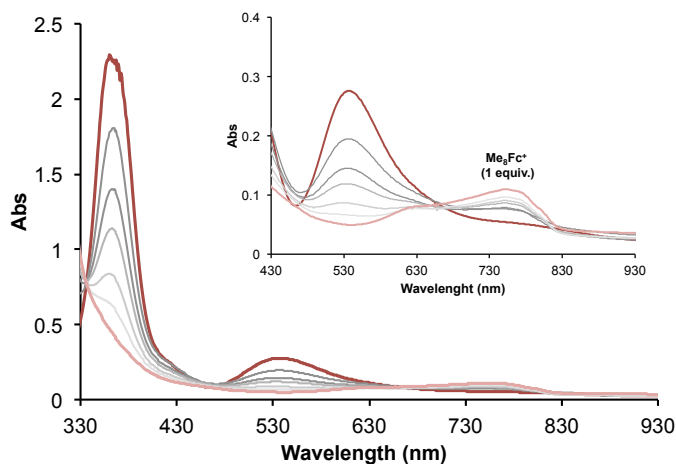

**Figure S1.** UV-vis spectra for the  $1\text{e}^-$  reduction of  $\text{S}^{\text{P}^{\text{MeAN}}}$  (brown spectrum) by  $\text{Me}_{10}\text{Fc}$  (10 equiv). The decay of  $\text{S}^{\text{P}^{\text{MeAN}}}$  features concluded 1 minute after the addition of the reductant with concomitant formation of 1 equiv. of  $\text{Me}_{10}\text{Fc}^+$  (pink spectrum).

### 1.2 Reaction of $[(\text{MeAN})_2\text{Cu}_2(\text{O}_2^{2-})]^{2+}$ with substituted sodium phenolates (4- $\text{NO}_2$ , 4- $\text{CN}$ , 4- $\text{Cl}$ , 4- $\text{Me}$ , 4- $\text{MeO}$ and 2,6- $\text{F}_2$ )

2.9 mL of a  $[(\text{MeAN})\text{Cu}^{\text{I}}](\text{BAR}^{\text{F}})$  solution (0.1 mM) in acetone were placed in a 10 mm path quartz cell equipped with a stir bar and it was capped with a rubber septum. After cooling down the cell to  $-90\text{ }^\circ\text{C}$ , dioxygen was added to generate the corresponding  $[(\text{MeAN})_2\text{Cu}^{\text{II}}_2(\text{O}_2^{2-})]^{2+}$  (0.05 mM). After complete formation, 100  $\mu\text{L}$  of an acetone solution containing the corresponding 4-substituted sodium phenolate were added (0.2 mM). Initial formation of a putative  $[(\text{MeAN})_2\text{Cu}^{\text{III}}_2(\text{O}_2^{2-})(\text{R-PhO}^-)]^+$  was observed followed by its decay (**Figures S3-S7**). Kinetic analysis was performed by fitting the exponential decay of  $[(\text{MeAN})_2\text{Cu}^{\text{III}}_2(\text{O}_2^{2-})(\text{R-PhO}^-)]^+$  at 400 nm. Pseudo-first-order rate constants  $k_{\text{obs}}$  obtained for each substrate are summarized in **Table S1** and plotted in **Figure S2** (Hammett plot). Note: the reaction rates ( $k_{\text{obs}}$ ) were plotted against  $\sigma^+$ . When  $k_{\text{obs}}$  was plotted against  $\sigma$ , a poor linear correlation was observed, confirming the proposed mechanism in which during the rate determining step, electrophilic attack of the  $\text{Cu}_2\text{O}_2$  to the arene leads to formation of a carbocation intermediate. This analysis has also been previously carried out in the reactivity of other  $\text{Cu}_2\text{O}_2$  species towards phenolates (see references S1-S4).<sup>1-4</sup>

**Table S1.** Summary of kinetic experiments for the reactivity of  $\text{S}^{\text{P}^{\text{MeAN}}}$  towards substituted sodium phenolates.

| R-PhO <sup>-</sup> | $\sigma_p^+$ | [R-PhO] <sub>0</sub> (mM) | $k_{\text{obs}}$ (s <sup>-1</sup> ) |
|--------------------|--------------|---------------------------|-------------------------------------|
| 4-MeO              | -0.778       | 0.2                       | 0.29 ± 0.02                         |
| 4-Me               | -0.31        | 0.2                       | 0.082 ± 0.003                       |
| 4-Cl               | 0.114        | 0.2                       | 0.039 ± 0.004                       |
| 4-CN               | 0.659        | 0.2                       | 0.0061 ± 0.0001                     |
| 2,6-F <sub>2</sub> | -            | 0.2                       | 0.00194 ± 0.0004                    |

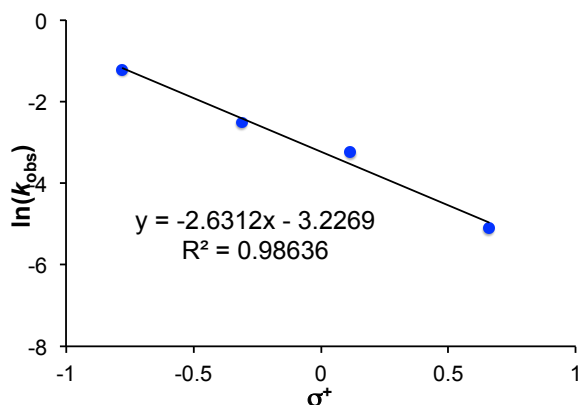

**Figure S2.** Hammett plot ( $\ln(k_{\text{obs}})$  vs.  $\sigma_p^+$ ) for the reaction of  $\text{S}^{\text{P}^{\text{MeAN}}}$  (0.05 mM) towards 4-substituted phenolates (see Table S1).<sup>1-4</sup>

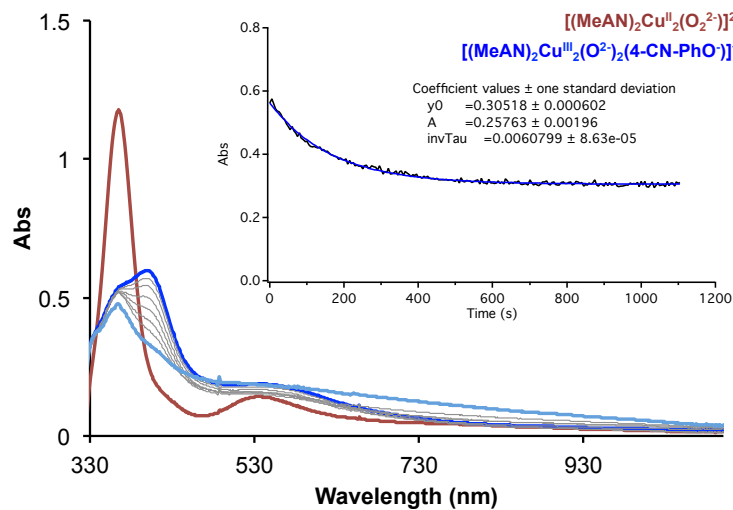

**Figure S3.** UV-vis spectra for the reaction of  $\text{S}^{\text{P}^{\text{MeAN}}}$  (0.05 mM) (brown spectrum) towards 4-CN-phenolate (0.2 mM) to form the  $[(\text{MeAN})_2\text{Cu}^{\text{III}}_2(\text{O}^{2-})_2(4\text{-CN-PhO}^-)]^+$  (blue spectrum). Inset: kinetic traces (400 nm) for the decay of  $[(\text{MeAN})_2\text{Cu}^{\text{III}}_2(\text{O}^{2-})_2(4\text{-CN-PhO}^-)]^+$ .

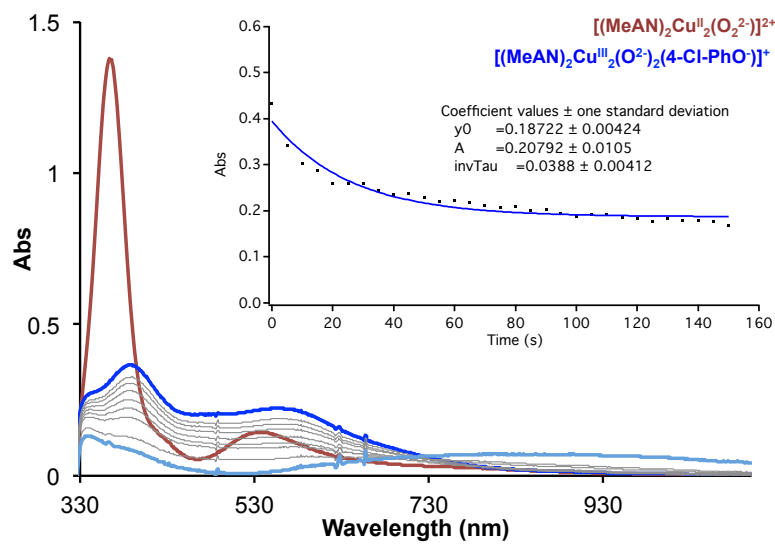

**Figure S4.** UV-vis spectra for the reaction of  $\text{SP}^{\text{MeAN}}$  (0.05 mM) (**brown spectrum**) towards 4-Cl-phenolate (0.2 mM) to form the  $[(\text{MeAN})_2\text{Cu}^{\text{III}}(\text{O}^{2-})_2(4\text{-Cl-PhO}^-)]^+$  (**blue spectrum**). Inset: kinetic traces (400 nm) for the decay of  $[(\text{MeAN})_2\text{Cu}^{\text{II}}(\text{O}^{2-})_2(4\text{-Cl-PhO}^-)]^+$ .

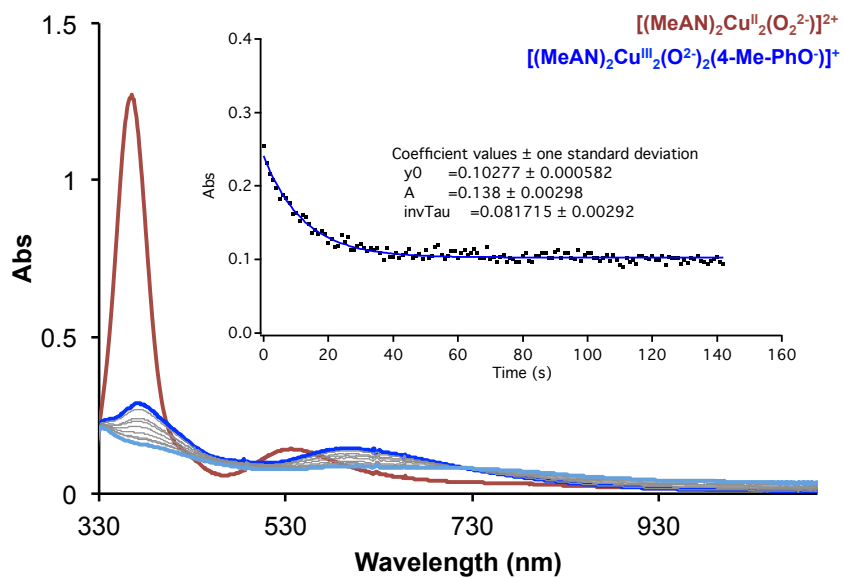

**Figure S5.** UV-vis spectra for the reaction of  $\text{SP}^{\text{MeAN}}$  (0.05 mM) (**brown spectrum**) towards 4-Me-phenolate (0.2 mM) to form the  $[(\text{MeAN})_2\text{Cu}^{\text{III}}(\text{O}^{2-})_2(4\text{-Me-PhO}^-)]^+$  (**blue spectrum**). Inset: kinetic traces (400 nm) for the decay of  $[(\text{MeAN})_2\text{Cu}^{\text{II}}(\text{O}^{2-})_2(4\text{-Me-PhO}^-)]^+$ .

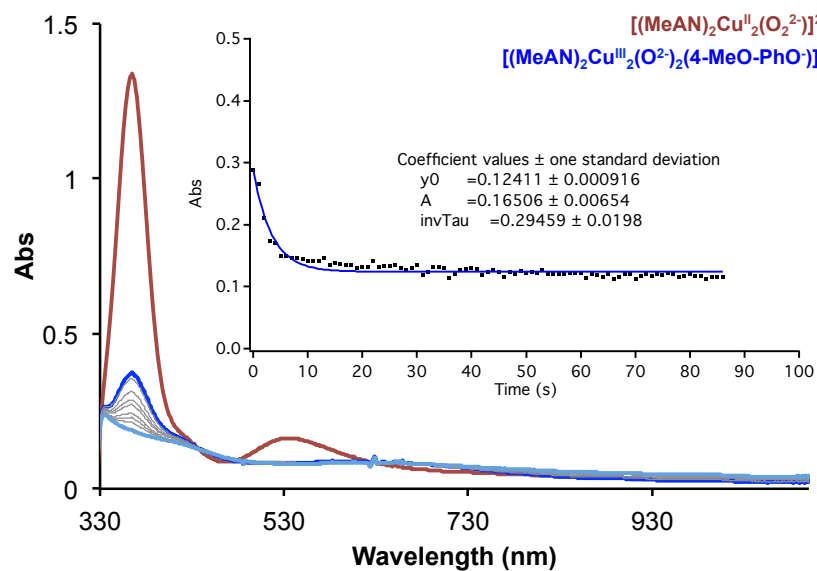

**Figure S6.** UV-vis spectra for the reaction of  $\text{SP}^{\text{MeAN}}$  (0.05 mM) (brown spectrum) towards 4-MeO-phenolate (0.2 mM) to form the  $[(\text{MeAN})_2\text{Cu}^{\text{III}}_2(\text{O}^{2-})_2(4\text{-MeO-PhO})]^+$  (blue spectrum). Inset: kinetic traces (400 nm) for the decay of  $[(\text{MeAN})_2\text{Cu}^{\text{III}}_2(\text{O}^{2-})_2(4\text{-MeO-PhO})]^+$ .

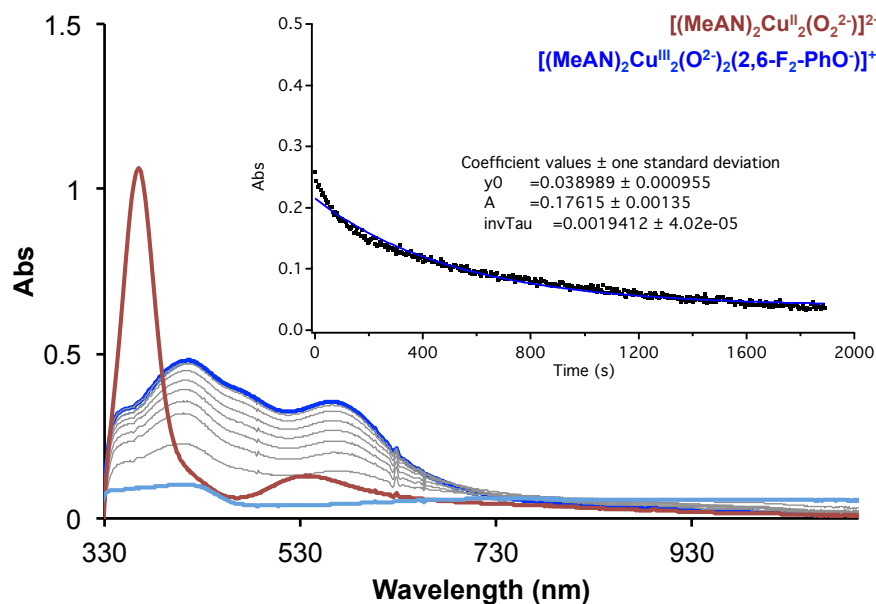

**Figure S7.** UV-vis spectra for the reaction of  $\text{SP}^{\text{MeAN}}$  (0.05 mM) (brown spectrum) towards 2,6-F<sub>2</sub>-phenolate (0.2 mM) to form the  $[(\text{MeAN})_2\text{Cu}^{\text{III}}_2(\text{O}^{2-})_2(2,6\text{-F}_2\text{-PhO})]^+$  (blue spectrum). Inset: kinetic traces (400 nm) for the decay of  $[(\text{MeAN})_2\text{Cu}^{\text{III}}_2(\text{O}^{2-})_2(2,6\text{-F}_2\text{-PhO})]^+$ . Note: slight deviation of the kinetic trace observed (400 nm) from the calculated exponential decay fit is attributed to the slow accumulation of the  $[(\text{MeAN})_2\text{Cu}^{\text{III}}_2(\text{O}^{2-})_2(2,6\text{-F}_2\text{-PhO})]^+$  during the first 50 seconds of reaction coupled with its decay (i.e., formation of  $[(\text{MeAN})_2\text{Cu}^{\text{III}}_2(\text{O}^{2-})_2(2,6\text{-F}_2\text{-PhO})]^+$  and its decay have similar reaction rates).

### 1.3 Generation of Lewis acid adducts of $[(\text{MeAN})_2\text{Cu}_2(\text{O}_2^{2-})]^{2+}$ ( $\text{O}^{\text{MeAN}}\text{-LA}$ )

3 mL of a  $[(\text{MeAN})\text{Cu}]^+(\text{BAr}^{\text{F}})$  solution (0.2 mM) in acetone were placed in a 10 mm path quartz cell equipped with a stir bar and capped with a rubber septum. After cooling the cell to  $-90\text{ }^\circ\text{C}$ ,  $\text{O}_2$  was added to generate the corresponding  $\text{S}^{\text{P}^{\text{MeAN}}}$  ( $\lambda_{\text{max}}$ : 365 nm;  $\epsilon = 22\text{ mM}^{-1}\text{ cm}^{-1}$ ). After complete formation, 100  $\mu\text{L}$  of an acetone solution containing the corresponding equivalents of Lewis acids (0.2 mM  $\text{DMF}\cdot\text{CF}_3\text{SO}_3\text{H}$ , 0.1 mM  $\text{Sc}(\text{CF}_3\text{SO}_3)_3$ , or 0.1 mM  $\text{B}(\text{C}_6\text{F}_5)_3$ ) were added to generate the corresponding ( $\text{O}^{\text{MeAN}}\text{-LA}$ ) species (Figure S8). NOTE: addition of  $(\text{NBu}_4^+)(\text{CF}_3\text{SO}_3^-)$  didn't lead to the isomerization of the  $\text{S}^{\text{P}^{\text{MeAN}}}$  to the  $\text{O}$  species.

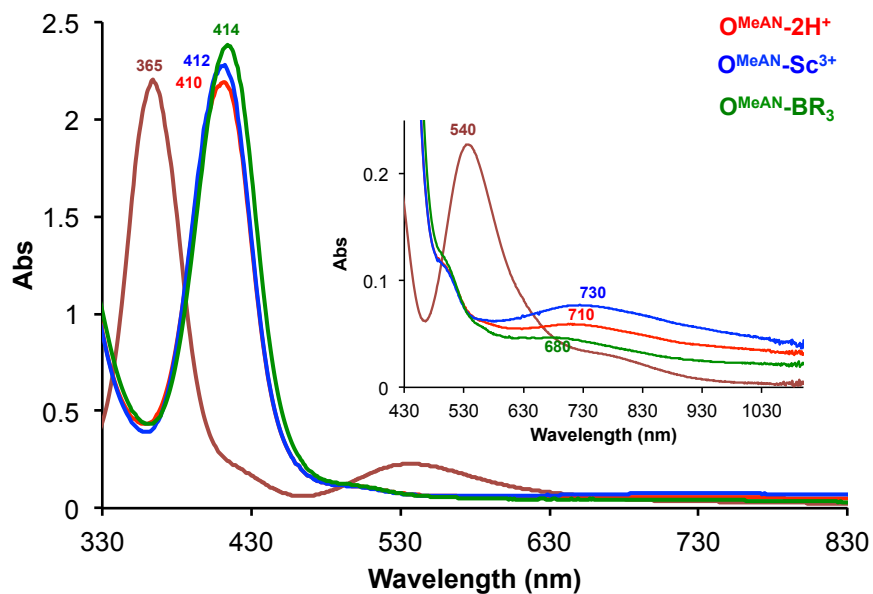

**Figure S8.** UV-vis spectra of  $\text{S}^{\text{P}^{\text{MeAN}}}$  (brown) and the different  $\text{O}^{\text{MeAN}}\text{-LA}$  species  $\text{O}^{\text{MeAN}}\text{-2H}^+$  (red),  $\text{O}^{\text{MeAN}}\text{-Sc}^{3+}$  (blue), and  $\text{O}^{\text{MeAN}}\text{-2BR}_3$  (green).

#### 1.4 Lewis Acid titration and reversibility experiments

1.4.1  $\text{O}^{\text{MeAN}}\text{-2H}^+$ : After formation of  $\text{S}^{\text{P}^{\text{MeAN}}}$  (0.1 mM,  $-90\text{ }^\circ\text{C}$ ), consecutive additions of sub-stoichiometric and stoichiometric amounts of  $\text{DMF}\cdot\text{CF}_3\text{SO}_3\text{H}$  (0.05 – 0.2 mM) were added, observing full formation of  $\text{O}^{\text{MeAN}}\text{-2H}^+$  ( $\lambda_{\text{max}}$ : 410 nm;  $\epsilon = 21\text{ mM}^{-1}\text{ cm}^{-1}$ ). NOTE: addition of excess amounts of  $\text{DMF}\cdot\text{CF}_3\text{SO}_3\text{H}$  (up to 1 mM) led to the slow decomposition of  $\text{O}^{\text{MeAN}}\text{-2H}^+$ .

Formation of  $\text{O}^{\text{MeAN}}\text{-2H}^+$  could be reversed by addition of proton sponge (1,8-bis(dimethylamino)naphthalene) in excess (0.6 mM) leading to full regeneration of  $\text{S}^{\text{P}^{\text{MeAN}}}$  (Figure S9).  $\text{O}^{\text{MeAN}}\text{-2H}^+$  could be formed again by re-addition of  $\text{DMF}\cdot\text{CF}_3\text{SO}_3\text{H}$  (0.6 mM) were required in order to full formation, due to the presence of proton sponge excess in solution).

Note: addition of excess equivalents of  $\text{Na}(\text{CF}_3\text{SO}_3)$  did not lead to any spectral change associated with O-O bond cleavage.

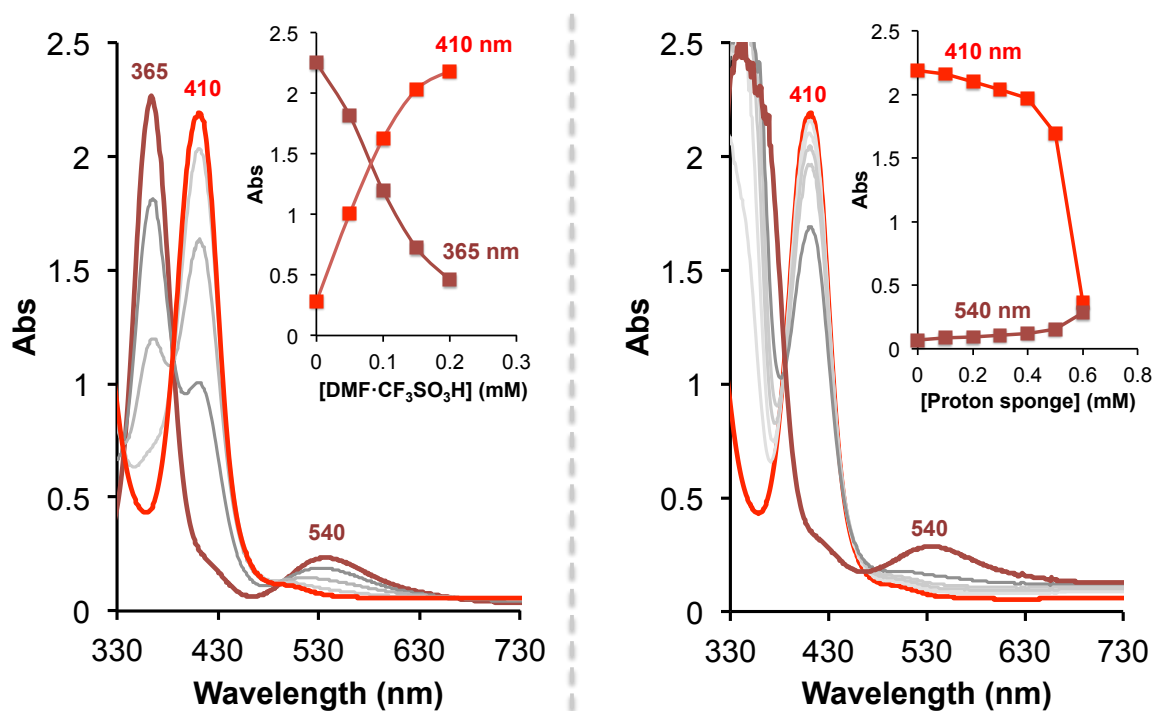

**Figure S9.** Titration (left) and reversibility experiments (right) of the  $\text{S}^{\text{P}^{\text{MeAN}}}/\text{O}^{\text{MeAN}}\text{-2H}^+$  equilibrium (see above for experimental details).

1.4.2  $\text{O}^{\text{MeAN}}\text{-Sc}^{3+}$ : After formation of  $\text{S}^{\text{P}^{\text{MeAN}}}$  (0.1 mM,  $-90\text{ }^{\circ}\text{C}$ ), consecutive additions of sub-stoichiometric and stoichiometric amounts of  $\text{Sc}(\text{CF}_3\text{SO}_3)_3$  (0.025 – 0.15 mM) were added, observing full formation of  $\text{O}^{\text{MeAN}}\text{-Sc}^{3+}$  ( $\lambda_{\text{max}}$ : 412 nm;  $\epsilon = 23\text{ mM}^{-1}\text{ cm}^{-1}$ ).

Formation of  $\text{O}^{\text{MeAN}}\text{-Sc}^{3+}$  could be reversed by addition of 1,10-phenanthroline in excess (0.8 mM), leading only to partial formation (75%) of  $\text{S}^{\text{P}^{\text{MeAN}}}$  (Figure S10) due to the ability of 1,10-phenanthroline to trap Cu(I) (430 and 455 nm bands, see Figure S10).  $\text{O}^{\text{MeAN}}\text{-Sc}^{3+}$  could be partially formed again by re-addition of  $\text{Sc}(\text{CF}_3\text{SO}_3)_3$  (0.2 mM were required in order to full formation, due to the presence of excess 1,10-phenanthroline in solution).

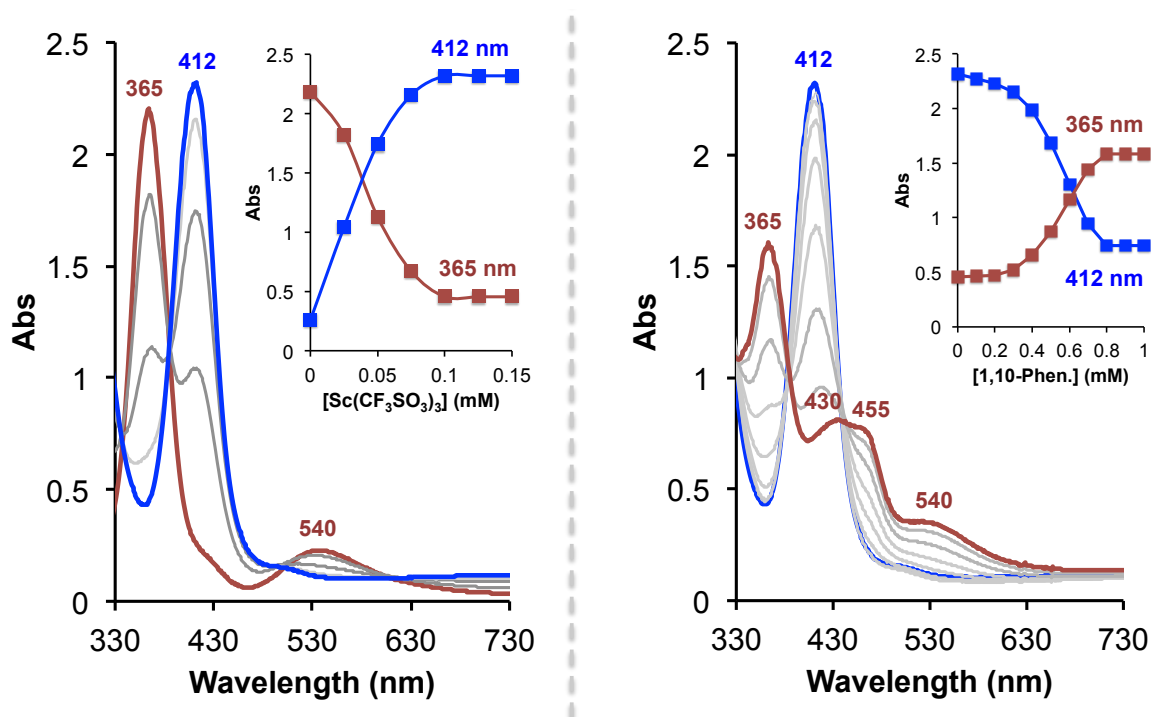

**Figure S10.** Titration (left) and reversibility experiments (right) of the  $\text{S}^{\text{P}^{\text{MeAN}}}/\text{O}^{\text{MeAN}}\text{-Sc}^{3+}$  equilibrium (see above for experimental details).



1.4.3  $\text{O}^{\text{MeAN}}\text{-2BR}_3$ : After formation of  $\text{S}^{\text{P}^{\text{MeAN}}}$  (0.1 mM,  $-90\text{ }^\circ\text{C}$ ), consecutive additions of sub-stoichiometric and stoichiometric amounts of  $\text{B}(\text{C}_6\text{F}_5)_3$  (0.05 – 0.30 mM) were added, observing full formation of  $\text{O}^{\text{MeAN}}\text{-2BR}_3$  ( $\lambda_{\text{max}}$ : 414 nm,;  $\epsilon = 24\text{ mM}^{-1}\text{ cm}^{-1}$ ).

Formation of  $\text{O}^{\text{MeAN}}\text{-2BR}_3$  could be reversed by addition of TASF (tris(dimethylamino)sulfonium difluorotrimethylsilicate) in excess (0.6 mM), leading only to partial formation (60%) of  $\text{S}^{\text{P}^{\text{MeAN}}}$  (**Figure S11**). However,  $\text{O}^{\text{MeAN}}\text{-2BR}_3$  could be partially formed again by re-addition of  $\text{B}(\text{C}_6\text{F}_5)_3$ .

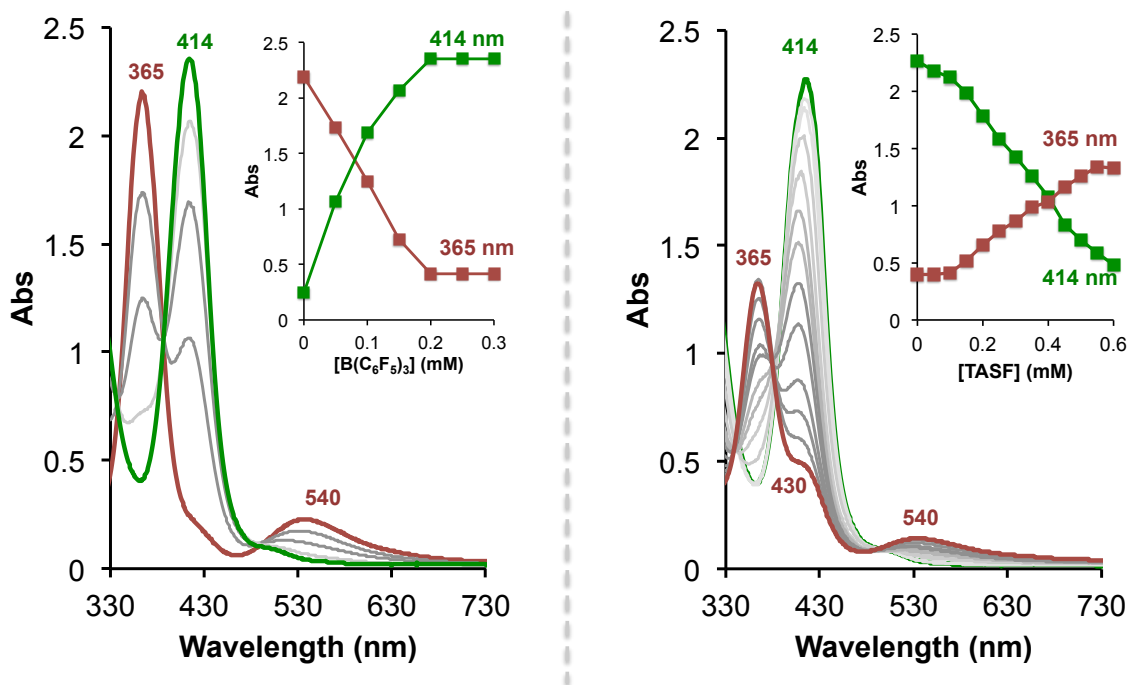

**Figure S11.** Titration (left) and reversibility experiments (right) of the  $\text{S}^{\text{P}^{\text{MeAN}}}/\text{O}^{\text{MeAN}}\text{-2BR}_3$  equilibrium (see above for experimental details).

### 1.5 Reactivity of $O^{\text{MeAN}}\text{-LA}$ towards external substrates

After generation of the corresponding ( $O^{\text{MeAN}}\text{-LA}$ ) as described above (Section 2.3), 100  $\mu\text{L}$  of an acetone solution containing excess of the corresponding substrate ( $\text{PPh}_3$ , DHA, thioanisole, and  $\text{Fc}(\text{e}^-)$ ) were added. No spectral change was observed, not even 30 minutes after substrate addition. On the other hand, addition of  $\text{Me}_{10}\text{Fc}$ ,  $\text{Me}_8\text{Fc}$  or  $\text{Me}_2\text{Fc}$  ( $\text{S}^{\text{P}^{\text{MeAN}}}$  was not able to be reduced by  $\text{Me}_2\text{Fc}$ ) led to decay of the UV-vis features of the ( $O^{\text{MeAN}}\text{-LA}$ ) cores (**Figure S12**). NOTE: the formation of only one equiv. of  $\text{Me}_2\text{Fc}^+$  and regeneration of 0.5 equiv. of  $\text{S}^{\text{P}^{\text{MeAN}}}$  suggests a disproportionation reaction after electron transfer.

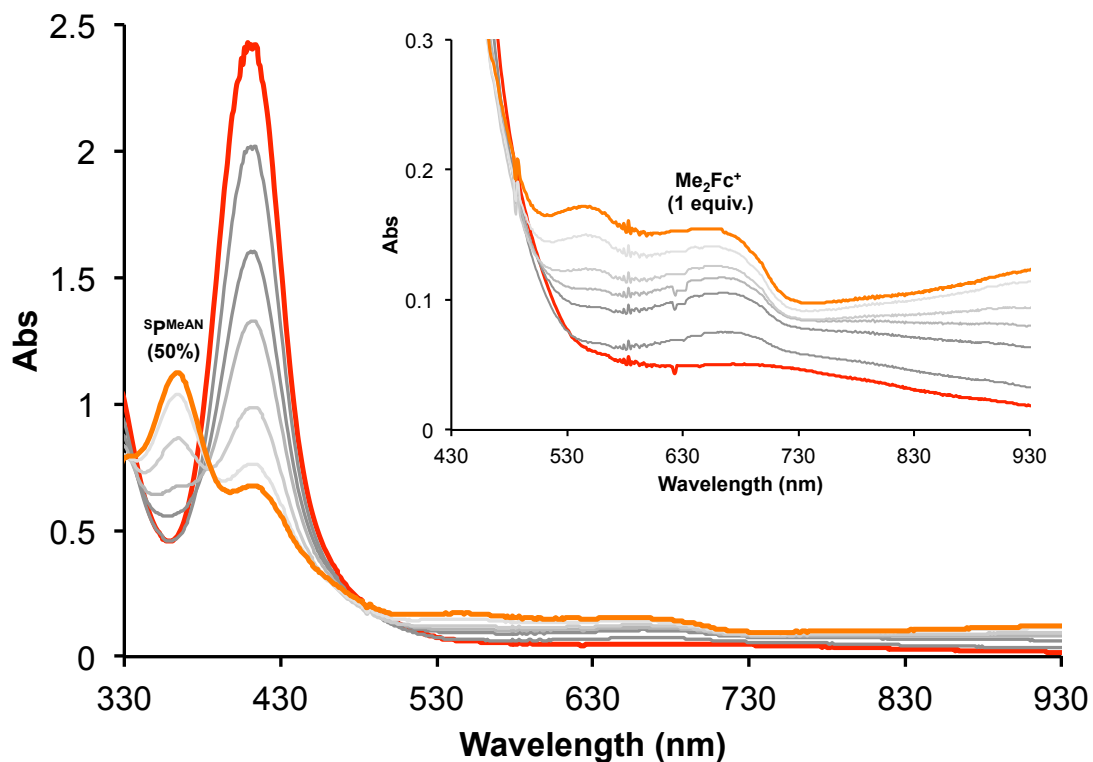

**Figure S12.** UV-vis for the  $1\text{e}^-$  reduction of  $O^{\text{MeAN}}\text{-2H}^+$  by  $\text{Me}_2\text{Fc}$  (10 equiv.). The decay of  $O^{\text{MeAN}}\text{-2H}^+$  features concluded 1 minute after the addition of the reductant with concomitant formation of 1 equiv. of  $\text{Me}_2\text{Fc}^+$  (orange spectrum) and 50% of  $\text{S}^{\text{P}^{\text{MeAN}}}$ . Note: similar results were obtained in the reduction of  $O^{\text{MeAN}}\text{-2BR}_3$  and  $O^{\text{MeAN}}\text{-Sc}^{3+}$  with  $\text{Me}_2\text{Fc}$ .

### 1.5.1 Reaction of $\text{O}^{\text{MeAN}}\text{-LA}$ towards C-H bonds (BNAH, BNAD and BzImH): Kinetic studies

After generation of the corresponding ( $\text{O}^{\text{MeAN}}\text{-LA}$ ) as described above (Section 1.3), 100  $\mu\text{L}$  of an acetone solution containing various amounts of the corresponding substrate (BNAH, BNAD or BzImH) were added, causing the decay of the  $\text{O}^{\text{MeAN}}\text{-LA}$  spectral features. The absorbance changes ( $\lambda = 400 \text{ nm}$ ) were fitted to single exponential decays. In all the cases (BNAH, BNAD and BzImH), a linear correlation between the reaction rate ( $k_{\text{obs}}$ ) and the substrate concentration was found, from which we obtained the second-order rate constant (slope). NOTE: regeneration of 0.2-0.3 equiv. of  $\text{S}^{\text{PMeAN}}$  suggests a secondary disproportionation reaction after hydride transfer.

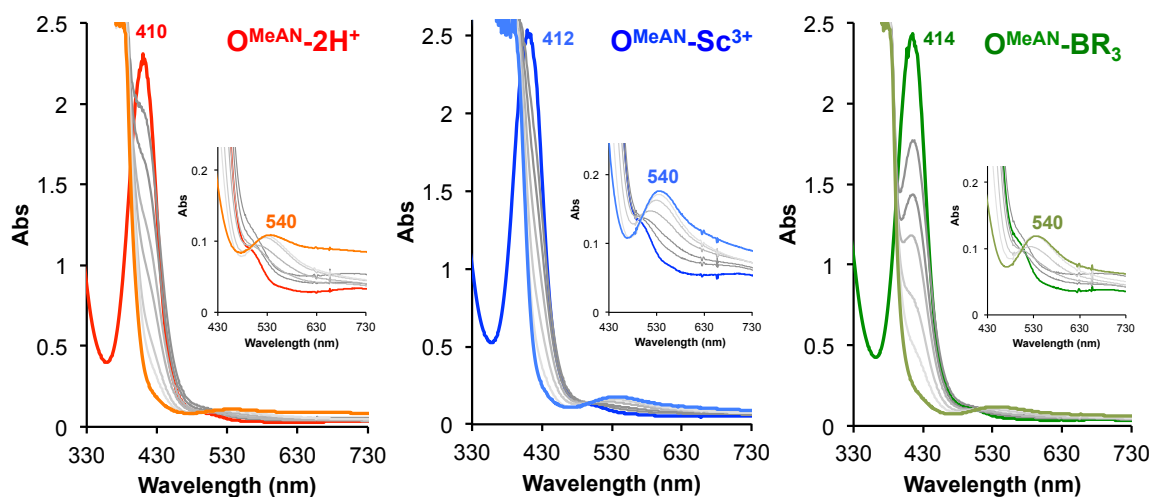

**Figure S13.** UV-vis spectral changes (decay) of the reaction between  $\text{O}^{\text{MeAN}}\text{-LA}$  and BNAH.

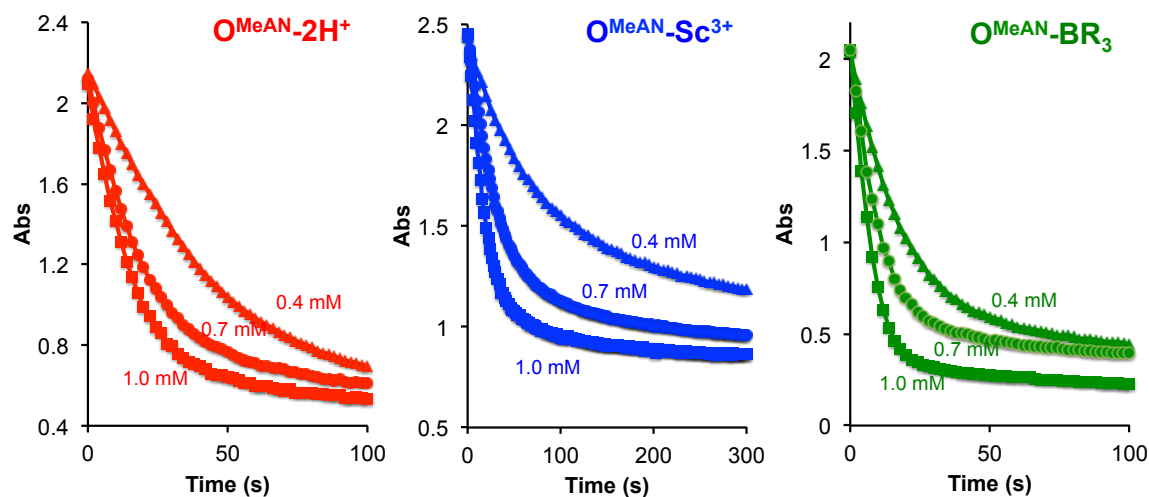

**Figure S14.** Decay (400 nm) of the UV-vis features of  $\text{O}^{\text{MeAN}}\text{-LA}$  upon addition of different amounts of BNAH (4, 7 and 10 equiv.)

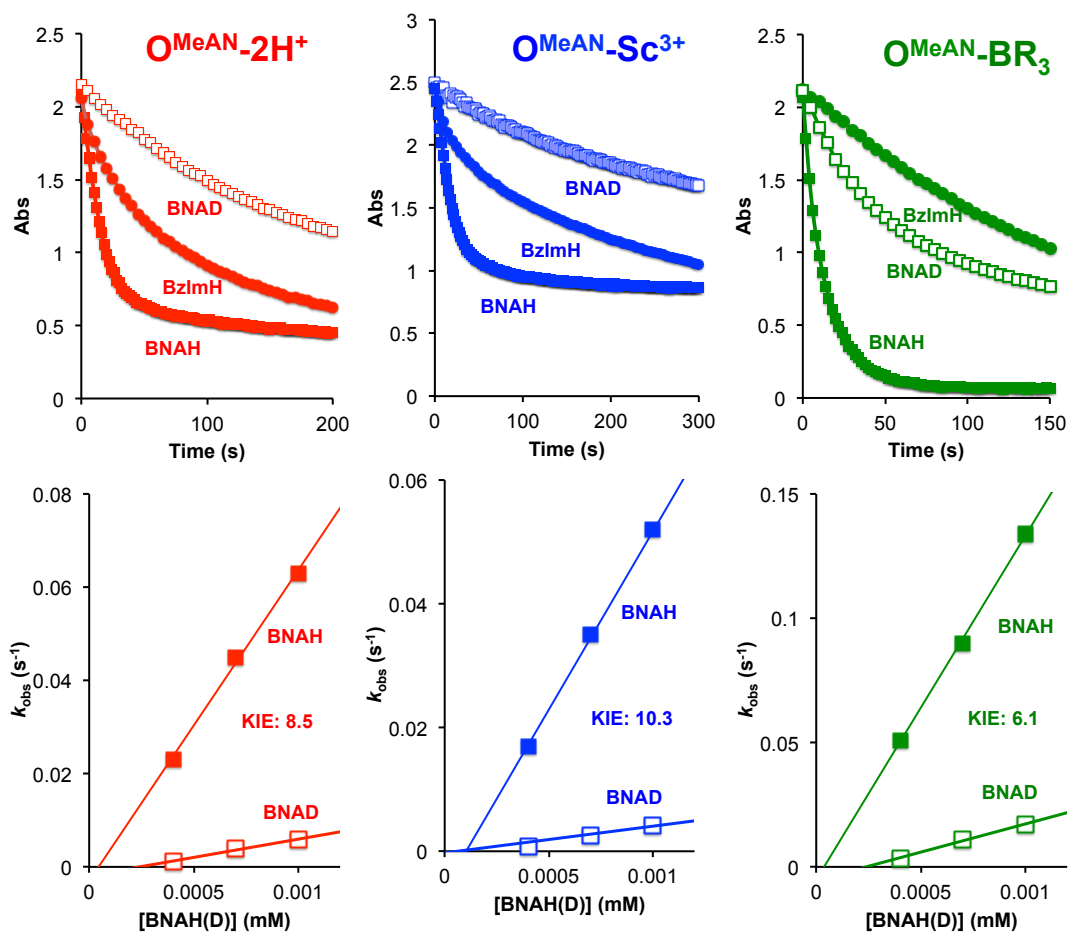

**Figure S15.** Top: decay (400 nm) of the UV-vis features of  $\text{O}^{\text{MeAN}}\text{-LA}$  upon addition of BNAH, BNAD or BzIMH (10 equiv.). Bottom: kinetic isotope effect (KIE) calculated from plotting the different reaction rates (pseudo-first-order fitting and linear correlation ( $k_{\text{obs}}$  vs.  $[\text{BNAH(D)}]$ ) obtained from the decay of the UV-vis features of  $\text{O}^{\text{MeAN}}\text{-LA}$  upon addition of different amounts of BNAH or BNAD (4, 7 and 10 equiv.).

### 1.5.2 Reaction of $\text{O}^{\text{MeAN}}\text{-LA}$ towards O-H bonds (substituted phenols): Kinetic studies

After generation of the corresponding ( $\text{O}^{\text{MeAN}}\text{-LA}$ ) as described above (Section 21.3), 100  $\mu\text{L}$  of an acetone solution containing various amounts of the corresponding substrate (substituted phenols) were added, causing the decay of the  $\text{O}^{\text{MeAN}}\text{-LA}$  spectral features. The absorbance changes ( $\lambda = 400 \text{ nm}$ ) were fitted to single exponential decays. In all the cases, a linear correlation between the reaction rate ( $k_{\text{obs}}$ ) and the substrate concentration was found, from which we obtained the second-order rate constant (slope).

The deuterated 4-MeO- $\text{C}_6\text{H}_4\text{OD}$  was prepared by the reaction of the 4-MeO-phenolate (110 mg, 0.75 mmols) with acetic acid- $d$  (1.5 mL, 25 mmols). The resulting product was dried under vacuum to eliminate the excess of acetic acid- $d$ , and the resulting white solid was dissolved in MeTHF. The resulting solution was filtered and the organic solvent was evaporated under vacuum, leading to the isolation of the 4-MeO- $\text{C}_6\text{H}_4\text{OD}$  as a white powder (44 mg, 47%). The purity of the product was confirmed by  $^1\text{H-NMR}$  (95% deuterated).

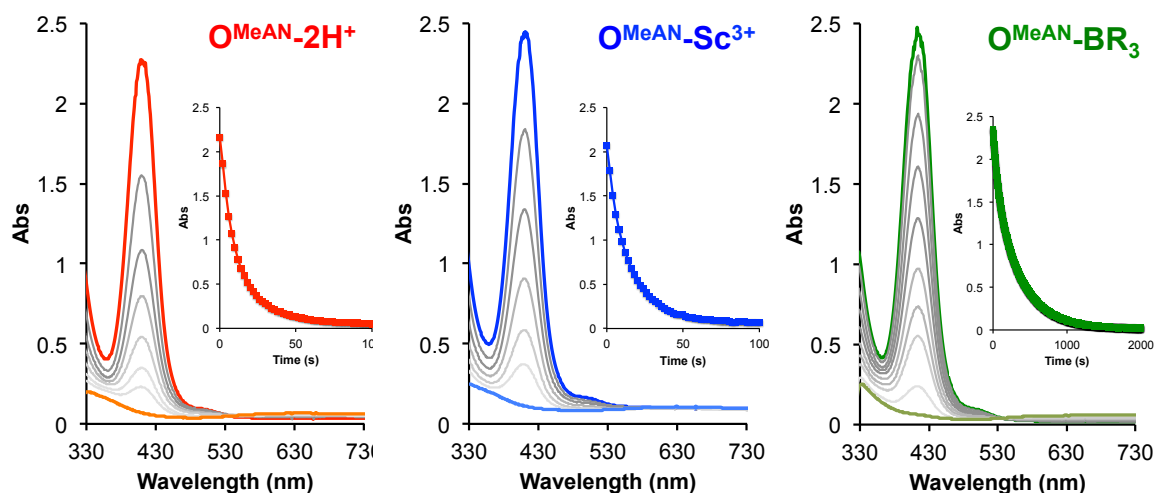

**Figure S16.** Decay (400 nm) of the UV-vis features of  $\text{O}^{\text{MeAN}}\text{-LA}$  upon addition of 4-MeO-Phenol (11 equiv.).

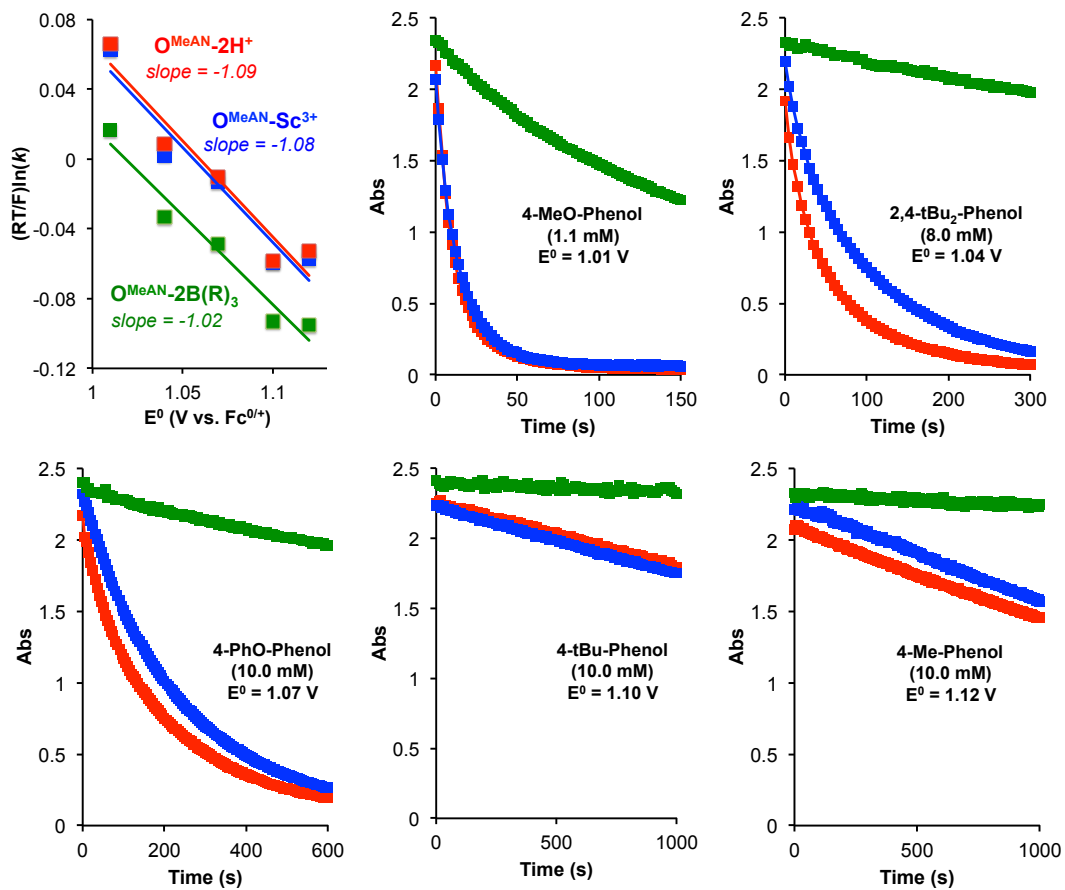

**Figure S17.** Decay (400 nm) of the UV-vis features of  $\text{O}^{\text{MeAN}}\text{-LA}$  upon addition of different substituted phenols. Top left: correlation of rate with phenol reduction potential.

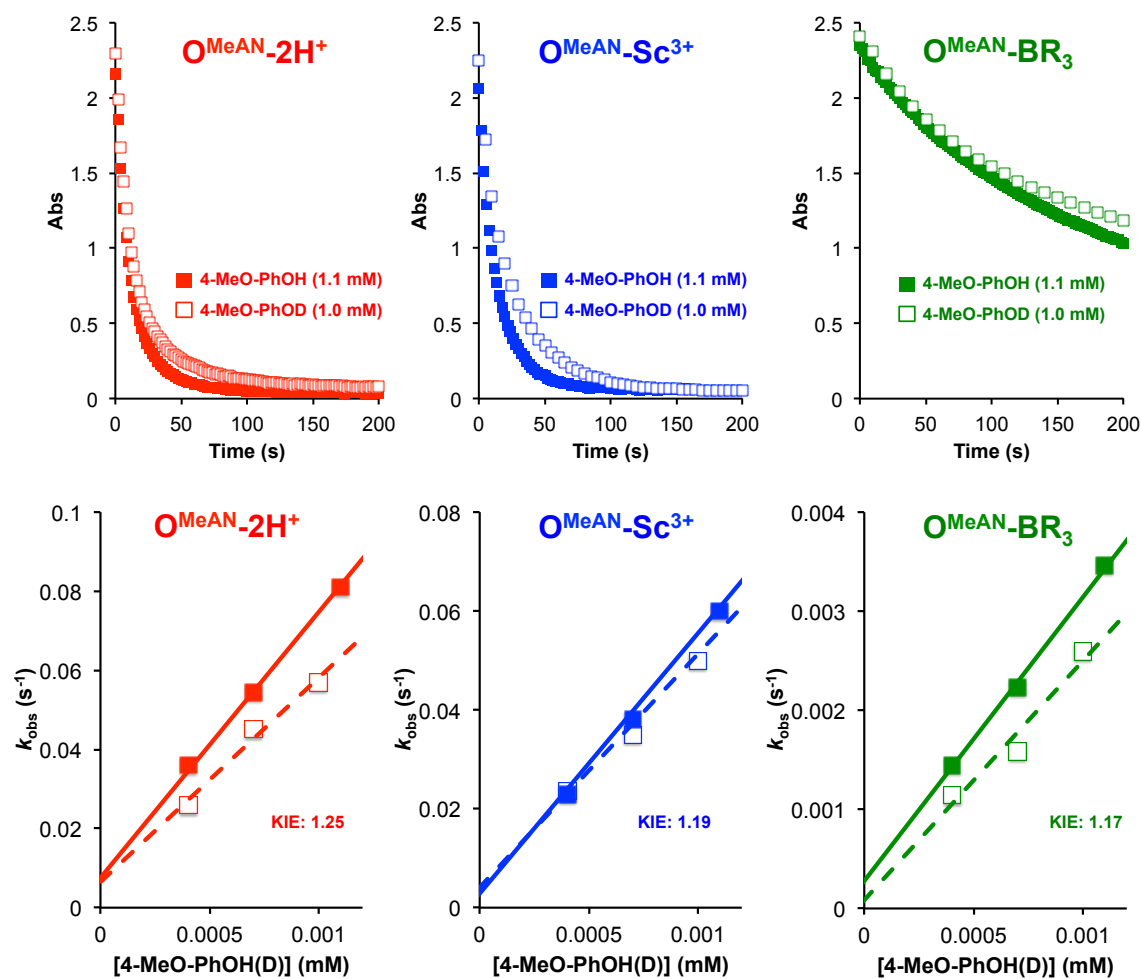

**Figure S18.** Kinetic isotope effect (KIE) calculated from plotting the different reaction rates (obtained by fitting the pseudo-first order exponential decays, see top) and linear correlation ( $k_{\text{obs}}$  vs. [4-MeO-PhOH(D)]) obtained from the reaction of  $\text{O}^{\text{MeAN}}\text{-LA}$  upon with different amounts of 4-MeO-PhOH or 4-MeO-PhOD.

## 2. Product analysis.

### 2.1 Reaction of $[(\text{MeAN})_2\text{Cu}_2(\text{O}_2^{2-})]^{2+}$ with substituted sodium phenolates: catechol quantification.

10 mL of a  $[(\text{MeAN})\text{Cu}^{\text{I}}](\text{BAR}^{\text{F}})$  solution (0.32 mM) in acetone prepared in the glovebox were placed in a 100 mL Schlenk flask equipped with a stir bar and capped with a rubber septum. After cooling the flask to  $-90\text{ }^\circ\text{C}$  (5 minutes at  $-90\text{ }^\circ\text{C}$ ), dioxygen was added to generate the corresponding  $[(\text{MeAN})_2\text{Cu}_2^{\text{II}}(\text{O}_2^{2-})]^{2+}$  (0.166 mM). After complete formation, 250  $\mu\text{L}$  of an acetone solution containing the corresponding 4-substituted sodium phenolate were added (1 mM) and the reaction mixture was stirred for 30 minutes at  $-90\text{ }^\circ\text{C}$ . After that, the reaction crude was quenched by addition of 3 mL of an aqueous HCl solution (0.5 M). After warming up, the reaction organic solvents (acetone) were evaporated under vacuum and the resulting aqueous solution was extracted with  $\text{CH}_2\text{Cl}_2$  (3 x 10 mL). The organic fractions were dried over  $\text{MgSO}_4$  and the solvents were removed under vacuum. The resulting solid product was dissolved in 0.7 mL of acetone- $d_6$  containing 10  $\mu\text{L}$  of an 0.32 mM acetophenone solution as internal standard. The catechol formation was quantified by  $^1\text{H-NMR}$  (Table S2).

**Table S2.** Catechol quantification from the reaction of  $[(\text{MeAN})_2\text{Cu}_2(\text{O}_2^{2-})]^{2+}$  with substituted sodium phenolates

| R-PhO $\text{Na}^+$ | $\sigma_p^+$ | [R-Catechol] (ppm) | Yield (%) |
|---------------------|--------------|--------------------|-----------|
| 4-Me                | -0.31        | 6.49 (2H)          | 29        |
| 4-Cl                | 0.114        | 6.72 (2H)          | 35        |
| 4-CN                | 0.659        | 7.15 (2H)          | 41        |
| 2,6-F $_2$          | -            | 6.65 (3H)          | 30        |



## 2.2 Reaction of $O^{\text{MeAN}}\text{-LA}$ with BNAH: quantification of oxidation products.

10 mL of a  $[(\text{MeAN})\text{Cu}^{\text{I}}](\text{BAR}^{\text{F}})$  solution (0.32 mM) in acetone prepared in the glovebox were placed in a 100 mL Schlenk flask equipped with a stir bar and capped with a rubber septum. After cooling the flask to  $-90\text{ }^{\circ}\text{C}$  (5 minutes at  $-90\text{ }^{\circ}\text{C}$ ), dioxygen was added to generate the corresponding  $[(\text{MeAN})_2\text{Cu}^{\text{II}}(\text{O}_2^{2-})]^{2+}$  (0.166 mM). After complete formation, 250  $\mu\text{L}$  of an acetone solution containing the corresponding equiv. of Lewis acid (0.32 mM  $\text{DMF}\cdot\text{TfOH}$ , 0.166 mM  $\text{Sc}(\text{CF}_3\text{SO}_3)$ , or 0.32 mM  $\text{B}(\text{C}_6\text{F}_5)_3$ ) were added. After 1 minute (to make sure the corresponding  $O^{\text{MeAN}}\text{-LA}$  complex is formed), 250  $\mu\text{L}$  of an acetone solution containing 10 equiv. of BNAH were added (1.66 mM). After 30 minutes, the reaction crude was quenched by addition of 3 mL of an aqueous HCl solution (0.1 M, 1.1 equiv). The solution was then allowed to warm up to room temp under vacuum and all solvent was removed, yielding a green solid. The  $^1\text{H-NMR}$  of the resulting green residue was taken in  $\text{DMSO-D}_6$  and  $\text{BNA}^+$  integration was compared to 1,2-dichloroethane as an internal standard.

**Table S3.**  $\text{BNA}^+$  quantification in the oxidation of BNAH by  $O^{\text{MeAN}}\text{-LA}$ . NOTE: Control experiments (without copper) showed that BNAH was oxidized to the corresponding  $\text{BNA}^+$  by the Lewis acids. The amount of product derived from that oxidation was subtracted from the values obtained from the quantity obtained in the  $O^{\text{MeAN}}\text{-LA}$  oxidations.

| $O^{\text{MeAN}}\text{-LA}$      | $\mu\text{mols BNA}^+$ (control <sup>a</sup> ) | Yield (%) |
|----------------------------------|------------------------------------------------|-----------|
| $O^{\text{MeAN}}\text{-2H}^+$    | 2.8 (1.2)                                      | 99        |
| $O^{\text{MeAN}}\text{-Sc}^{3+}$ | 2.4 (0.8)                                      | 99        |
| $O^{\text{MeAN}}\text{-2BR}_3$   | 1.9 (0.7)                                      | 75        |

<sup>a</sup>  $\mu\text{mols}$  of  $\text{BNA}^+$  obtained in the control reaction without Cu complex.

### 2.3 Reaction of $O^{\text{MeAN}}$ -LA with 2,4-tBu<sub>2</sub>-phenol: quantification of oxidation products.

10 mL of a [(MeAN)Cu<sup>I</sup>](BAR<sup>F</sup>) solution (0.32 mM) in acetone prepared in the glovebox were placed in a 100 mL Schlenk flask equipped with a stir bar and capped with a rubber septum. After cooling down the flask to -90 °C (5 minutes at -90 °C), dioxygen was added to generate the corresponding [(MeAN)<sub>2</sub>Cu<sup>II</sup>(O<sub>2</sub><sup>2-</sup>)<sup>2+</sup>] (0.166 mM). After complete formation, 250 μL of an acetone solution containing the corresponding equiv. of Lewis acid (0.32mM DMF·TfOH, 0.166 mM Sc(CF<sub>3</sub>SO<sub>3</sub>), or 0.32 mM B(C<sub>6</sub>F<sub>5</sub>)<sub>3</sub>) were added. After 1 minute (to make sure the corresponding  $O^{\text{MeAN}}$ -LA complex is formed), 250 μL of an acetone solution containing 50 equiv. of 2,4-tBu<sub>2</sub>-phenol were added (8.3 mM). After 2 hours, the reaction crude was quenched by addition of 3 mL of an aqueous HCl solution (0.5 M). After warming up, the reaction organic solvents (acetone) were evaporated under vacuum and the resulting aqueous solution was extracted with CH<sub>2</sub>Cl<sub>2</sub> (3 x 10 mL). The organic fractions were dried over MgSO<sub>4</sub> and the solvents were removed under vacuum. The resulting solid product was solved with 0.7 mL of acetone-d<sub>6</sub> and the C-C coupling product was quantified using 1,2-dichloroethane as an internal standard.

**Table S4.** C-C coupled product quantification in the oxidation of 2,4-tBu<sub>2</sub>-Phenol by  $O^{\text{MeAN}}$ -LA. Note: the final yield of C-C coupled product was calculated based on a stoichiometry where 1 equiv. of  $O^{\text{MeAN}}$ -LA leads to 0.5 equiv. of coupling product.<sup>5</sup>

| $O^{\text{MeAN}}$ -LA               | Yield (%) |
|-------------------------------------|-----------|
| $O^{\text{MeAN}}$ -2H <sup>+</sup>  | 67        |
| $O^{\text{MeAN}}$ -Sc <sup>3+</sup> | 57        |
| $O^{\text{MeAN}}$ -2BR <sub>3</sub> | 66        |

### 3. rRaman experiments.

Generation of  $[(\text{MeAN})_2\text{Cu}_2(\text{O}_2^{2-})]^{2+}$  ( $\text{SP}^{\text{MeAN}}$ ): 0.57  $\mu\text{L}$  of a  $[(\text{MeAN})\text{Cu}]^+$  (1.0 mM) solution in acetone were placed in a 5 mm rubber septum capped NMR tube. After cooling the NMR tube to  $-90\text{ }^\circ\text{C}$  (acetone/ $\text{N}_{2(\text{liq})}$  bath), dioxygen was bubbled through the solution mixture to generate the  $[(\text{MeAN})_2\text{Cu}_2(\text{O}_2^{2-})]^{2+}$  complex (1 mM).

$[(\text{MeAN})_2\text{Cu}^{\text{III}}_2(\text{O}_2^{2-})_2(2,6\text{-F}_2\text{-PhO}^-)]^+(\text{O}^{\text{MeAN}}\text{-F}_2\text{PhO}^-)$ : 0.57  $\mu\text{L}$  of a  $[(\text{MeAN})\text{Cu}]^+$  (1.0 mM) solution in acetone were placed in a 5 mm rubber septum capped NMR tube. After cooling the NMR tube to  $-90\text{ }^\circ\text{C}$  (acetone/ $\text{N}_{2(\text{liq})}$  bath), dioxygen was bubbled through the solution mixture to generate the form the  $[(\text{MeAN})_2\text{Cu}_2(\text{O}_2^{2-})]^{2+}$  complex (0.5 mM). To generate the  $[(\text{MeAN})_2\text{Cu}^{\text{III}}_2(\text{O}_2^{2-})_2(2,6\text{-F}_2\text{-PhO}^-)]^+$ , 50  $\mu\text{L}$  of an acetone solution containing sodium 2,6- $\text{F}_2$ -phenolate (3 mM) was added. Two samples were generated, depending on the time they were frozen (10/300 seconds after addition of phenolate).

$[(\text{MeAN})_2\text{Cu}^{\text{III}}_2(\text{O}_2^{2-})_2(\text{DMF}\cdot\text{CF}_3\text{SO}_3\text{H})_2]^{2+}$  ( $\text{O}^{\text{MeAN}}\text{-2H}^+$ ): 0.57  $\mu\text{L}$  of a  $[(\text{MeAN})\text{Cu}]^+$  (1.0 mM) solution in acetone were placed in a 5 mm rubber septum capped NMR tube. After cooling the NMR tube to  $-90\text{ }^\circ\text{C}$  (acetone/ $\text{N}_{2(\text{liq})}$  bath), dioxygen was bubbled through the solution mixture to generate the form the  $[(\text{MeAN})_2\text{Cu}_2(\text{O}_2^{2-})]^{2+}$  complex (0.5 mM). To generate the  $\text{O}^{\text{MeAN}}\text{-2H}^+$ , 50  $\mu\text{L}$  of an acetone solution containing 2 equiv. of  $\text{DMF}\cdot\text{CF}_3\text{SO}_3\text{H}$  (1 mM) were added.

$[(\text{MeAN})_2\text{Cu}^{\text{III}}_2(\text{O}_2^{2-})_2(\text{Sc}(\text{CF}_3\text{SO}_3)_3)]^{2+}$  ( $\text{O}^{\text{MeAN}}\text{-Sc}^{3+}$ ): 0.57  $\mu\text{L}$  of a  $[(\text{MeAN})\text{Cu}]^+$  (1.0 mM) solution in acetone were placed in a 5 mm rubber septum capped NMR tube. After cooling the NMR tube to  $-90\text{ }^\circ\text{C}$  (acetone/ $\text{N}_{2(\text{liq})}$  bath), dioxygen was bubbled through the solution mixture to generate the form the  $[(\text{MeAN})_2\text{Cu}_2(\text{O}_2^{2-})]^{2+}$  complex (0.5 mM). To generate the  $\text{O}^{\text{MeAN}}\text{-Sc}^{3+}$ , 50  $\mu\text{L}$  of an acetone solution containing 1 equiv. of  $\text{Sc}(\text{CF}_3\text{SO}_3)_3$  (0.5 mM) were added.

$[(\text{MeAN})_2\text{Cu}^{\text{III}}_2(\text{O}_2^{2-})_2(\text{B}(\text{C}_6\text{F}_5)_3)_2]^{2+}$  ( $\text{O}^{\text{MeAN}}\text{-2BR}_3$ ): 0.57  $\mu\text{L}$  of a  $[(\text{MeAN})\text{Cu}]^+$  (1.0 mM) solution in acetone were placed in a 5 mm rubber septum capped NMR tube. After cooling the NMR tube to  $-90\text{ }^\circ\text{C}$  (acetone/ $\text{N}_{2(\text{liq})}$  bath), dioxygen was bubbled through the solution mixture to generate the form the  $[(\text{MeAN})_2\text{Cu}_2(\text{O}_2^{2-})]^{2+}$  complex (0.5 mM). To generate the  $\text{O}^{\text{MeAN}}\text{-2BR}_3$ , 50  $\mu\text{L}$  of an acetone solution containing 2 equiv. of  $\text{B}(\text{C}_6\text{F}_5)_3$  (0.5 mM) were added.

#### 4. DFT calculations.

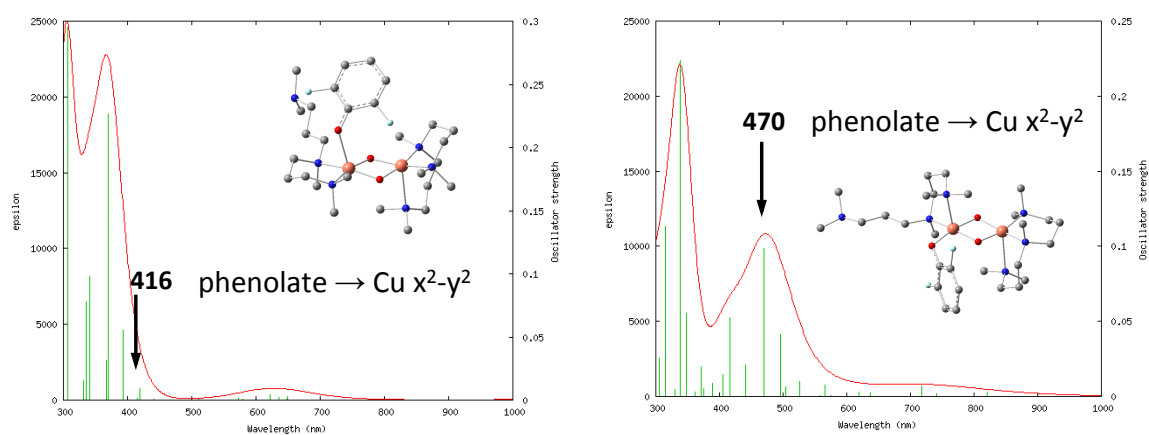

**Figure S19.** TD-DFT calculated absorption spectra of  $[(\text{MeAN})_2\text{Cu}^{\text{III}}(\text{O}^{2-})_2(2,6\text{-F}_2\text{-PhO})]^+$  with phenolate occupying an axial (left) or equatorial (right) position. The phenolate  $\rightarrow$  Cu LMCT is indicated (416 nm and weak for axial phenolate, 470 nm and intense for equatorial phenolate).

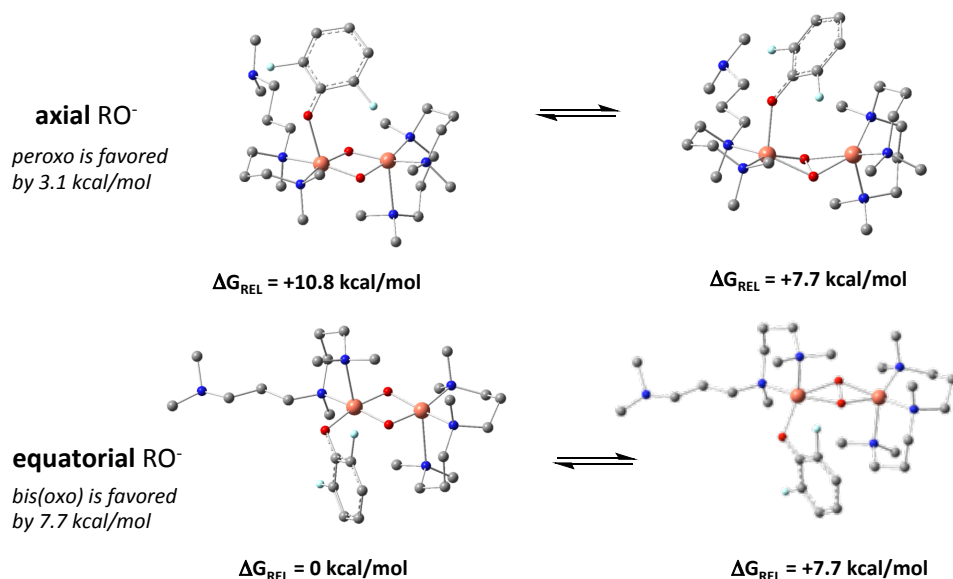

**Figure S20.** Relative energies ( $\Delta G$ , 298 K) of  $\text{S}^{\text{PMeAN}}$  and  $\text{O}^{\text{MeAN}}$  isomers with axial (top) or equatorial (bottom) phenolate coordination. The relative energies include a correction of -12 kcal/mol as determined by previous calibration of the B3LYP functional to bis( $\mu$ -oxo)/peroxo equilibria.<sup>2</sup>

Key to oxo  
normal modes:

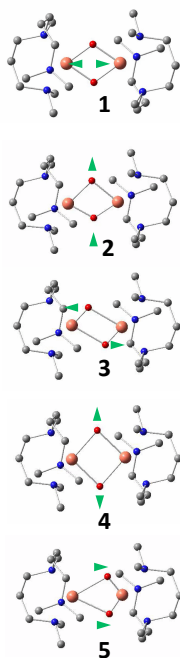

Axial, bis(oxo)

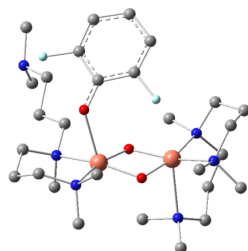

1: 303[300] cm<sup>-1</sup>  
2: 660[630]  
3: 632[600]  
4: 597[571]  
5: 577[559]

Equatorial, bis(oxo)

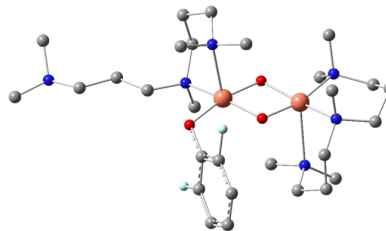

1: 307[305] cm<sup>-1</sup>  
2: 582[562]  
3: 605[574]  
4: 619[593]  
5: 656[630]

**Figure S21.** Calculated normal modes and <sup>16</sup>O<sub>2</sub>/<sup>18</sup>O<sub>2</sub> isotope effects for 2,6-F<sub>2</sub>-PhO<sup>-</sup>-coordinated <sup>MeAN</sup>O.

Axial 2,6-F<sub>2</sub>PhO; bis(oxo)

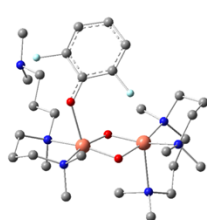

Cu-O<sub>Ar</sub> 2.314  
Cu-N 1.986, 2.050; 2.023, 2.060, 2.543  
Cu-O 1.801, 1.823; 1.805, 1.816  
Cu-O-R 124.2; Cu...F 3.020

Axial 2,6-F<sub>2</sub>PhO; peroxo

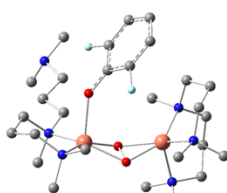

Cu-O<sub>Ar</sub> 2.216; O-O 1.479  
Cu-N 1.981, 2.031; 2.021, 2.035, 2.294  
Cu-O 1.904, 2.003; 1.958, 1.981  
Cu-OR 143.9; Cu-O-O-Cu 144.6

Axial 2,4-F<sub>2</sub>PhO; bis(oxo)

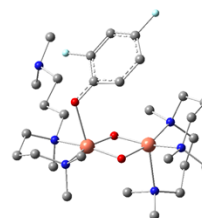

Cu-O<sub>Ar</sub> 2.309  
Cu-N 1.987, 2.043; 2.027, 2.065, 2.451  
Cu-O 1.800, 1.823; 1.808, 1.810  
Cu-O-R 119.2

Equat. 2,6-F<sub>2</sub>PhO; bis(oxo)

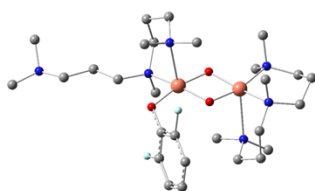

Cu-O<sub>Ar</sub> 1.873  
Cu-N<sub>eq</sub> 2.012; 2.006, 2.026  
Cu-N<sub>ax</sub> 2.404; 2.564  
Cu-O 1.804, 1.814; 1.817, 1.819  
Cu-O-R 115.1

Equat. 2,6-F<sub>2</sub>PhO; peroxo

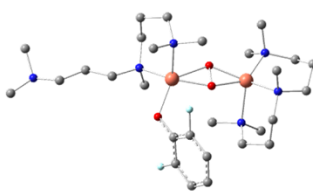

Cu-O<sub>Ar</sub> 1.945; O-O 1.489  
Cu-N<sub>eq</sub> 2.024; 2.019, 2.024  
Cu-N<sub>ax</sub> 2.103; 2.289  
Cu-O 1.909, 1.976; 1.922, 2.234  
Cu-OR 121.2; Cu-O-O-Cu 173.7

Equat. 2,4-F<sub>2</sub>PhO; bis(oxo)

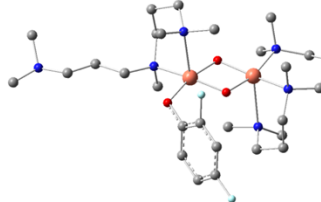

Cu-O<sub>Ar</sub> 1.874  
Cu-N<sub>eq</sub> 2.014; 2.007, 2.024  
Cu-N<sub>ax</sub> 2.442; 2.572  
Cu-O 1.804, 1.816; 1.813, 1.825  
Cu-O-R 115.6

**Figure S22.** DFT-calculated structures and relevant bond metrics (Å; °) for 2,6-F<sub>2</sub>-PhO<sup>-</sup>- and 2,4-F<sub>2</sub>-PhO<sup>-</sup>-coordinated <sup>sp</sup>MeAN and <sup>MeAN</sup>O.

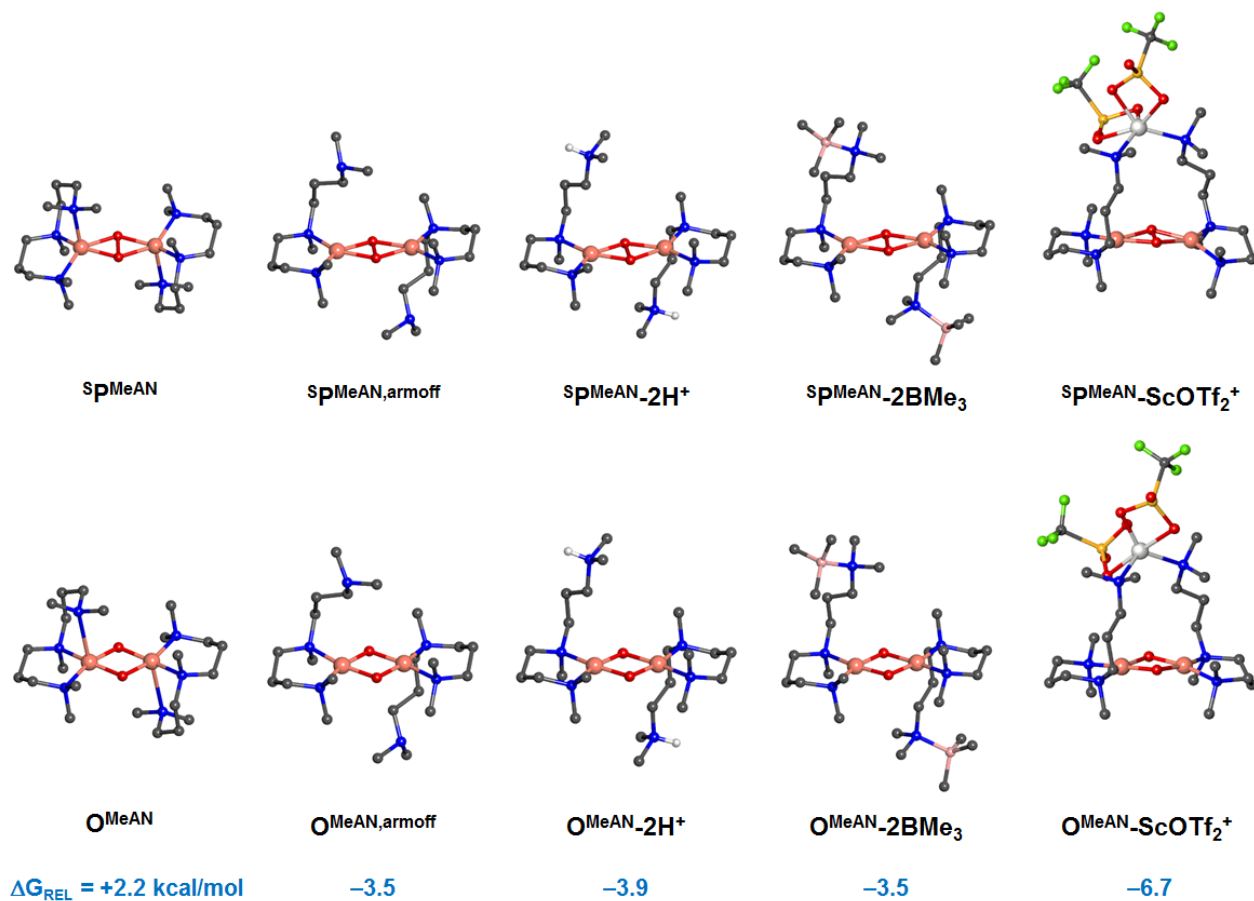

**Figure S23.** DFT-optimized structures and relative energies of  $\text{S}^{\text{PMeAN}}$  and  $\text{O}^{\text{MeAN}}$  and their Lewis acid adducts  $\text{O}^{\text{MeAN}}\text{-LA}$  and  $\text{S}^{\text{PMeAN}}\text{-LA}$ . The relative energy of the bis( $\mu$ -oxo) isomer relative to peroxy is given for each complex, which includes an energy correction of -12 kcal/mol as determined by previous calibration of the B3LYP functional to bis( $\mu$ -oxo)/peroxy equilibria.<sup>6</sup>

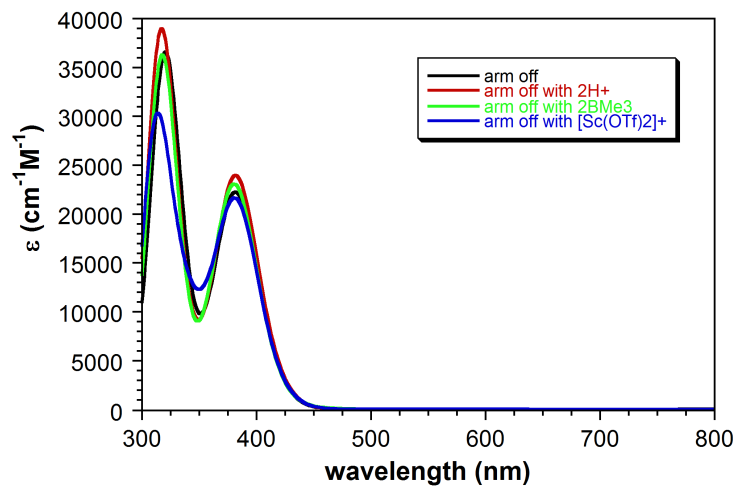

**Figure S24.** Time-dependent DFT-calculated absorption spectra of  $\text{O}^{\text{MeAN}}$  with the axial N uncoordinated (black),  $\text{O}^{\text{MeAN}}\text{-}2\text{H}^+$  (red),  $\text{O}^{\text{MeAN}}\text{-}2\text{BMe}_3$  (green), and  $\text{O}^{\text{MeAN}}\text{-ScOTf}_2^+$  (blue). Calculated  $\pi^*_\sigma \rightarrow d_{xy}$  and  $\sigma^* \rightarrow d_{xy}$  LMCTs are at 321/382, 317/382, 318/381, and 312/382 nm, respectively.

**Table S5.** DFT-calculated normal modes in  $\text{Cu}^{\text{III}}_2(\mu\text{-O})_2$  models. Calculated frequencies ( $\text{cm}^{-1}$ , scaled by 0.966 according to reference 7) are given for  $^{16}\text{O}_2$  and ( $^{18}\text{O}_2$ ) isotopologues.

|                                                                                     | 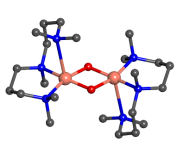 |  |  |  |  |
|-------------------------------------------------------------------------------------|-----------------------------------------------------------------------------------|-----------------------------------------------------------------------------------|-----------------------------------------------------------------------------------|------------------------------------------------------------------------------------|-------------------------------------------------------------------------------------|
| Normal Mode:                                                                        | $\text{O}^{\text{MeAN}}$                                                          | $\text{O}^{\text{MeAN}}_{\text{arnoff}}$                                          | $\text{O}^{\text{MeAN}}\text{-}2\text{H}^+$                                       | $\text{O}^{\text{MeAN}}\text{-}2\text{BMe}_3$                                      | $\text{O}^{\text{MeAN}}\text{-ScOTf}_2^+$                                           |
|    | 645 (616)                                                                         | 659 (630)                                                                         | 665 (636)                                                                         | 664 (635)                                                                          | 659 (629)                                                                           |
|    | 611 (581)                                                                         | 623 (593)                                                                         | 625 (596)                                                                         | 625 (596)                                                                          | 627 (597)                                                                           |
|   | 604 (579)                                                                         | 618 (593)                                                                         | 618 (592)                                                                         | 620 (594)                                                                          | 618 (592)                                                                           |
|  | 577 (557)                                                                         | 593 (574)                                                                         | 592 (573)                                                                         | 592 (572)                                                                          | 593 (572)                                                                           |



|                                                                                   | $\text{O}^{\text{MeAN}}\text{-2H}^+$<br>N-bound | $\text{O}^{\text{MeAN}}\text{-2H}^+$<br>O-bound |
|-----------------------------------------------------------------------------------|-------------------------------------------------|-------------------------------------------------|
| 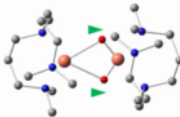 | 659(630)                                        | 491(472)                                        |
|  | 623(593)                                        | 554(531)                                        |
|  | 618(593)                                        | 430(423)                                        |
|  | 593(574)                                        | 426(410)                                        |
|  | 256(256)                                        | 246(246)                                        |

**Figure S25.** Comparison of DFT-calculated normal mode frequencies for N-bound vs. O-bound  $\text{O}^{\text{MeAN}}\text{-2H}^+$ . The significantly weaker Cu-O bonding in the O-bound isomer results in very low frequency modes inconsistent with the observed resonance Raman data for  $\text{O}^{\text{MeAN}}$ .

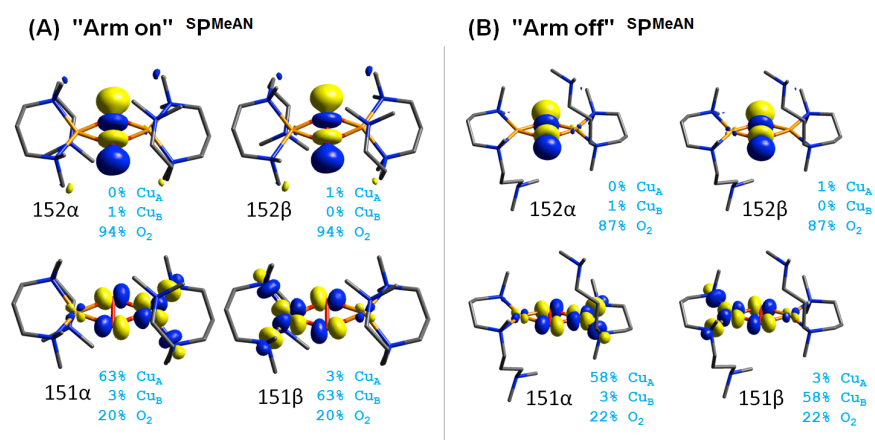

**Figure S26.** Comparison of LUMO ( $\text{Cu } dx^2-y^2 + \text{O}_2 \pi^*_{\sigma}$ ) and LUMO+1 ( $\text{O}_2 \sigma^*$ ) in the "arm on" and "arm off" isomers of  $\text{sp}^{\text{MeAN}}$ . Note the "arm off" isomer shows more unoccupied  $\text{O}_2 \pi^*_{\sigma}$  character (MO 151), which implies slightly higher Cu-O covalency, and less unoccupied  $\text{O}_2 \sigma^*$  character (MO 152), which implies stronger  $\text{Cu} \rightarrow \text{O}_2 \sigma^*$  backbonding and thus a weaker O-O bond.

xyz coordinates for DFT structures:

SPMeAN

|    |         |         |         |   |         |         |         |
|----|---------|---------|---------|---|---------|---------|---------|
| Cu | -1.8267 | -0.0161 | 0.8021  | H | -1.3341 | -1.9694 | 2.9788  |
| Cu | 1.8268  | 0.0164  | 0.6845  | C | -2.5420 | 0.2902  | 3.5720  |
| O  | -0.0100 | 0.0041  | -0.0007 | H | -3.0417 | -0.0447 | 4.4894  |
| O  | 0.0101  | -0.0026 | 1.4873  | H | -1.4623 | 0.2896  | 3.7302  |
| N  | 2.2486  | -2.2900 | 0.9876  | H | -2.8711 | 1.3035  | 3.3419  |
| N  | 3.0171  | 0.6624  | 2.2000  | C | 3.5361  | -2.8907 | 0.5486  |
| N  | 2.8757  | 0.6246  | -0.9481 | H | 4.3852  | -2.3685 | 0.9910  |
| N  | -2.2489 | 2.2904  | 0.4978  | H | 3.6215  | -2.8282 | -0.5387 |
| N  | -3.0171 | -0.6628 | -0.7129 | H | 3.5948  | -3.9525 | 0.8353  |
| N  | -2.8752 | -0.6234 | 2.4352  | C | 1.1488  | -3.0188 | 0.3004  |
| C  | -3.5363 | 2.8912  | 0.9366  | H | 0.1904  | -2.6020 | 0.6075  |
| H  | -3.6215 | 2.8294  | 2.0240  | H | 1.2503  | -2.9044 | -0.7816 |
| H  | -4.3855 | 2.3687  | 0.4947  | H | 1.1702  | -4.0926 | 0.5432  |
| H  | -3.5952 | 3.9528  | 0.6492  | C | 2.0787  | -2.4767 | 2.4614  |
| C  | -1.1490 | 3.0196  | 1.1844  | H | 2.1793  | -3.5486 | 2.7011  |
| H  | -1.1706 | 4.0933  | 0.9411  | H | 1.0526  | -2.1820 | 2.7030  |
| H  | -0.1906 | 2.6028  | 0.8772  | C | 3.0490  | -1.6751 | 3.3395  |
| H  | -1.2503 | 2.9057  | 2.2664  | H | 2.9397  | -2.0608 | 4.3614  |
| C  | -2.0792 | 2.4762  | -0.9762 | H | 4.0902  | -1.8804 | 3.0702  |
| H  | -2.1799 | 3.5479  | -1.2166 | C | 2.7799  | -0.1679 | 3.4404  |
| H  | -1.0532 | 2.1812  | -1.2178 | H | 3.4027  | 0.2558  | 4.2417  |
| C  | -3.0498 | 1.6740  | -1.8535 | H | 1.7334  | -0.0086 | 3.7199  |
| H  | -4.0909 | 1.8792  | -1.5840 | C | 2.5583  | 2.0521  | 2.5265  |
| H  | -2.9410 | 2.0592  | -2.8757 | H | 3.1081  | 2.4404  | 3.3930  |
| C  | -2.7804 | 0.1669  | -1.9538 | H | 1.4921  | 2.0305  | 2.7567  |
| H  | -3.4032 | -0.2575 | -2.7547 | H | 2.7223  | 2.7212  | 1.6825  |
| H  | -1.7339 | 0.0076  | -2.2335 | C | 4.4816  | 0.6813  | 1.8632  |
| C  | -2.5584 | -2.0527 | -1.0386 | H | 5.0120  | 1.1883  | 2.6821  |
| H  | -2.7219 | -2.7213 | -0.1941 | H | 4.8317  | -0.3526 | 1.8425  |
| H  | -3.1086 | -2.4416 | -1.9046 | C | 4.8382  | 1.3520  | 0.5289  |
| H  | -1.4924 | -2.0311 | -1.2694 | H | 4.5250  | 2.4008  | 0.5128  |
| C  | -4.4816 | -0.6816 | -0.3757 | H | 5.9337  | 1.3792  | 0.4797  |
| H  | -4.8316 | 0.3524  | -0.3553 | C | 4.3627  | 0.6118  | -0.7282 |
| H  | -5.0121 | -1.1889 | -1.1942 | H | 4.8425  | 1.0485  | -1.6155 |
| C  | -4.8379 | -1.3517 | 0.9590  | H | 4.6705  | -0.4369 | -0.6742 |
| H  | -4.5246 | -2.4005 | 0.9755  | C | 2.4109  | 1.9979  | -1.3179 |
| H  | -5.9335 | -1.3790 | 1.0083  | H | 2.9165  | 2.3359  | -2.2309 |
| C  | -4.3623 | -0.6109 | 2.2156  | H | 2.6194  | 2.7077  | -0.5179 |
| H  | -4.8419 | -1.0472 | 3.1032  | H | 1.3347  | 1.9710  | -1.4915 |
| H  | -4.6703 | 0.4378  | 2.1612  | C | 2.5426  | -0.2884 | -2.0854 |
| C  | -2.4103 | -1.9965 | 2.8056  | H | 2.8720  | -1.3018 | -1.8559 |
| H  | -2.6191 | -2.7068 | 2.0061  | H | 3.0423  | 0.0471  | -3.0027 |
| H  | -2.9157 | -2.3340 | 3.7189  | H | 1.4629  | -0.2879 | -2.2436 |

O<sub>MeAN</sub>

|    |         |         |         |   |         |         |         |
|----|---------|---------|---------|---|---------|---------|---------|
| Cu | -1.4349 | -0.1291 | 0.8006  | H | -1.1177 | -1.8897 | 3.0743  |
| Cu | 1.4350  | 0.1295  | 0.6859  | C | -2.2550 | 0.4360  | 3.4916  |
| O  | -0.0429 | -0.0054 | -0.3630 | H | -2.7653 | 0.1395  | 4.4149  |
| O  | 0.0430  | 0.0054  | 1.8495  | H | -1.1768 | 0.4373  | 3.6446  |
| N  | 2.2943  | -2.5061 | 0.9598  | H | -2.5824 | 1.4333  | 3.2023  |
| N  | 2.7220  | 0.5823  | 2.1708  | C | 3.6131  | -3.0924 | 0.6215  |
| N  | 2.5949  | 0.5346  | -0.9128 | H | 4.4175  | -2.5876 | 1.1603  |
| N  | -2.2942 | 2.5061  | 0.5261  | H | 3.8015  | -2.9855 | -0.4505 |
| N  | -2.7222 | -0.5827 | -0.6838 | H | 3.6564  | -4.1662 | 0.8720  |
| N  | -2.5947 | -0.5333 | 2.3996  | C | 1.2522  | -3.2445 | 0.2077  |
| C  | -3.6132 | 3.0922  | 0.8641  | H | 0.2797  | -2.7866 | 0.3910  |
| H  | -3.8017 | 2.9854  | 1.9361  | H | 1.4603  | -3.1958 | -0.8642 |
| H  | -4.4174 | 2.5872  | 0.3252  | H | 1.2080  | -4.3068 | 0.5019  |
| H  | -3.6566 | 4.1660  | 0.6134  | C | 2.0184  | -2.6626 | 2.4143  |
| C  | -1.2524 | 3.2452  | 1.2780  | H | 2.1735  | -3.7165 | 2.7084  |
| H  | -1.2084 | 4.3073  | 0.9832  | H | 0.9593  | -2.4373 | 2.5672  |
| H  | -0.2797 | 2.7875  | 1.0953  | C | 2.8493  | -1.7624 | 3.3381  |
| H  | -1.4608 | 3.1971  | 2.3499  | H | 2.6915  | -2.1299 | 4.3611  |
| C  | -2.0183 | 2.6621  | -0.9285 | H | 3.9216  | -1.8914 | 3.1580  |
| H  | -2.1734 | 3.7158  | -1.2231 | C | 2.4551  | -0.2801 | 3.3920  |
| H  | -0.9592 | 2.4366  | -1.0813 | H | 2.9915  | 0.1965  | 4.2239  |
| C  | -2.8492 | 1.7616  | -1.8521 | H | 1.3835  | -0.1948 | 3.5871  |
| H  | -3.9215 | 1.8908  | -1.6723 | C | 2.3258  | 1.9842  | 2.5477  |
| H  | -2.6910 | 2.1287  | -2.8752 | H | 2.9287  | 2.3241  | 3.3969  |
| C  | -2.4553 | 0.2791  | -1.9055 | H | 1.2719  | 1.9898  | 2.8239  |
| H  | -2.9919 | -0.1977 | -2.7371 | H | 2.4863  | 2.6656  | 1.7121  |
| H  | -1.3837 | 0.1935  | -2.1006 | C | 4.1889  | 0.5530  | 1.8458  |
| C  | -2.3264 | -1.9849 | -1.0600 | H | 4.7194  | 1.0153  | 2.6886  |
| H  | -2.4868 | -2.6658 | -0.2240 | H | 4.4972  | -0.4906 | 1.7958  |
| H  | -2.9296 | -2.3251 | -1.9089 | C | 4.5778  | 1.2379  | 0.5366  |
| H  | -1.2725 | -1.9907 | -1.3366 | H | 4.2823  | 2.2917  | 0.5164  |
| C  | -4.1891 | -0.5529 | -0.3586 | H | 5.6733  | 1.2418  | 0.4925  |
| H  | -4.4971 | 0.4908  | -0.3091 | C | 4.0821  | 0.4836  | -0.6947 |
| H  | -4.7198 | -1.0156 | -1.2011 | H | 4.5585  | 0.8806  | -1.6003 |
| C  | -4.5779 | -1.2370 | 0.9510  | H | 4.3575  | -0.5707 | -0.6121 |
| H  | -4.2827 | -2.2909 | 0.9717  | C | 2.1835  | 1.9048  | -1.3654 |
| H  | -5.6734 | -1.2407 | 0.9952  | H | 2.7426  | 2.1792  | -2.2667 |
| C  | -4.0818 | -0.4821 | 2.1818  | H | 2.3790  | 2.6450  | -0.5895 |
| H  | -4.5582 | -0.8786 | 3.0877  | H | 1.1179  | 1.8909  | -1.5875 |
| H  | -4.3571 | 0.5722  | 2.0986  | C | 2.2556  | -0.4344 | -2.0052 |
| C  | -2.1834 | -1.9035 | 2.8526  | H | 2.5833  | -1.4317 | -1.7163 |
| H  | -2.3793 | -2.6439 | 2.0769  | H | 2.7659  | -0.1374 | -2.9283 |
| H  | -2.7422 | -2.1775 | 3.7541  | H | 1.1774  | -0.4359 | -2.1583 |

**S<sup>P</sup>MeAN with axial N uncoordinated**

|    |         |         |         |   |         |         |         |
|----|---------|---------|---------|---|---------|---------|---------|
| Cu | -1.7382 | -0.4633 | 0.5213  | H | -3.1761 | 0.1555  | 4.0307  |
| Cu | 1.7673  | 0.1749  | 0.4815  | H | -1.5479 | 0.3944  | 3.3417  |
| O  | 0.0157  | -0.2012 | -0.2647 | H | -2.9387 | 1.2730  | 2.6605  |
| O  | 0.0280  | -0.1728 | 1.2390  | H | 5.6400  | 1.8759  | 0.4467  |
| N  | -2.2881 | 3.8269  | -0.1556 | C | 4.5901  | 1.5603  | 0.4446  |
| N  | -2.9364 | -0.6832 | -1.0532 | C | 4.3871  | 0.6860  | -0.7993 |
| N  | -2.8430 | -0.7897 | 2.1402  | H | 4.0061  | 2.4863  | 0.3845  |
| C  | -2.6659 | 4.8719  | -1.1240 | C | 4.3304  | 0.8240  | 1.7647  |
| H  | -2.9324 | 5.7840  | -0.5813 | N | 2.9454  | 0.3671  | -1.1128 |
| H  | -3.5383 | 4.5610  | -1.7045 | H | 4.9176  | -0.2575 | -0.6556 |
| H  | -1.8466 | 5.1142  | -1.8271 | H | 4.8198  | 1.1732  | -1.6823 |
| C  | -1.1939 | 4.3069  | 0.7059  | N | 2.8703  | 0.6221  | 2.0736  |
| H  | -0.2734 | 4.5440  | 0.1389  | H | 4.7819  | 1.3674  | 2.6045  |
| H  | -0.9520 | 3.5441  | 1.4536  | H | 4.7954  | -0.1657 | 1.7257  |
| H  | -1.5131 | 5.2134  | 1.2296  | C | 2.8728  | -0.8528 | -2.0149 |
| C  | -1.9059 | 2.5661  | -0.8171 | C | 2.3468  | 1.5244  | -1.8654 |
| H  | -1.0926 | 2.7226  | -1.5551 | C | 2.2839  | 1.8806  | 2.6432  |
| H  | -1.4902 | 1.9174  | -0.0385 | C | 2.7186  | -0.4829 | 3.0761  |
| C  | -3.0944 | 1.8714  | -1.5060 | C | 3.2498  | -2.1970 | -1.3638 |
| H  | -3.9438 | 1.8627  | -0.8135 | H | 3.5339  | -0.6495 | -2.8674 |
| H  | -3.4142 | 2.4673  | -2.3679 | H | 1.8490  | -0.8970 | -2.3995 |
| C  | -2.7903 | 0.4598  | -2.0426 | H | 2.4532  | 2.4404  | -1.2820 |
| H  | -3.4573 | 0.2294  | -2.8835 | H | 2.8606  | 1.6528  | -2.8249 |
| H  | -1.7635 | 0.4170  | -2.4195 | H | 1.2868  | 1.3357  | -2.0438 |
| C  | -2.4127 | -1.9272 | -1.7185 | H | 2.4064  | 2.7038  | 1.9372  |
| H  | -2.5538 | -2.7859 | -1.0609 | H | 2.7873  | 2.1368  | 3.5826  |
| H  | -2.9503 | -2.1055 | -2.6568 | H | 1.2197  | 1.7288  | 2.8313  |
| H  | -1.3480 | -1.8100 | -1.9269 | H | 3.2824  | -0.2468 | 3.9860  |
| C  | -4.3931 | -0.8879 | -0.7177 | H | 1.6631  | -0.6006 | 3.3262  |
| H  | -4.8584 | 0.0950  | -0.6213 | H | 3.0946  | -1.4158 | 2.6506  |
| H  | -4.8641 | -1.3909 | -1.5720 | C | 2.0839  | -2.9054 | -0.6501 |
| C  | -4.6450 | -1.6802 | 0.5713  | H | 4.0746  | -2.0781 | -0.6518 |
| H  | -4.1335 | -2.6497 | 0.5526  | H | 3.6335  | -2.8383 | -2.1648 |
| H  | -5.7156 | -1.9149 | 0.5982  | N | 2.5304  | -4.0141 | 0.2130  |
| C  | -4.3163 | -0.9007 | 1.8505  | H | 1.3438  | -3.2447 | -1.4035 |
| H  | -4.7971 | -1.3667 | 2.7201  | H | 1.5551  | -2.1984 | -0.0025 |
| H  | -4.7065 | 0.1185  | 1.7644  | C | 3.1118  | -5.1245 | -0.5623 |
| C  | -2.3320 | -2.0639 | 2.7466  | C | 1.4125  | -4.5021 | 1.0389  |
| H  | -2.4985 | -2.9003 | 2.0655  | H | 3.4195  | -5.9188 | 0.1247  |
| H  | -2.8506 | -2.2628 | 3.6916  | H | 3.9984  | -4.7890 | -1.1064 |
| H  | -1.2611 | -1.9671 | 2.9344  | H | 2.3969  | -5.5538 | -1.2896 |
| C  | -2.6117 | 0.3320  | 3.1076  | H | 0.5852  | -4.9228 | 0.4365  |
|    |         |         |         | H | 1.0156  | -3.6793 | 1.6428  |
|    |         |         |         | H | 1.7728  | -5.2839 | 1.7149  |

**O<sup>MeAN</sup> with axial N uncoordinated**

|    |         |         |         |   |         |         |         |
|----|---------|---------|---------|---|---------|---------|---------|
| Cu | -1.3783 | -0.3677 | 0.4027  | H | -1.3749 | 0.5721  | 3.1694  |
| Cu | 1.4350  | 0.1266  | 0.4058  | H | -2.7795 | 1.3831  | 2.4292  |
| O  | 0.0342  | -0.1482 | -0.7166 | H | 5.4347  | 1.7250  | 0.3815  |
| O  | 0.0219  | -0.0905 | 1.5149  | C | 4.3794  | 1.4300  | 0.3771  |
| N  | -2.1195 | 3.9086  | 0.0565  | C | 4.1498  | 0.5543  | -0.8527 |
| N  | -2.6231 | -0.5757 | -1.1458 | H | 3.8069  | 2.3634  | 0.3260  |
| N  | -2.5847 | -0.6841 | 1.9583  | C | 4.0970  | 0.6695  | 1.6703  |
| C  | -2.7740 | 4.9643  | -0.7373 | N | 2.6968  | 0.2506  | -1.1358 |
| H  | -3.0566 | 5.7881  | -0.0748 | H | 4.6782  | -0.3904 | -0.7160 |
| H  | -3.6851 | 4.5838  | -1.2060 | H | 4.5606  | 1.0311  | -1.7496 |
| H  | -2.1156 | 5.3680  | -1.5298 | N | 2.6305  | 0.4891  | 1.9607  |
| C  | -0.9690 | 4.4668  | 0.7876  | H | 4.5383  | 1.1838  | 2.5321  |
| H  | -0.1883 | 4.8706  | 0.1154  | H | 4.5468  | -0.3259 | 1.6156  |
| H  | -0.5180 | 3.6892  | 1.4125  | C | 2.5977  | -1.0319 | -1.9519 |
| H  | -1.3094 | 5.2777  | 1.4392  | C | 2.1441  | 1.3765  | -1.9716 |
| C  | -1.6929 | 2.7683  | -0.7757 | C | 2.0840  | 1.7470  | 2.5779  |
| H  | -1.0175 | 3.0915  | -1.5936 | C | 2.4724  | -0.6437 | 2.9346  |
| H  | -1.1040 | 2.1062  | -0.1332 | C | 2.9864  | -2.3295 | -1.2173 |
| C  | -2.8837 | 1.9956  | -1.3738 | H | 3.2505  | -0.8832 | -2.8208 |
| H  | -3.6346 | 1.8572  | -0.5866 | H | 1.5684  | -1.0888 | -2.3122 |
| H  | -3.3663 | 2.6074  | -2.1432 | H | 2.2867  | 2.3230  | -1.4473 |
| C  | -2.5084 | 0.6543  | -2.0361 | H | 2.6757  | 1.4128  | -2.9280 |
| H  | -3.1605 | 0.4603  | -2.8964 | H | 1.0824  | 1.2085  | -2.1420 |
| H  | -1.4782 | 0.6791  | -2.3972 | H | 2.2221  | 2.5872  | 1.8952  |
| C  | -2.0701 | -1.7524 | -1.9076 | H | 2.6144  | 1.9530  | 3.5135  |
| H  | -2.2311 | -2.6666 | -1.3344 | H | 1.0223  | 1.6095  | 2.7764  |
| H  | -2.5870 | -1.8374 | -2.8690 | H | 3.0605  | -0.4321 | 3.8340  |
| H  | -1.0041 | -1.6046 | -2.0704 | H | 1.4201  | -0.7435 | 3.1951  |
| C  | -4.0820 | -0.8470 | -0.8619 | H | 2.8289  | -1.5691 | 2.4770  |
| H  | -4.5973 | 0.1103  | -0.7689 | C | 1.8327  | -3.0274 | -0.4711 |
| H  | -4.4925 | -1.3543 | -1.7423 | H | 3.8019  | -2.1558 | -0.5055 |
| C  | -4.3342 | -1.6684 | 0.4001  | H | 3.3914  | -3.0080 | -1.9759 |
| H  | -3.7756 | -2.6113 | 0.3895  | N | 2.3100  | -4.0649 | 0.4626  |
| H  | -5.3939 | -1.9470 | 0.4080  | H | 1.1150  | -3.4403 | -1.2086 |
| C  | -4.0503 | -0.8617 | 1.6647  | H | 1.2728  | -2.2999 | 0.1256  |
| H  | -4.5024 | -1.3379 | 2.5428  | C | 2.9529  | -5.1921 | -0.2372 |
| H  | -4.4887 | 0.1359  | 1.5687  | C | 1.1977  | -4.5552 | 1.2947  |
| C  | -2.0454 | -1.9302 | 2.6059  | H | 3.2764  | -5.9333 | 0.5000  |
| H  | -2.1733 | -2.7852 | 1.9398  | H | 3.8376  | -4.8521 | -0.7813 |
| H  | -2.5863 | -2.1180 | 3.5394  | H | 2.2719  | -5.6903 | -0.9529 |
| H  | -0.9864 | -1.7870 | 2.8149  | H | 0.3985  | -5.0385 | 0.7015  |
| C  | -2.4267 | 0.4678  | 2.9087  | H | 0.7588  | -3.7207 | 1.8507  |
| H  | -3.0183 | 0.2772  | 3.8106  | H | 1.5767  | -5.2869 | 2.0149  |

O<sup>MeAN</sup>-2H<sup>+</sup>

|    |         |         |         |   |         |         |         |
|----|---------|---------|---------|---|---------|---------|---------|
| Cu | -1.3502 | -0.3729 | 0.7801  | H | -1.1898 | 0.3853  | 3.6095  |
| Cu | 1.4545  | 0.1698  | 0.7529  | H | -2.5425 | 1.3632  | 2.9913  |
| O  | 0.0498  | -0.1457 | -0.3539 | H | -3.3814 | 4.0836  | -1.2351 |
| O  | 0.0558  | -0.0636 | 1.8666  | H | 5.6550  | 1.3479  | 0.7582  |
| N  | -2.3901 | 3.9505  | -1.0042 | C | 4.5612  | 1.2809  | 0.7451  |
| N  | -2.6095 | -0.7545 | -0.7371 | C | 4.1771  | 0.4634  | -0.4862 |
| N  | -2.5441 | -0.6708 | 2.3538  | H | 4.2071  | 2.3149  | 0.6843  |
| C  | -1.5802 | 4.5144  | -2.1499 | C | 4.1355  | 0.6037  | 2.0440  |
| H  | -1.8249 | 5.5706  | -2.2551 | N | 2.7009  | 0.4411  | -0.7901 |
| H  | -1.8291 | 3.9894  | -3.0697 | H | 4.5043  | -0.5667 | -0.3341 |
| H  | -0.5225 | 4.3917  | -1.9163 | H | 4.6864  | 0.8479  | -1.3783 |
| C  | -2.1304 | 4.7248  | 0.2707  | N | 2.6500  | 0.5941  | 2.2974  |
| H  | -1.0947 | 4.5634  | 0.5696  | H | 4.6062  | 1.0923  | 2.9055  |
| H  | -2.8092 | 4.3666  | 1.0436  | H | 4.4648  | -0.4393 | 2.0350  |
| H  | -2.3070 | 5.7821  | 0.0781  | C | 2.4240  | -0.5426 | -1.9168 |
| C  | -2.1700 | 2.4556  | -0.7861 | C | 2.2799  | 1.7956  | -1.3049 |
| H  | -1.0913 | 2.3047  | -0.7064 | C | 2.1923  | 1.9509  | 2.7594  |
| H  | -2.6310 | 2.2448  | 0.1802  | C | 2.3820  | -0.4000 | 3.3924  |
| C  | -2.7878 | 1.6014  | -1.8994 | C | 2.8627  | -2.0079 | -1.7398 |
| H  | -3.8796 | 1.6724  | -1.8654 | H | 2.9367  | -0.1470 | -2.8018 |
| H  | -2.4900 | 1.9935  | -2.8781 | H | 1.3489  | -0.4984 | -2.0997 |
| C  | -2.3172 | 0.1360  | -1.9352 | H | 2.4025  | 2.5526  | -0.5307 |
| H  | -2.7903 | -0.3425 | -2.8010 | H | 2.8956  | 2.0694  | -2.1673 |
| H  | -1.2351 | 0.1013  | -2.0753 | H | 1.2336  | 1.7517  | -1.6045 |
| C  | -2.1894 | -2.1467 | -1.1411 | H | 2.4256  | 2.7071  | 2.0086  |
| H  | -2.3137 | -2.8424 | -0.3116 | H | 2.7037  | 2.2095  | 3.6922  |
| H  | -2.8020 | -2.4867 | -1.9820 | H | 1.1160  | 1.9216  | 2.9271  |
| H  | -1.1431 | -2.1226 | -1.4417 | H | 2.9598  | -0.1198 | 4.2793  |
| C  | -4.0869 | -0.7505 | -0.4404 | H | 1.3192  | -0.4023 | 3.6253  |
| H  | -4.4203 | 0.2877  | -0.3970 | H | 2.6860  | -1.3950 | 3.0617  |
| H  | -4.5904 | -1.2251 | -1.2914 | C | 2.0804  | -2.7869 | -0.6771 |
| C  | -4.4758 | -1.4418 | 0.8646  | H | 3.9390  | -2.0844 | -1.5530 |
| H  | -4.1428 | -2.4841 | 0.8964  | H | 2.6919  | -2.4559 | -2.7245 |
| H  | -5.5705 | -1.4866 | 0.8892  | N | 2.4932  | -4.2530 | -0.5919 |
| C  | -4.0289 | -0.6603 | 2.0970  | H | 1.0078  | -2.7803 | -0.8778 |
| H  | -4.5141 | -1.0563 | 2.9972  | H | 2.2438  | -2.3849 | 0.3240  |
| H  | -4.3255 | 0.3878  | 1.9952  | C | 2.2468  | -5.0227 | -1.8712 |
| C  | -2.1153 | -2.0028 | 2.9040  | C | 1.8164  | -4.9310 | 0.5800  |
| H  | -2.3617 | -2.8013 | 2.2034  | H | 3.5025  | -4.2790 | -0.4102 |
| H  | -2.6329 | -2.1919 | 3.8500  | H | 2.5238  | -6.0624 | -1.7026 |
| H  | -1.0387 | -1.9839 | 3.0726  | H | 2.8567  | -4.6092 | -2.6711 |
| C  | -2.2538 | 0.3863  | 3.3823  | H | 1.1877  | -4.9503 | -2.1192 |
| H  | -2.8308 | 0.1732  | 4.2885  | H | 0.7433  | -4.9523 | 0.3916  |
|    |         |         |         | H | 2.0331  | -4.3678 | 1.4868  |
|    |         |         |         | H | 2.2030  | -5.9455 | 0.6666  |

**O<sup>MeAN</sup>-2H<sup>+</sup> (O-protonated)**

|    |         |         |         |   |         |         |         |
|----|---------|---------|---------|---|---------|---------|---------|
| Cu | -1.4305 | -0.4204 | 0.9383  | C | -2.4654 | 0.1781  | 3.5936  |
| Cu | 1.5476  | 0.4809  | 0.7337  | H | -3.1128 | -0.0366 | 4.4512  |
| O  | -0.0950 | 0.2699  | -0.3261 | H | -1.4463 | 0.2897  | 3.9606  |
| O  | 0.2057  | -0.1985 | 1.9881  | H | -2.7861 | 1.1112  | 3.1270  |
| N  | 2.1336  | -3.9251 | 1.3602  | C | 2.9936  | -5.0760 | 1.5893  |
| N  | 2.9878  | 0.6407  | 2.2349  | H | 3.3139  | -5.1099 | 2.6292  |
| N  | 2.6328  | 1.1636  | -0.8821 | H | 3.8728  | -5.0017 | 0.9343  |
| N  | -2.4410 | 3.9292  | -0.3568 | H | 2.4546  | -5.9905 | 1.3225  |
| N  | -2.8068 | -0.8206 | -0.5679 | C | 1.3714  | -3.8478 | 0.1216  |
| N  | -2.5505 | -0.9387 | 2.5936  | H | 1.0107  | -2.8313 | -0.0351 |
| C  | -3.1404 | 5.0525  | -0.9612 | H | 1.9865  | -4.1831 | -0.7178 |
| H  | -4.2036 | 5.0018  | -0.6819 | H | 0.5088  | -4.5256 | 0.2006  |
| H  | -3.0526 | 5.0127  | -2.0456 | C | 2.0508  | -2.8481 | 2.3381  |
| H  | -2.7345 | 5.9895  | -0.5715 | H | 1.9987  | -3.2945 | 3.3359  |
| C  | -2.0673 | 4.0034  | 1.0486  | H | 1.1461  | -2.2694 | 2.1392  |
| H  | -1.1996 | 4.6714  | 1.1422  | C | 3.2923  | -1.9023 | 2.2554  |
| H  | -1.8014 | 3.0142  | 1.4218  | H | 4.1719  | -2.4329 | 2.6287  |
| H  | -2.8863 | 4.4333  | 1.6320  | H | 3.4958  | -1.6603 | 1.2074  |
| C  | -2.1665 | 2.7133  | -1.1102 | C | 3.0500  | -0.6144 | 3.0787  |
| H  | -2.0557 | 2.9725  | -2.1648 | H | 3.8542  | -0.4791 | 3.8119  |
| H  | -1.2367 | 2.2771  | -0.7304 | H | 2.1184  | -0.6835 | 3.6414  |
| C  | -3.3110 | 1.6659  | -0.9321 | C | 2.5117  | 1.7687  | 3.1096  |
| H  | -3.5274 | 1.5531  | 0.1352  | H | 3.1488  | 1.8539  | 3.9968  |
| H  | -4.2223 | 2.0475  | -1.3996 | H | 1.4841  | 1.5966  | 3.4273  |
| C  | -2.9091 | 0.3112  | -1.5653 | H | 2.5519  | 2.7080  | 2.5572  |
| H  | -3.6456 | 0.0189  | -2.3231 | C | 4.4029  | 0.9576  | 1.8072  |
| H  | -1.9486 | 0.3944  | -2.0749 | H | 4.9378  | 1.3249  | 2.6922  |
| C  | -2.2083 | -2.0120 | -1.2684 | H | 4.8811  | 0.0211  | 1.5075  |
| H  | -2.1981 | -2.8713 | -0.5967 | C | 4.5150  | 1.9552  | 0.6578  |
| H  | -2.7973 | -2.2651 | -2.1568 | H | 3.9643  | 2.8798  | 0.8633  |
| H  | -1.1849 | -1.7970 | -1.5729 | H | 5.5683  | 2.2506  | 0.5854  |
| C  | -4.2183 | -1.1836 | -0.1626 | C | 4.1175  | 1.3454  | -0.6830 |
| H  | -4.7755 | -0.2541 | -0.0206 | H | 4.4857  | 1.9618  | -1.5130 |
| H  | -4.6773 | -1.7094 | -1.0095 | H | 4.5820  | 0.3594  | -0.7824 |
| C  | -4.3289 | -2.0163 | 1.1117  | C | 2.0263  | 2.4827  | -1.2616 |
| H  | -3.7269 | -2.9302 | 1.0583  | H | 2.4829  | 2.8558  | -2.1855 |
| H  | -5.3692 | -2.3543 | 1.1864  | H | 2.1899  | 3.2112  | -0.4664 |
| C  | -4.0180 | -1.2025 | 2.3649  | H | 0.9555  | 2.3543  | -1.4126 |
| H  | -4.4063 | -1.7045 | 3.2601  | C | 2.4748  | 0.2071  | -2.0296 |
| H  | -4.5184 | -0.2314 | 2.2959  | H | 2.7240  | -0.8041 | -1.7005 |
| C  | -1.9318 | -2.1713 | 3.1861  | H | 3.1436  | 0.4954  | -2.8483 |
| H  | -1.9954 | -2.9982 | 2.4768  | H | 1.4554  | 0.2310  | -2.4113 |
| H  | -2.4577 | -2.4488 | 4.1067  | H | 0.1844  | 0.0531  | 2.9167  |
| H  | -0.8853 | -1.9801 | 3.4142  | H | -0.0462 | -0.0314 | -1.2390 |

**S<sup>p</sup>MeAN-2H<sup>+</sup>**

|    |         |         |         |   |         |         |         |
|----|---------|---------|---------|---|---------|---------|---------|
| Cu | -1.6671 | -0.5332 | 0.7900  | H | -2.7300 | 1.2512  | 2.9808  |
| Cu | 1.7930  | 0.2844  | 0.7509  | H | -3.5489 | 3.9437  | -1.2695 |
| O  | 0.0711  | -0.1977 | -0.0027 | H | 5.8627  | 1.5696  | 0.7864  |
| O  | 0.0802  | -0.1561 | 1.4974  | C | 4.7726  | 1.4544  | 0.7678  |
| N  | -2.5652 | 3.7880  | -1.0215 | C | 4.4378  | 0.6564  | -0.4992 |
| N  | -2.8614 | -0.9166 | -0.7680 | H | 4.3762  | 2.4744  | 0.7222  |
| N  | -2.7924 | -0.8054 | 2.4140  | C | 4.3764  | 0.7556  | 2.0731  |
| C  | -1.7241 | 4.3275  | -2.1566 | N | 2.9685  | 0.5936  | -0.8327 |
| H  | -1.9280 | 5.3928  | -2.2572 | H | 4.7941  | -0.3679 | -0.3682 |
| H  | -1.9849 | 3.8183  | -3.0820 | H | 4.9602  | 1.0825  | -1.3655 |
| H  | -0.6739 | 4.1630  | -1.9145 | N | 2.8951  | 0.7311  | 2.3483  |
| C  | -2.3079 | 4.5616  | 0.2542  | H | 4.8691  | 1.2375  | 2.9272  |
| H  | -1.2812 | 4.3773  | 0.5700  | H | 4.7112  | -0.2860 | 2.0436  |
| H  | -3.0076 | 4.2237  | 1.0175  | C | 2.7218  | -0.3940 | -1.9581 |
| H  | -2.4559 | 5.6218  | 0.0540  | C | 2.5164  | 1.9329  | -1.3546 |
| C  | -2.3834 | 2.2887  | -0.7946 | C | 2.4259  | 2.0702  | 2.8390  |
| H  | -1.3074 | 2.1198  | -0.6989 | C | 2.6209  | -0.2863 | 3.4171  |
| H  | -2.8654 | 2.0910  | 0.1647  | C | 3.1365  | -1.8628 | -1.7529 |
| C  | -3.0041 | 1.4470  | -1.9157 | H | 3.2645  | -0.0187 | -2.8351 |
| H  | -4.0952 | 1.5287  | -1.8847 | H | 1.6533  | -0.3421 | -2.1865 |
| H  | -2.6987 | 1.8425  | -2.8906 | H | 2.6566  | 2.7051  | -0.5987 |
| C  | -2.5580 | -0.0264 | -1.9593 | H | 3.0946  | 2.2026  | -2.2453 |
| H  | -3.0358 | -0.4842 | -2.8346 | H | 1.4584  | 1.8788  | -1.6176 |
| H  | -1.4758 | -0.0782 | -2.1094 | H | 2.6404  | 2.8438  | 2.1001  |
| C  | -2.4456 | -2.3067 | -1.1777 | H | 2.9344  | 2.3237  | 3.7760  |
| H  | -2.6099 | -3.0131 | -0.3643 | H | 1.3488  | 2.0293  | 3.0127  |
| H  | -3.0270 | -2.6297 | -2.0482 | H | 3.1841  | -0.0354 | 4.3231  |
| H  | -1.3860 | -2.3009 | -1.4380 | H | 1.5548  | -0.2951 | 3.6462  |
| C  | -4.3343 | -0.9111 | -0.4473 | H | 2.9252  | -1.2758 | 3.0699  |
| H  | -4.6683 | 0.1281  | -0.4185 | C | 2.3231  | -2.6168 | -0.6961 |
| H  | -4.8614 | -1.4053 | -1.2736 | H | 4.2068  | -1.9451 | -1.5372 |
| C  | -4.6966 | -1.5763 | 0.8874  | H | 2.9860  | -2.3225 | -2.7351 |
| H  | -4.3390 | -2.6105 | 0.9353  | N | 2.6557  | -4.1051 | -0.6391 |
| H  | -5.7901 | -1.6491 | 0.9143  | H | 1.2485  | -2.5440 | -0.8787 |
| C  | -4.2717 | -0.7791 | 2.1265  | H | 2.5296  | -2.2457 | 0.3091  |
| H  | -4.7929 | -1.1557 | 3.0157  | C | 2.3296  | -4.8487 | -1.9159 |
| H  | -4.5525 | 0.2713  | 2.0005  | C | 1.9808  | -4.7570 | 0.5487  |
| C  | -2.3991 | -2.1230 | 3.0173  | H | 3.6673  | -4.1869 | -0.4891 |
| H  | -2.6562 | -2.9416 | 2.3440  | H | 2.5571  | -5.9029 | -1.7631 |
| H  | -2.9231 | -2.2692 | 3.9687  | H | 2.9368  | -4.4611 | -2.7309 |
| H  | -1.3218 | -2.1295 | 3.1934  | H | 1.2690  | -4.7192 | -2.1310 |
| C  | -2.4732 | 0.2782  | 3.4031  | H | 0.9021  | -4.7115 | 0.4002  |
| H  | -3.0484 | 0.1249  | 4.3232  | H | 2.2643  | -4.2196 | 1.4529  |
| H  | -1.4080 | 0.2548  | 3.6362  | H | 2.3083  | -5.7939 | 0.6103  |



**O<sup>MeAN</sup>-2BMe<sub>3</sub>**

|    |         |         |         |   |         |         |         |
|----|---------|---------|---------|---|---------|---------|---------|
| Cu | -1.3872 | -0.4370 | 0.5621  | C | 2.4918  | -0.5231 | -1.9561 |
| Cu | 1.3815  | 0.2602  | 0.6262  | C | 2.2335  | 1.8385  | -1.4658 |
| O  | 0.0342  | -0.1323 | -0.5248 | C | 1.9465  | 2.1882  | 2.5397  |
| O  | -0.0480 | -0.0110 | 1.6934  | C | 2.2027  | -0.0972 | 3.3537  |
| N  | -2.4226 | 3.9115  | -1.0259 | C | 3.0267  | -1.9423 | -1.6971 |
| N  | -2.5570 | -0.8864 | -0.9937 | H | 2.9886  | -0.1293 | -2.8518 |
| N  | -2.5920 | -0.8488 | 2.1051  | H | 1.4172  | -0.5557 | -2.1484 |
| C  | -2.2840 | 4.5182  | -2.3888 | H | 2.3026  | 2.6401  | -0.7303 |
| H  | -2.4936 | 5.5859  | -2.3182 | H | 2.8672  | 2.0900  | -2.3226 |
| H  | -2.9978 | 4.0707  | -3.0768 | H | 1.2001  | 1.7381  | -1.7945 |
| H  | -1.2655 | 4.3721  | -2.7663 | H | 2.1630  | 2.8939  | 1.7369  |
| C  | -1.3932 | 4.5576  | -0.1414 | H | 2.4133  | 2.5476  | 3.4628  |
| H  | -0.3865 | 4.3157  | -0.5003 | H | 0.8679  | 2.1153  | 2.6783  |
| H  | -1.5145 | 4.1937  | 0.8797  | H | 2.7079  | 0.2823  | 4.2482  |
| H  | -1.5283 | 5.6368  | -0.1548 | H | 1.1289  | -0.1438 | 3.5229  |
| C  | -2.0479 | 2.4432  | -1.0705 | H | 2.5788  | -1.0950 | 3.1213  |
| H  | -1.0088 | 2.3860  | -1.4162 | C | 2.3562  | -2.6693 | -0.5258 |
| H  | -2.0645 | 2.1072  | -0.0329 | H | 4.1109  | -1.9404 | -1.5787 |
| C  | -2.9163 | 1.5403  | -1.9546 | H | 2.8297  | -2.4771 | -2.6328 |
| H  | -3.9468 | 1.5356  | -1.6005 | N | 2.5927  | -4.1631 | -0.4238 |
| H  | -2.9523 | 1.9500  | -2.9700 | H | 1.2706  | -2.5180 | -0.5793 |
| C  | -2.3719 | 0.1103  | -2.1345 | H | 2.7039  | -2.2590 | 0.4249  |
| H  | -2.8701 | -0.3421 | -3.0012 | C | 1.9958  | -4.8567 | -1.6095 |
| H  | -1.2993 | 0.1383  | -2.3377 | C | 1.8242  | -4.6064 | 0.7891  |
| C  | -1.9812 | -2.1945 | -1.4759 | H | 2.1252  | -5.9322 | -1.4869 |
| H  | -2.0871 | -2.9637 | -0.7103 | H | 2.5017  | -4.5498 | -2.5222 |
| H  | -2.5126 | -2.5186 | -2.3766 | H | 0.9270  | -4.6251 | -1.6846 |
| H  | -0.9260 | -2.0522 | -1.7041 | H | 0.7864  | -4.2613 | 0.7217  |
| C  | -4.0277 | -1.0713 | -0.7228 | H | 2.2892  | -4.1903 | 1.6834  |
| H  | -4.4829 | -0.0829 | -0.6509 | H | 1.8379  | -5.6923 | 0.8513  |
| H  | -4.4569 | -1.5719 | -1.5994 | B | -4.0725 | 4.2478  | -0.3447 |
| C  | -4.3517 | -1.8474 | 0.5520  | C | -4.0570 | 5.7987  | 0.1642  |
| H  | -3.8660 | -2.8287 | 0.5747  | H | -3.7512 | 6.5257  | -0.6050 |
| H  | -5.4282 | -2.0530 | 0.5401  | H | -5.0906 | 6.0633  | 0.4372  |
| C  | -4.0573 | -1.0350 | 1.8097  | H | -3.4432 | 5.9832  | 1.0578  |
| H  | -4.5076 | -1.5076 | 2.6911  | C | -5.1798 | 4.0630  | -1.5285 |
| H  | -4.4942 | -0.0371 | 1.7087  | H | -5.0902 | 4.8088  | -2.3325 |
| C  | -2.0189 | -2.1122 | 2.6860  | H | -5.2273 | 3.0746  | -2.0048 |
| H  | -2.1405 | -2.9403 | 1.9865  | H | -6.1671 | 4.2279  | -1.0681 |
| H  | -2.5419 | -2.3556 | 3.6168  | C | -4.2716 | 3.2109  | 0.8975  |
| H  | -0.9596 | -1.9578 | 2.8888  | H | -4.3603 | 2.1532  | 0.6036  |
| C  | -2.4638 | 0.2497  | 3.1224  | H | -3.4841 | 3.2802  | 1.6651  |
| H  | -3.0281 | -0.0251 | 4.0200  | H | -5.2144 | 3.4684  | 1.4038  |
| H  | -1.4133 | 0.3874  | 3.3707  | B | 4.3347  | -4.6377 | -0.2139 |
| H  | -2.8682 | 1.1753  | 2.7095  | C | 4.9890  | -3.5444 | 0.8029  |
| H  | 5.5306  | 1.6126  | 0.7633  | H | 5.9953  | -3.9005 | 1.0731  |
| C  | 4.4411  | 1.5086  | 0.7042  | H | 5.1288  | -2.5410 | 0.3723  |
| C  | 4.1407  | 0.6243  | -0.5046 | H | 4.4445  | -3.4244 | 1.7532  |
| H  | 4.0571  | 2.5263  | 0.5796  | C | 5.0470  | -4.6658 | -1.6809 |
| C  | 3.9782  | 0.8794  | 2.0152  | H | 5.0326  | -3.7244 | -2.2463 |
| N  | 2.6837  | 0.5292  | -0.8703 | H | 6.1093  | -4.9064 | -1.5147 |
| H  | 4.5003  | -0.3843 | -0.2949 | H | 4.6568  | -5.4527 | -2.3438 |
| H  | 4.6741  | 0.9903  | -1.3907 | C | 4.3279  | -6.1363 | 0.4337  |
| N  | 2.4839  | 0.8252  | 2.2010  | H | 5.3670  | -6.5010 | 0.4221  |
| H  | 4.3906  | 1.4285  | 2.8704  | H | 3.9945  | -6.1831 | 1.4806  |
| H  | 4.3452  | -0.1499 | 2.0745  | H | 3.7412  | -6.8751 | -0.1353 |

<sup>S</sup>P<sup>MeAN</sup>-2BMe<sub>3</sub>

|    |         |         |         |   |         |         |         |
|----|---------|---------|---------|---|---------|---------|---------|
| Cu | -1.6359 | -0.6574 | 0.5507  | C | 2.8811  | -0.3554 | -2.1387 |
| Cu | 1.7590  | 0.4153  | 0.4706  | C | 2.2724  | 1.9574  | -1.7770 |
| O  | 0.0620  | -0.1831 | -0.2698 | C | 2.0934  | 2.2575  | 2.5805  |
| O  | 0.0738  | -0.1077 | 1.2279  | C | 2.6788  | -0.0373 | 3.1389  |
| N  | -2.5617 | 3.6231  | -0.8957 | C | 3.3980  | -1.7431 | -1.7162 |
| N  | -2.8325 | -1.1361 | -0.9722 | H | 3.4778  | -0.0062 | -2.9918 |
| N  | -2.6566 | -1.0470 | 2.2225  | H | 1.8429  | -0.4334 | -2.4757 |
| C  | -2.2799 | 4.1972  | -2.2506 | H | 2.3083  | 2.8262  | -1.1203 |
| H  | -2.3770 | 5.2817  | -2.1963 | H | 2.8024  | 2.1954  | -2.7062 |
| H  | -2.9960 | 3.8226  | -2.9784 | H | 1.2310  | 1.7266  | -2.0064 |
| H  | -1.2630 | 3.9385  | -2.5668 | H | 2.1865  | 3.0677  | 1.8557  |
| C  | -1.5161 | 4.1589  | 0.0412  | H | 2.5450  | 2.5744  | 3.5275  |
| H  | -0.5256 | 3.7982  | -0.2590 | H | 1.0361  | 2.0395  | 2.7393  |
| H  | -1.7341 | 3.8245  | 1.0562  | H | 3.1833  | 0.3004  | 4.0517  |
| H  | -1.5256 | 5.2462  | 0.0128  | H | 1.6277  | -0.2301 | 3.3588  |
| C  | -2.3519 | 2.1220  | -0.9165 | H | 3.1513  | -0.9570 | 2.7885  |
| H  | -1.3097 | 1.9480  | -1.2142 | C | 2.4162  | -2.5438 | -0.8508 |
| H  | -2.4584 | 1.8013  | 0.1223  | H | 4.3701  | -1.6726 | -1.2263 |
| C  | -3.2770 | 1.3050  | -1.8264 | H | 3.5749  | -2.2735 | -2.6573 |
| H  | -4.2951 | 1.3014  | -1.4345 | N | 2.7048  | -4.0240 | -0.6910 |
| H  | -3.3379 | 1.7740  | -2.8138 | H | 1.4081  | -2.4586 | -1.2769 |
| C  | -2.7789 | -0.1246 | -2.1056 | H | 2.3761  | -2.1428 | 0.1639  |
| H  | -3.3751 | -0.5452 | -2.9266 | C | 2.5946  | -4.7114 | -2.0180 |
| H  | -1.7371 | -0.0936 | -2.4385 | C | 1.6000  | -4.5565 | 0.1774  |
| C  | -2.2376 | -2.4089 | -1.5155 | H | 2.7458  | -5.7808 | -1.8698 |
| H  | -2.2970 | -3.2067 | -0.7747 | H | 3.3588  | -4.3462 | -2.7003 |
| H  | -2.7842 | -2.7219 | -2.4122 | H | 1.6021  | -4.5407 | -2.4499 |
| H  | -1.1916 | -2.2369 | -1.7755 | H | 0.6269  | -4.2880 | -0.2487 |
| C  | -4.2647 | -1.3920 | -0.5755 | H | 1.6906  | -4.1338 | 1.1785  |
| H  | -4.7699 | -0.4271 | -0.5053 | H | 1.6768  | -5.6398 | 0.2382  |
| H  | -4.7402 | -1.9539 | -1.3898 | B | -4.1982 | 4.1495  | -0.3073 |
| C  | -4.4393 | -2.1358 | 0.7548  | C | -4.0385 | 5.7036  | 0.1659  |
| H  | -3.8802 | -3.0783 | 0.7658  | H | -3.6178 | 6.3722  | -0.6021 |
| H  | -5.4953 | -2.4234 | 0.8205  | H | -5.0492 | 6.0854  | 0.3792  |
| C  | -4.1260 | -1.2836 | 1.9904  | H | -3.4530 | 5.8460  | 1.0859  |
| H  | -4.5390 | -1.7509 | 2.8934  | C | -5.2551 | 4.0440  | -1.5446 |
| H  | -4.5985 | -0.3024 | 1.8819  | H | -5.0464 | 4.7484  | -2.3638 |
| C  | -2.0254 | -2.2575 | 2.8490  | H | -5.3796 | 3.0487  | -1.9914 |
| H  | -2.1783 | -3.1371 | 2.2236  | H | -6.2423 | 4.3254  | -1.1446 |
| H  | -2.4713 | -2.4408 | 3.8334  | C | -4.5709 | 3.1740  | 0.9439  |
| H  | -0.9542 | -2.0824 | 2.9642  | H | -4.7837 | 2.1303  | 0.6659  |
| C  | -2.4905 | 0.1086  | 3.1652  | H | -3.8141 | 3.1607  | 1.7448  |
| H  | -3.0024 | -0.1046 | 4.1108  | H | -5.4927 | 3.5599  | 1.4061  |
| H  | -1.4290 | 0.2692  | 3.3580  | B | 4.2988  | -4.4021 | 0.0912  |
| H  | -2.9196 | 1.0103  | 2.7238  | C | 4.4958  | -3.3058 | 1.2813  |
| H  | 5.5453  | 2.3403  | 0.4836  | H | 5.3850  | -3.5964 | 1.8615  |
| C  | 4.5001  | 2.0096  | 0.4690  | H | 4.6813  | -2.2786 | 0.9315  |
| C  | 4.3395  | 1.1063  | -0.7615 | H | 3.6617  | -3.2700 | 2.0006  |
| H  | 3.9072  | 2.9268  | 0.3779  | C | 5.4661  | -4.3394 | -1.0463 |
| C  | 4.2344  | 1.3035  | 1.8035  | H | 5.5805  | -3.3829 | -1.5733 |
| N  | 2.9128  | 0.7663  | -1.1130 | H | 6.4229  | -4.5214 | -0.5313 |
| H  | 4.8713  | 0.1702  | -0.5805 | H | 5.3773  | -5.1262 | -1.8105 |
| H  | 4.7946  | 1.5802  | -1.6410 | C | 4.1753  | -5.9183 | 0.6834  |
| N  | 2.7803  | 1.0198  | 2.0780  | H | 5.1794  | -6.2196 | 1.0208  |
| H  | 4.6250  | 1.9024  | 2.6362  | H | 3.5124  | -6.0182 | 1.5552  |
| H  | 4.7589  | 0.3432  | 1.8153  | H | 3.8655  | -6.6725 | -0.0576 |

**O<sup>MeAN</sup>-Sc(OTf)<sub>2</sub>**

|    |         |         |         |    |         |         |         |
|----|---------|---------|---------|----|---------|---------|---------|
| Cu | -1.3534 | -0.2854 | 0.4712  | H  | 4.1164  | 1.7311  | 2.2438  |
| Cu | 1.4108  | 0.3264  | 0.7356  | H  | 4.4683  | 0.2857  | 3.1895  |
| O  | 0.0806  | 0.2574  | -0.4972 | N  | 2.8032  | 0.4140  | -0.6902 |
| O  | -0.0837 | 0.0363  | 1.7155  | H  | 4.8762  | 0.4536  | -1.0760 |
| N  | -2.7156 | 4.0621  | -0.8311 | H  | 4.2746  | 1.8116  | -0.1201 |
| N  | -2.4250 | -0.6246 | -1.1872 | C  | 1.8947  | 1.3242  | 3.4159  |
| N  | -2.6032 | -0.9954 | 1.8589  | C  | 2.3490  | -1.0306 | 2.9867  |
| C  | -4.2157 | 4.1298  | -0.7658 | C  | 2.7619  | -0.9392 | -1.3473 |
| H  | -4.5173 | 5.1609  | -0.5754 | C  | 2.3884  | 1.4457  | -1.6986 |
| H  | -4.5703 | 3.4905  | 0.0430  | C  | 1.8225  | 2.8024  | 2.9728  |
| H  | -4.6594 | 3.8035  | -1.7112 | H  | 2.5019  | 1.2377  | 4.3243  |
| C  | -2.2424 | 4.8303  | -2.0306 | H  | 0.8985  | 0.9408  | 3.6436  |
| H  | -2.6435 | 4.4017  | -2.9532 | H  | 2.8511  | -1.7604 | 2.3515  |
| H  | -1.1523 | 4.8203  | -2.0726 | H  | 2.7978  | -1.0634 | 3.9847  |
| H  | -2.5965 | 5.8595  | -1.9693 | H  | 1.2886  | -1.2677 | 3.0496  |
| C  | -2.2477 | 2.6205  | -0.8915 | H  | 3.0945  | -1.7098 | -0.6518 |
| H  | -1.1542 | 2.6324  | -0.8888 | H  | 3.4224  | -0.9386 | -2.2206 |
| H  | -2.5864 | 2.1624  | 0.0441  | H  | 1.7395  | -1.1460 | -1.6597 |
| C  | -2.7436 | 1.8134  | -2.1069 | H  | 3.0792  | 1.4227  | -2.5483 |
| H  | -3.8354 | 1.7577  | -2.1167 | H  | 1.3767  | 1.2292  | -2.0373 |
| H  | -2.4599 | 2.3292  | -3.0308 | H  | 2.4199  | 2.4337  | -1.2379 |
| C  | -2.1233 | 0.4142  | -2.2573 | C  | 0.4156  | 3.2144  | 2.4818  |
| H  | -2.4778 | -0.0128 | -3.2038 | H  | 2.5720  | 3.0056  | 2.2036  |
| H  | -1.0350 | 0.4884  | -2.3044 | H  | 2.1011  | 3.4184  | 3.8327  |
| C  | -1.8418 | -1.9241 | -1.6834 | N  | 0.3261  | 4.5853  | 1.8477  |
| H  | -2.0038 | -2.7203 | -0.9576 | H  | -0.2701 | 3.1972  | 3.3336  |
| H  | -2.3203 | -2.2066 | -2.6266 | H  | 0.0481  | 2.4939  | 1.7476  |
| H  | -0.7720 | -1.7928 | -1.8423 | C  | 0.7297  | 5.6592  | 2.8181  |
| C  | -3.9161 | -0.7678 | -1.0328 | C  | 1.2134  | 4.6516  | 0.6383  |
| H  | -4.3328 | 0.2286  | -0.8766 | H  | 0.5828  | 6.6333  | 2.3504  |
| H  | -4.3061 | -1.1465 | -1.9857 | H  | 1.7854  | 5.5595  | 3.0885  |
| C  | -4.3588 | -1.6628 | 0.1217  | H  | 0.1122  | 5.5890  | 3.7144  |
| H  | -3.9632 | -2.6795 | 0.0358  | H  | 1.0049  | 3.7957  | -0.0087 |
| H  | -5.4473 | -1.7667 | 0.0457  | H  | 2.2699  | 4.6384  | 0.9221  |
| C  | -4.0611 | -1.0434 | 1.4839  | H  | 1.0190  | 5.5781  | 0.0959  |
| H  | -4.5803 | -1.5950 | 2.2770  | Sc | -1.8571 | 5.0414  | 1.1062  |
| H  | -4.4236 | -0.0106 | 1.5018  | O  | -2.4185 | 8.4855  | -1.3641 |
| C  | -2.0916 | -2.3714 | 2.1789  | S  | -2.0880 | 7.8172  | 0.0643  |
| H  | -2.1700 | -3.0261 | 1.3112  | O  | -0.7687 | 6.7400  | 0.1592  |
| H  | -2.6793 | -2.7980 | 2.9986  | O  | -3.2204 | 6.7374  | 0.7320  |
| H  | -1.0474 | -2.2972 | 2.4814  | C  | -1.7992 | 9.2547  | 1.4551  |
| C  | -2.4849 | -0.1477 | 3.0933  | F  | -3.0217 | 9.6195  | 1.9085  |
| H  | -3.1098 | -0.5766 | 3.8840  | F  | -1.0468 | 8.6986  | 2.4380  |
| H  | -1.4453 | -0.1236 | 3.4136  | F  | -1.1571 | 10.2758 | 0.8427  |
| H  | -2.8182 | 0.8638  | 2.8665  | O  | -2.6912 | 3.0792  | 4.8055  |
| H  | 5.7198  | 0.1672  | 1.1439  | S  | -3.1670 | 3.9225  | 3.5176  |
| C  | 4.6373  | 0.0324  | 1.0402  | O  | -2.8494 | 3.2456  | 1.9812  |
| C  | 3.9829  | 0.6481  | 2.2758  | O  | -2.4158 | 5.4118  | 3.1959  |
| H  | 4.4783  | -1.0503 | 0.9893  | C  | -5.1578 | 4.3216  | 3.6162  |
| C  | 4.2095  | 0.7277  | -0.2498 | F  | -5.2880 | 5.5488  | 4.1695  |
| N  | 2.5081  | 0.3553  | 2.4124  | F  | -5.6174 | 4.2935  | 2.3409  |
|    |         |         |         | F  | -5.7150 | 3.3545  | 4.3786  |

<sup>S</sup>P<sup>MeAN</sup>-Sc(OTf)<sub>2</sub>

|    |         |         |         |    |         |         |         |
|----|---------|---------|---------|----|---------|---------|---------|
| Cu | -1.6086 | -0.3698 | 0.3338  | H  | 4.3867  | 1.7674  | 2.1864  |
| Cu | 1.8165  | 0.2887  | 0.7600  | H  | 4.6815  | 0.4828  | 3.3595  |
| O  | 0.1585  | 0.1424  | -0.1931 | N  | 3.2179  | 0.0867  | -0.6363 |
| O  | -0.0173 | 0.1284  | 1.2684  | H  | 5.3202  | -0.0691 | -0.8494 |
| N  | -2.8153 | 4.0079  | -0.8233 | H  | 4.7492  | 1.4616  | -0.1780 |
| N  | -2.5573 | -0.6532 | -1.3956 | C  | 2.1099  | 1.6124  | 3.2926  |
| N  | -2.8366 | -1.0382 | 1.7488  | C  | 2.4901  | -0.7978 | 3.2682  |
| C  | -4.3185 | 4.0433  | -0.7648 | C  | 3.1224  | -1.3314 | -1.1177 |
| H  | -4.6438 | 5.0566  | -0.5302 | C  | 2.9036  | 1.0050  | -1.7770 |
| H  | -4.6658 | 3.3710  | 0.0189  | C  | 2.0594  | 2.9535  | 2.5174  |
| H  | -4.7468 | 3.7492  | -1.7276 | H  | 2.6681  | 1.7255  | 4.2299  |
| C  | -2.3667 | 4.8341  | -1.9953 | H  | 1.1004  | 1.2834  | 3.5567  |
| H  | -2.8342 | 4.4840  | -2.9203 | H  | 2.9818  | -1.6307 | 2.7637  |
| H  | -1.2820 | 4.7830  | -2.1047 | H  | 2.8849  | -0.7159 | 4.2874  |
| H  | -2.6645 | 5.8725  | -1.8455 | H  | 1.4168  | -0.9918 | 3.3090  |
| C  | -2.3236 | 2.5768  | -0.9391 | H  | 3.3739  | -2.0239 | -0.3127 |
| H  | -1.2276 | 2.6004  | -0.9127 | H  | 3.8139  | -1.4893 | -1.9536 |
| H  | -2.6793 | 2.0740  | -0.0341 | H  | 2.1022  | -1.5299 | -1.4508 |
| C  | -2.7935 | 1.8288  | -2.2031 | H  | 3.6471  | 0.8868  | -2.5741 |
| H  | -3.8851 | 1.7959  | -2.2437 | H  | 1.9153  | 0.7658  | -2.1726 |
| H  | -2.4746 | 2.3855  | -3.0908 | H  | 2.9164  | 2.0385  | -1.4241 |
| C  | -2.2110 | 0.4200  | -2.4103 | C  | 0.5984  | 3.3957  | 2.2862  |
| H  | -2.5577 | 0.0603  | -3.3886 | H  | 2.5742  | 2.8510  | 1.5571  |
| H  | -1.1190 | 0.4686  | -2.4475 | H  | 2.6036  | 3.7179  | 3.0786  |
| C  | -1.9743 | -1.9384 | -1.9174 | N  | 0.3963  | 4.7021  | 1.5519  |
| H  | -2.1769 | -2.7571 | -1.2265 | H  | 0.0967  | 3.5043  | 3.2509  |
| H  | -2.4125 | -2.1822 | -2.8920 | H  | 0.0780  | 2.6081  | 1.7251  |
| H  | -0.8943 | -1.8259 | -2.0266 | C  | 0.8444  | 5.8589  | 2.3987  |
| C  | -4.0498 | -0.7961 | -1.2538 | C  | 1.1535  | 4.7263  | 0.2546  |
| H  | -4.4696 | 0.2015  | -1.1086 | H  | 0.6425  | 6.7869  | 1.8639  |
| H  | -4.4430 | -1.1872 | -2.2016 | H  | 1.9177  | 5.7958  | 2.6050  |
| C  | -4.5018 | -1.6840 | -0.0867 | H  | 0.2922  | 5.8513  | 3.3401  |
| H  | -4.0777 | -2.6911 | -0.1550 | H  | 0.9195  | 3.8304  | -0.3262 |
| H  | -5.5842 | -1.8189 | -0.1988 | H  | 2.2329  | 4.7688  | 0.4299  |
| C  | -4.2737 | -1.0707 | 1.3006  | H  | 0.8616  | 5.6150  | -0.3100 |
| H  | -4.8485 | -1.6233 | 2.0557  | Sc | -1.9130 | 4.9210  | 1.1503  |
| H  | -4.6309 | -0.0358 | 1.3039  | O  | -3.3690 | 8.5019  | -0.6275 |
| C  | -2.3605 | -2.4145 | 2.1064  | S  | -2.7145 | 7.7209  | 0.6188  |
| H  | -2.4253 | -3.0797 | 1.2444  | O  | -1.2643 | 6.8617  | 0.3425  |
| H  | -2.9731 | -2.8243 | 2.9182  | O  | -3.5492 | 6.3829  | 1.2694  |
| H  | -1.3209 | -2.3587 | 2.4350  | C  | -2.3863 | 8.9956  | 2.1671  |
| C  | -2.7289 | -0.1685 | 2.9638  | F  | -3.4433 | 8.8710  | 3.0038  |
| H  | -3.3550 | -0.5695 | 3.7698  | F  | -1.2296 | 8.6080  | 2.7574  |
| H  | -1.6906 | -0.1378 | 3.2981  | F  | -2.2976 | 10.2362 | 1.6381  |
| H  | -3.0646 | 0.8402  | 2.7258  | O  | -3.1241 | 2.7539  | 4.6559  |
| H  | 5.9817  | -0.0372 | 1.4376  | S  | -3.2557 | 3.9769  | 3.6146  |
| C  | 4.8996  | -0.1209 | 1.2823  | O  | -3.4868 | 3.6021  | 1.9683  |
| C  | 4.2248  | 0.7047  | 2.3863  | O  | -1.8877 | 4.9578  | 3.3722  |
| H  | 4.6728  | -1.1882 | 1.3859  | C  | -4.8031 | 5.1899  | 4.1716  |
| C  | 4.6114  | 0.3764  | -0.1398 | F  | -4.3032 | 6.4396  | 4.3080  |
| N  | 2.7391  | 0.4784  | 2.5155  | F  | -5.7362 | 5.1189  | 3.1939  |
|    |         |         |         | F  | -5.2611 | 4.6968  | 5.3457  |

**O<sup>MeAN</sup>-2,6-F<sub>2</sub>PhO (axial)**

|    |         |         |         |   |         |         |         |
|----|---------|---------|---------|---|---------|---------|---------|
| Cu | 0.1414  | 1.5823  | -0.0012 | C | 2.8310  | -0.6530 | 2.5590  |
| Cu | -1.9607 | -0.3691 | -0.1008 | C | 0.6806  | -2.2029 | 3.3295  |
| O  | -0.2307 | -0.0846 | -0.5730 | H | 2.1394  | -3.7218 | 3.8317  |
| O  | -1.6497 | 1.3710  | 0.2622  | C | 1.5488  | -0.0479 | 2.4032  |
| N  | 5.5696  | -1.8582 | -1.8493 | F | 3.9401  | 0.1027  | 2.1122  |
| N  | 1.9422  | 1.6000  | -0.9805 | C | 0.5106  | -0.9209 | 2.8304  |
| N  | 0.0556  | 3.4619  | 0.6334  | H | -0.1876 | -2.7771 | 3.6337  |
| C  | 5.2968  | -2.3108 | -3.2242 | O | 1.3566  | 1.1408  | 1.9175  |
| H  | 6.2366  | -2.6049 | -3.7025 | F | -0.8117 | -0.4313 | 2.6917  |
| H  | 4.8589  | -1.5014 | -3.8143 | H | -1.8802 | -4.1975 | 0.3975  |
| H  | 4.6065  | -3.1763 | -3.2554 | C | -2.0313 | -3.1427 | 0.6616  |
| C  | 6.2484  | -2.9254 | -1.0935 | N | -1.8651 | -2.3272 | -0.6018 |
| H  | 5.6318  | -3.8399 | -0.9967 | C | -3.3645 | -2.9809 | 1.3914  |
| H  | 6.4918  | -2.5678 | -0.0876 | H | -1.2130 | -2.8454 | 1.3243  |
| H  | 7.1815  | -3.1956 | -1.5988 | C | -0.4835 | -2.6332 | -1.1056 |
| C  | 4.3369  | -1.4452 | -1.1515 | C | -2.8673 | -2.8021 | -1.6329 |
| H  | 3.5660  | -2.2432 | -1.1952 | C | -3.5551 | -1.6107 | 2.0363  |
| H  | 4.5863  | -1.3022 | -0.0927 | H | -3.3657 | -3.7162 | 2.2052  |
| C  | 3.7493  | -0.1234 | -1.6780 | H | -4.2124 | -3.2510 | 0.7550  |
| H  | 4.5148  | 0.6525  | -1.5696 | H | -0.4188 | -3.6971 | -1.3617 |
| H  | 3.5087  | -0.2000 | -2.7436 | H | 0.2380  | -2.3863 | -0.3295 |
| C  | 2.4857  | 0.2014  | -0.8650 | H | -0.2561 | -2.0241 | -1.9753 |
| H  | 1.6714  | -0.4723 | -1.1430 | H | -2.6864 | -3.8789 | -1.7553 |
| H  | 2.6822  | 0.0613  | 0.1919  | H | -3.8637 | -2.6960 | -1.2079 |
| C  | 1.6369  | 1.9158  | -2.4059 | C | -2.8430 | -2.1310 | -3.0154 |
| H  | 1.0903  | 2.8560  | -2.4811 | N | -3.6540 | -0.4585 | 1.0697  |
| H  | 2.5562  | 1.9992  | -2.9947 | H | -4.4679 | -1.6112 | 2.6471  |
| H  | 1.0191  | 1.1147  | -2.8092 | H | -2.7102 | -1.3973 | 2.6901  |
| C  | 2.9359  | 2.5610  | -0.3997 | H | -1.8210 | -2.0377 | -3.3933 |
| H  | 3.2302  | 2.1396  | 0.5638  | H | -3.3427 | -2.8291 | -3.6987 |
| H  | 3.8120  | 2.5885  | -1.0581 | C | -3.5915 | -0.7939 | -3.1159 |
| C  | 2.4096  | 3.9817  | -0.2011 | C | -4.9324 | -0.5460 | 0.3057  |
| H  | 2.0297  | 4.4082  | -1.1360 | C | -3.7039 | 0.7981  | 1.8873  |
| H  | 3.2657  | 4.6063  | 0.0811  | N | -2.9565 | 0.2988  | -2.3439 |
| C  | 1.3876  | 4.0847  | 0.9280  | H | -3.6874 | -0.5127 | -4.1802 |
| H  | 1.2086  | 5.1368  | 1.1880  | H | -4.6085 | -0.9279 | -2.7294 |
| H  | 1.7730  | 3.5655  | 1.8078  | H | -4.9236 | -1.3897 | -0.3775 |
| C  | -0.7079 | 4.2392  | -0.3883 | H | -5.0614 | 0.3683  | -0.2647 |
| H  | -0.1516 | 4.2839  | -1.3247 | H | -5.7751 | -0.6574 | 0.9983  |
| H  | -0.8884 | 5.2599  | -0.0320 | H | -2.7882 | 0.8814  | 2.4676  |
| H  | -1.6583 | 3.7330  | -0.5618 | H | -3.7685 | 1.6545  | 1.2183  |
| C  | -0.7261 | 3.4342  | 1.9130  | H | -4.5785 | 0.7679  | 2.5485  |
| H  | -0.8074 | 4.4512  | 2.3135  | C | -1.6986 | 0.7330  | -2.9896 |
| H  | -1.7128 | 3.0234  | 1.7110  | C | -3.8429 | 1.4838  | -2.2754 |
| H  | -0.2023 | 2.7807  | 2.6097  | H | -1.8757 | 1.1146  | -4.0084 |
| H  | 4.0850  | -2.2951 | 3.0988  | H | -0.9816 | -0.0851 | -3.0254 |
| C  | 3.0654  | -1.9313 | 3.0407  | H | -1.2597 | 1.5155  | -2.3732 |
| C  | 1.9792  | -2.7233 | 3.4438  | H | -4.8537 | 1.1912  | -1.9864 |
|    |         |         |         | H | -3.9108 | 2.0019  | -3.2461 |
|    |         |         |         | H | -3.4407 | 2.1711  | -1.5260 |

**O<sup>MeAN</sup>-2,6-F<sub>2</sub>PhO<sup>-</sup> (equatorial)**

|    |         |         |         |   |         |         |         |
|----|---------|---------|---------|---|---------|---------|---------|
| Cu | 0.6141  | -0.1903 | 0.2319  | C | -3.6526 | 0.5510  | -3.1245 |
| Cu | -2.1301 | -0.7921 | -0.1100 | H | -4.6372 | 0.5913  | -2.6539 |
| O  | -0.4825 | -1.4856 | -0.4231 | H | -3.5463 | -0.4240 | -3.6077 |
| O  | -1.0420 | 0.4684  | 0.5843  | H | -3.6143 | 1.3265  | -3.9087 |
| N  | -2.5840 | 0.7347  | -2.1194 | C | -1.2652 | 0.6393  | -2.7851 |
| N  | -3.7380 | 0.0217  | 0.8164  | H | -0.4907 | 0.7661  | -2.0307 |
| N  | -2.9584 | -2.4951 | -0.7702 | H | -1.1467 | -0.3467 | -3.2390 |
| N  | 1.1784  | -1.2789 | 2.2999  | H | -1.1382 | 1.4097  | -3.5637 |
| N  | 2.2439  | -0.9325 | -0.6851 | C | -2.6785 | 2.0813  | -1.4917 |
| N  | 7.2490  | -0.1648 | -1.0905 | H | -2.7364 | 2.8537  | -2.2794 |
| C  | 2.1591  | -0.5625 | 3.1426  | H | -1.7508 | 2.2333  | -0.9394 |
| H  | 1.8706  | 0.4894  | 3.1831  | C | -3.8419 | 2.2565  | -0.5126 |
| H  | 3.1587  | -0.6255 | 2.7091  | H | -3.8888 | 3.3245  | -0.2625 |
| H  | 2.1996  | -0.9814 | 4.1627  | H | -4.8051 | 2.0269  | -0.9800 |
| C  | -0.1354 | -1.2476 | 2.9727  | C | -3.6647 | 1.5346  | 0.8270  |
| H  | -0.1239 | -1.7861 | 3.9351  | H | -4.4333 | 1.8799  | 1.5329  |
| H  | -0.8762 | -1.6992 | 2.3114  | H | -2.6819 | 1.7793  | 1.2347  |
| H  | -0.4139 | -0.2052 | 3.1341  | C | -3.5426 | -0.4156 | 2.2380  |
| C  | 1.5799  | -2.6802 | 2.0381  | H | -4.3575 | -0.0401 | 2.8675  |
| H  | 1.8602  | -3.1851 | 2.9801  | H | -2.5932 | -0.0153 | 2.5872  |
| H  | 0.6980  | -3.1946 | 1.6401  | H | -3.5186 | -1.5024 | 2.3086  |
| C  | 2.7167  | -2.8163 | 1.0159  | C | -5.0883 | -0.4103 | 0.3294  |
| H  | 3.6153  | -2.2900 | 1.3548  | H | -5.8379 | -0.0173 | 1.0296  |
| H  | 2.9946  | -3.8774 | 0.9756  | H | -5.2565 | 0.0666  | -0.6359 |
| C  | 2.3423  | -2.4104 | -0.4167 | C | -5.2630 | -1.9190 | 0.1612  |
| H  | 3.0724  | -2.8287 | -1.1210 | H | -5.0737 | -2.4595 | 1.0936  |
| H  | 1.3601  | -2.8214 | -0.6693 | H | -6.3188 | -2.0967 | -0.0737 |
| C  | 1.9342  | -0.7348 | -2.1367 | C | -4.4422 | -2.4835 | -0.9961 |
| H  | 1.8437  | 0.3353  | -2.3317 | H | -4.7529 | -3.5128 | -1.2182 |
| H  | 2.7232  | -1.1557 | -2.7683 | H | -4.6206 | -1.8819 | -1.8915 |
| H  | 0.9880  | -1.2285 | -2.3567 | C | -2.5800 | -3.5204 | 0.2550  |
| C  | 3.4835  | -0.1697 | -0.3157 | H | -2.9099 | -4.5145 | -0.0665 |
| H  | 3.3077  | 0.8577  | -0.6380 | H | -3.0423 | -3.2877 | 1.2138  |
| H  | 3.5320  | -0.1372 | 0.7721  | H | -1.4961 | -3.5015 | 0.3661  |
| C  | 4.7997  | -0.7079 | -0.8966 | C | -2.2944 | -2.8599 | -2.0627 |
| H  | 4.7699  | -0.7292 | -1.9916 | H | -2.5646 | -2.1263 | -2.8202 |
| H  | 4.9742  | -1.7326 | -0.5537 | H | -2.6268 | -3.8542 | -2.3816 |
| C  | 5.9643  | 0.1964  | -0.4590 | H | -1.2161 | -2.8423 | -1.9144 |
| H  | 6.0458  | 0.1865  | 0.6478  | O | 1.4680  | 1.3843  | 0.7790  |
| H  | 5.7361  | 1.2295  | -0.7511 | C | 0.7414  | 2.4887  | 0.6596  |
| C  | 7.7509  | -1.4644 | -0.6105 | C | 0.7226  | 3.2507  | -0.5270 |
| H  | 7.0557  | -2.2655 | -0.8748 | C | -0.0685 | 2.9946  | 1.6962  |
| H  | 7.9012  | -1.4813 | 0.4865  | C | -0.0128 | 4.4134  | -0.6933 |
| H  | 8.7103  | -1.6809 | -1.0911 | F | 1.4666  | 2.7479  | -1.6054 |
| C  | 8.2513  | 0.8858  | -0.8391 | C | -0.8309 | 4.1493  | 1.5823  |
| H  | 8.4691  | 1.0209  | 0.2379  | F | -0.1029 | 2.2768  | 2.8946  |
| H  | 9.1867  | 0.6278  | -1.3463 | C | -0.7997 | 4.8665  | 0.3774  |
| H  | 7.8942  | 1.8404  | -1.2394 | H | 0.0192  | 4.9404  | -1.6385 |
|    |         |         |         | H | -1.4353 | 4.4748  | 2.4199  |
|    |         |         |         | H | -1.3879 | 5.7697  | 0.2707  |

**S<sub>P</sub><sup>MeAN</sup>-2,6-F<sub>2</sub>PhO' (axial)**

|    |         |         |         |   |         |         |         |
|----|---------|---------|---------|---|---------|---------|---------|
| Cu | 0.8072  | 1.6606  | -0.7711 | C | -1.2711 | 0.7218  | 4.2711  |
| Cu | -1.9823 | -0.3854 | -0.6580 | H | -1.0809 | -0.8975 | 5.6950  |
| O  | -0.1388 | 0.0703  | -1.2209 | C | 0.4609  | 0.8740  | 2.4704  |
| O  | -1.0688 | 1.2167  | -1.3164 | F | 2.1742  | -0.8328 | 2.5060  |
| N  | 5.0996  | -3.2509 | 0.1838  | C | -0.7098 | 1.3154  | 3.1505  |
| N  | 2.7314  | 1.0881  | -1.0811 | H | -2.1731 | 1.1452  | 4.6975  |
| N  | 0.9513  | 3.6355  | -0.7200 | O | 0.9671  | 1.4646  | 1.4306  |
| C  | 5.7230  | -3.6139 | -1.1001 | F | -1.3830 | 2.4276  | 2.5887  |
| H  | 6.6391  | -4.1827 | -0.9108 | H | -2.0082 | -2.8772 | 2.3097  |
| H  | 5.9950  | -2.7157 | -1.6606 | C | -2.1202 | -1.9188 | 1.7825  |
| H  | 5.0571  | -4.2313 | -1.7344 | N | -1.8211 | -2.1451 | 0.3221  |
| C  | 4.8392  | -4.4628 | 0.9793  | C | -3.4925 | -1.3120 | 2.0969  |
| H  | 4.1324  | -5.1568 | 0.4839  | H | -1.3450 | -1.2464 | 2.1553  |
| H  | 4.4200  | -4.1830 | 1.9515  | C | -0.3806 | -2.5431 | 0.2213  |
| H  | 5.7788  | -4.9985 | 1.1500  | C | -2.6991 | -3.2453 | -0.2079 |
| C  | 3.8505  | -2.4884 | -0.0068 | C | -3.6736 | 0.1379  | 1.6379  |
| H  | 3.1432  | -3.0399 | -0.6622 | H | -3.5790 | -1.3045 | 3.1900  |
| H  | 3.3677  | -2.3946 | 0.9734  | H | -4.3095 | -1.9482 | 1.7424  |
| C  | 4.0760  | -1.0727 | -0.5680 | H | -0.2087 | -3.4955 | 0.7384  |
| H  | 4.8047  | -0.5631 | 0.0721  | H | 0.2363  | -1.7659 | 0.6726  |
| H  | 4.4989  | -1.1220 | -1.5776 | H | -0.0924 | -2.6355 | -0.8231 |
| C  | 2.7328  | -0.3290 | -0.5768 | H | -2.4791 | -4.1521 | 0.3750  |
| H  | 2.0138  | -0.8731 | -1.1966 | H | -3.7334 | -2.9698 | 0.0060  |
| H  | 2.3325  | -0.2839 | 0.4347  | C | -2.5780 | -3.5693 | -1.7049 |
| C  | 3.0498  | 1.1312  | -2.5338 | N | -3.7053 | 0.3375  | 0.1484  |
| H  | 2.9455  | 2.1472  | -2.9130 | H | -4.6040 | 0.5465  | 2.0585  |
| H  | 4.0715  | 0.7881  | -2.7336 | H | -2.8500 | 0.7445  | 2.0109  |
| H  | 2.3403  | 0.4903  | -3.0626 | H | -1.5496 | -3.8378 | -1.9649 |
| C  | 3.6556  | 1.9417  | -0.2690 | H | -3.1662 | -4.4820 | -1.8627 |
| H  | 3.4413  | 1.7018  | 0.7759  | C | -3.1294 | -2.5073 | -2.6703 |
| H  | 4.6933  | 1.6594  | -0.4900 | C | -4.9615 | -0.2382 | -0.4097 |
| C  | 3.4893  | 3.4544  | -0.4849 | C | -3.6887 | 1.8102  | -0.1248 |
| H  | 3.6531  | 3.7247  | -1.5338 | N | -2.3009 | -1.2728 | -2.7488 |
| H  | 4.2994  | 3.9421  | 0.0714  | H | -3.2351 | -2.9495 | -3.6756 |
| C  | 2.1748  | 4.0446  | 0.0445  | H | -4.1327 | -2.2129 | -2.3438 |
| H  | 2.2296  | 5.1428  | 0.0468  | H | -4.9736 | -1.3193 | -0.2856 |
| H  | 2.0140  | 3.6982  | 1.0686  | H | -5.0302 | -0.0055 | -1.4709 |
| C  | 0.9270  | 4.2134  | -2.0932 | H | -5.8341 | 0.1885  | 0.1008  |
| H  | 1.8022  | 3.8951  | -2.6577 | H | -2.7995 | 2.2419  | 0.3343  |
| H  | 0.9090  | 5.3099  | -2.0510 | H | -3.6431 | 1.9724  | -1.2027 |
| H  | 0.0324  | 3.8542  | -2.6064 | H | -4.5878 | 2.2863  | 0.2855  |
| C  | -0.2663 | 4.0881  | 0.0197  | C | -1.0154 | -1.5545 | -3.4395 |
| H  | -0.2585 | 5.1791  | 0.1390  | C | -3.0032 | -0.2221 | -3.5277 |
| H  | -1.1498 | 3.7910  | -0.5483 | H | -1.1951 | -1.9499 | -4.4518 |
| H  | -0.2903 | 3.5979  | 0.9913  | H | -0.4249 | -2.2774 | -2.8772 |
| H  | 1.0033  | -1.8003 | 4.5978  | H | -0.4365 | -0.6338 | -3.4936 |
| C  | 0.4991  | -0.9208 | 4.2145  | H | -3.9898 | -0.0339 | -3.1024 |
| C  | -0.6611 | -0.4155 | 4.8210  | H | -3.1337 | -0.5127 | -4.5815 |
| C  | 1.0144  | -0.2835 | 3.0962  | H | -2.4167 | 0.6978  | -3.4706 |

<sup>S</sup>P<sup>MeAN</sup>-2,6-F<sub>2</sub>PhO<sup>-</sup> (equatorial)

|    |         |         |         |   |         |         |         |
|----|---------|---------|---------|---|---------|---------|---------|
| Cu | 1.0488  | -0.2402 | 0.5185  | H | -3.9190 | -1.8304 | 2.0474  |
| Cu | -2.5113 | -0.7575 | -0.3081 | C | -5.3998 | -0.4078 | 0.2727  |
| O  | -0.6804 | -1.2976 | -0.2793 | H | -6.1553 | -0.1307 | 1.0227  |
| O  | -0.8686 | -0.0832 | 0.5663  | H | -5.5572 | 0.2283  | -0.6008 |
| N  | -2.5180 | 0.9286  | -1.8527 | C | -5.6042 | -1.8714 | -0.1467 |
| N  | -4.0448 | -0.0820 | 0.8246  | H | -5.4633 | -2.5504 | 0.6999  |
| N  | -3.3073 | -2.4290 | -1.1085 | H | -6.6599 | -1.9707 | -0.4267 |
| N  | 1.1784  | -1.5511 | 2.1726  | C | -4.7794 | -2.3234 | -1.3601 |
| N  | 2.6180  | -0.9017 | -0.5585 | H | -5.1458 | -3.2963 | -1.7185 |
| N  | 7.5953  | -0.0229 | -1.1277 | H | -4.9087 | -1.6009 | -2.1724 |
| C  | 2.1459  | -0.9474 | 3.1304  | C | -2.9830 | -3.5571 | -0.1867 |
| H  | 1.8111  | 0.0648  | 3.3656  | H | -3.2895 | -4.5154 | -0.6251 |
| H  | 3.1387  | -0.8886 | 2.6857  | H | -3.4909 | -3.4279 | 0.7679  |
| H  | 2.2084  | -1.5386 | 4.0551  | H | -1.9064 | -3.5544 | -0.0088 |
| C  | -0.1516 | -1.6314 | 2.8392  | C | -2.5882 | -2.6601 | -2.3955 |
| H  | -0.0980 | -2.2731 | 3.7304  | H | -2.7928 | -1.8375 | -3.0797 |
| H  | -0.8735 | -2.0299 | 2.1278  | H | -2.9114 | -3.6009 | -2.8587 |
| H  | -0.4615 | -0.6250 | 3.1187  | H | -1.5160 | -2.6955 | -2.1975 |
| C  | 1.5890  | -2.9285 | 1.7660  | O | 1.5388  | 1.6132  | 0.2156  |
| H  | 1.7374  | -3.5394 | 2.6705  | C | 0.7017  | 2.6017  | 0.4621  |
| H  | 0.7409  | -3.3457 | 1.2128  | C | 0.4638  | 3.6364  | -0.4717 |
| C  | 2.8387  | -3.0038 | 0.8786  | C | -0.0364 | 2.7399  | 1.6603  |
| H  | 3.7141  | -2.5812 | 1.3830  | C | -0.3988 | 4.7011  | -0.2555 |
| H  | 3.0651  | -4.0682 | 0.7409  | F | 1.1206  | 3.5344  | -1.7053 |
| C  | 2.6577  | -2.3990 | -0.5196 | C | -0.9247 | 3.7724  | 1.9221  |
| H  | 3.4498  | -2.7551 | -1.1901 | F | 0.1387  | 1.7363  | 2.6339  |
| H  | 1.7016  | -2.7369 | -0.9333 | C | -1.1063 | 4.7718  | 0.9539  |
| C  | 2.2494  | -0.4580 | -1.9397 | H | -0.5258 | 5.4472  | -1.0306 |
| H  | 2.1933  | 0.6313  | -1.9501 | H | -1.4560 | 3.7922  | 2.8660  |
| H  | 2.9760  | -0.8074 | -2.6810 | H | -1.7904 | 5.5908  | 1.1387  |
| H  | 1.2663  | -0.8665 | -2.1835 |   |         |         |         |
| C  | 3.8901  | -0.2440 | -0.1131 |   |         |         |         |
| H  | 3.6981  | 0.8300  | -0.1726 |   |         |         |         |
| H  | 4.0301  | -0.4801 | 0.9442  |   |         |         |         |
| C  | 5.1614  | -0.6173 | -0.8904 |   |         |         |         |
| H  | 5.0543  | -0.3825 | -1.9550 |   |         |         |         |
| H  | 5.3493  | -1.6932 | -0.8083 |   |         |         |         |
| C  | 6.3620  | 0.1701  | -0.3392 |   |         |         |         |
| H  | 6.5234  | -0.0941 | 0.7267  |   |         |         |         |
| H  | 6.1213  | 1.2407  | -0.3674 |   |         |         |         |
| C  | 8.1231  | -1.3921 | -0.9954 |   |         |         |         |
| H  | 7.4042  | -2.1192 | -1.3819 |   |         |         |         |
| H  | 8.3562  | -1.6567 | 0.0544  |   |         |         |         |
| H  | 9.0419  | -1.4836 | -1.5836 |   |         |         |         |
| C  | 8.6196  | 0.9535  | -0.7174 |   |         |         |         |
| H  | 8.9171  | 0.8424  | 0.3432  |   |         |         |         |
| H  | 9.5136  | 0.8279  | -1.3370 |   |         |         |         |
| H  | 8.2399  | 1.9703  | -0.8626 |   |         |         |         |
| C  | -3.5147 | 0.9317  | -2.9495 |   |         |         |         |
| H  | -4.5290 | 0.8878  | -2.5484 |   |         |         |         |
| H  | -3.3628 | 0.0604  | -3.5903 |   |         |         |         |
| H  | -3.4234 | 1.8361  | -3.5720 |   |         |         |         |
| C  | -1.1491 | 0.8949  | -2.4338 |   |         |         |         |
| H  | -0.4223 | 0.8744  | -1.6232 |   |         |         |         |
| H  | -1.0317 | -0.0120 | -3.0313 |   |         |         |         |
| H  | -0.9594 | 1.7743  | -3.0684 |   |         |         |         |
| C  | -2.6383 | 2.1733  | -1.0398 |   |         |         |         |
| H  | -2.5578 | 3.0489  | -1.7045 |   |         |         |         |
| H  | -1.7765 | 2.1874  | -0.3730 |   |         |         |         |
| C  | -3.9072 | 2.2896  | -0.1886 |   |         |         |         |
| H  | -3.9439 | 3.3230  | 0.1785  |   |         |         |         |
| H  | -4.8143 | 2.1592  | -0.7875 |   |         |         |         |
| C  | -3.9171 | 1.4004  | 1.0599  |   |         |         |         |
| H  | -4.7342 | 1.7071  | 1.7301  |   |         |         |         |
| H  | -2.9729 | 1.5431  | 1.5949  |   |         |         |         |
| C  | -3.8453 | -0.7489 | 2.1486  |   |         |         |         |
| H  | -4.5964 | -0.4090 | 2.8733  |   |         |         |         |
| H  | -2.8471 | -0.5038 | 2.5140  |   |         |         |         |



**O<sup>MeAN</sup>-2,4-F<sub>2</sub>PhO (axial)**

|    |         |         |         |   |         |         |         |
|----|---------|---------|---------|---|---------|---------|---------|
| Cu | -0.2688 | 1.5821  | -0.5742 | H | -0.3914 | -1.9378 | 1.1475  |
| Cu | 1.8553  | -0.0848 | 0.4230  | H | 0.0047  | -1.0794 | 2.6279  |
| O  | 0.0865  | 0.2609  | 0.5952  | H | 2.3872  | -2.8677 | 3.1835  |
| O  | 1.5382  | 1.3487  | -0.6324 | H | 3.6364  | -1.9642 | 2.3467  |
| N  | -5.6343 | -1.3483 | 2.0613  | C | 2.5286  | -0.7956 | 3.7784  |
| N  | -2.1413 | 1.8613  | 0.1932  | N | 3.6848  | -0.4849 | -0.4482 |
| N  | -0.1666 | 3.1128  | -1.8363 | H | 4.4759  | -2.0417 | -1.6506 |
| C  | -5.8133 | -0.8114 | 3.4210  | H | 2.7317  | -1.7739 | -1.7941 |
| H  | -6.8300 | -1.0266 | 3.7651  | H | 1.4923  | -0.6258 | 4.0842  |
| H  | -5.6805 | 0.2737  | 3.4245  | H | 3.0316  | -1.1968 | 4.6672  |
| H  | -5.1017 | -1.2514 | 4.1470  | C | 3.2225  | 0.5321  | 3.4348  |
| C  | -5.9286 | -2.7917 | 2.0456  | C | 4.9028  | -0.4435 | 0.4153  |
| H  | -5.2474 | -3.3746 | 2.6955  | C | 3.9000  | 0.5110  | -1.5482 |
| H  | -5.8393 | -3.1753 | 1.0239  | N | 2.5736  | 1.2784  | 2.3291  |
| H  | -6.9545 | -2.9607 | 2.3891  | H | 3.2686  | 1.1576  | 4.3440  |
| C  | -4.2737 | -1.1017 | 1.5466  | H | 4.2566  | 0.3278  | 3.1378  |
| H  | -3.5053 | -1.5023 | 2.2412  | H | 4.7989  | -1.0906 | 1.2789  |
| H  | -4.1703 | -1.6539 | 0.6044  | H | 5.0646  | 0.5748  | 0.7557  |
| C  | -3.9865 | 0.3845  | 1.2639  | H | 5.7762  | -0.7666 | -0.1637 |
| H  | -4.7848 | 0.7687  | 0.6194  | H | 3.0717  | 0.4593  | -2.2505 |
| H  | -4.0029 | 0.9621  | 2.1945  | H | 3.9232  | 1.5130  | -1.1223 |
| C  | -2.6136 | 0.4861  | 0.5830  | H | 4.8456  | 0.2941  | -2.0590 |
| H  | -1.8406 | 0.0744  | 1.2362  | C | 1.2759  | 1.8406  | 2.7670  |
| H  | -2.6092 | -0.0907 | -0.3374 | C | 3.4144  | 2.4173  | 1.8902  |
| C  | -1.9932 | 2.7232  | 1.4018  | H | 1.4012  | 2.5326  | 3.6153  |
| H  | -1.4698 | 3.6462  | 1.1521  | H | 0.5830  | 1.0475  | 3.0425  |
| H  | -2.9702 | 2.9806  | 1.8233  | H | 0.8374  | 2.3691  | 1.9224  |
| H  | -1.4110 | 2.1783  | 2.1436  | H | 4.4363  | 2.0898  | 1.6948  |
| C  | -3.1008 | 2.4530  | -0.7926 | H | 3.4567  | 3.2129  | 2.6514  |
| H  | -3.2615 | 1.6824  | -1.5496 | H | 2.9897  | 2.8187  | 0.9664  |
| H  | -4.0470 | 2.6493  | -0.2746 |   |         |         |         |
| C  | -2.6137 | 3.7370  | -1.4637 |   |         |         |         |
| H  | -2.3576 | 4.5069  | -0.7277 |   |         |         |         |
| H  | -3.4571 | 4.1436  | -2.0344 |   |         |         |         |
| C  | -1.4779 | 3.4962  | -2.4548 |   |         |         |         |
| H  | -1.3054 | 4.3934  | -3.0645 |   |         |         |         |
| H  | -1.7485 | 2.6690  | -3.1144 |   |         |         |         |
| C  | 0.4609  | 4.2515  | -1.1013 |   |         |         |         |
| H  | -0.1918 | 4.5909  | -0.2972 |   |         |         |         |
| H  | 0.6496  | 5.0877  | -1.7841 |   |         |         |         |
| H  | 1.4017  | 3.9032  | -0.6731 |   |         |         |         |
| C  | 0.7472  | 2.6844  | -2.9444 |   |         |         |         |
| H  | 0.8431  | 3.4961  | -3.6748 |   |         |         |         |
| H  | 1.7186  | 2.4369  | -2.5213 |   |         |         |         |
| H  | 0.3164  | 1.7958  | -3.4039 |   |         |         |         |
| H  | -2.3954 | -4.0309 | -2.1060 |   |         |         |         |
| C  | -1.6396 | -3.2849 | -2.3153 |   |         |         |         |
| C  | -0.3611 | -3.6400 | -2.7394 |   |         |         |         |
| C  | -1.9197 | -1.9336 | -2.1882 |   |         |         |         |
| C  | 0.6065  | -2.6825 | -3.0238 |   |         |         |         |
| F  | -0.0518 | -5.0038 | -2.8891 |   |         |         |         |
| C  | -0.9896 | -0.8750 | -2.4225 |   |         |         |         |
| F  | -3.2260 | -1.5849 | -1.7779 |   |         |         |         |
| C  | 0.2940  | -1.3284 | -2.8573 |   |         |         |         |
| H  | 1.5825  | -2.9974 | -3.3759 |   |         |         |         |
| O  | -1.2899 | 0.3849  | -2.2640 |   |         |         |         |
| H  | 1.0359  | -0.5651 | -3.0629 |   |         |         |         |
| H  | 1.7545  | -3.8675 | 1.1300  |   |         |         |         |
| C  | 1.9226  | -2.9371 | 0.5718  |   |         |         |         |
| N  | 1.6928  | -1.7813 | 1.5208  |   |         |         |         |
| C  | 3.2908  | -2.9904 | -0.1101 |   |         |         |         |
| H  | 1.1435  | -2.8611 | -0.1935 |   |         |         |         |
| C  | 0.2780  | -1.9258 | 2.0047  |   |         |         |         |
| C  | 2.6143  | -1.9010 | 2.7132  |   |         |         |         |
| C  | 3.5565  | -1.8427 | -1.0839 |   |         |         |         |
| H  | 3.3024  | -3.9134 | -0.7022 |   |         |         |         |
| H  | 4.1032  | -3.0994 | 0.6146  |   |         |         |         |
| H  | 0.1841  | -2.8577 | 2.5742  |   |         |         |         |

**O<sup>MeAN</sup>-2,4-F<sub>2</sub>PhO<sup>-</sup> (equatorial)**

|    |         |         |         |   |         |         |         |
|----|---------|---------|---------|---|---------|---------|---------|
| Cu | 0.7178  | -0.1390 | 0.1105  | H | -3.2609 | -1.2760 | 2.5138  |
| Cu | -1.9832 | -0.9760 | -0.0477 | C | -4.9475 | -0.7008 | 0.4153  |
| O  | -0.2971 | -1.5981 | -0.3049 | H | -5.7041 | -0.2286 | 1.0563  |
| O  | -0.9730 | 0.4534  | 0.3905  | H | -5.1737 | -0.4307 | -0.6162 |
| N  | -2.5906 | 0.0875  | -2.3097 | C | -5.0205 | -2.2216 | 0.5453  |
| N  | -3.6187 | -0.0980 | 0.7581  | H | -4.7655 | -2.5577 | 1.5549  |
| N  | -2.7094 | -2.8214 | -0.3531 | H | -6.0675 | -2.5084 | 0.3940  |
| N  | 1.3537  | -0.9638 | 2.3196  | C | -4.1960 | -2.9452 | -0.5170 |
| N  | 2.3963  | -0.9095 | -0.6916 | H | -4.4417 | -4.0152 | -0.5286 |
| N  | 7.3665  | 0.0490  | -1.1366 | H | -4.4407 | -2.5376 | -1.5016 |
| C  | 2.2996  | -0.1125 | 3.0722  | C | -2.2340 | -3.6082 | 0.8297  |
| H  | 1.9650  | 0.9232  | 2.9979  | H | -2.5142 | -4.6619 | 0.7208  |
| H  | 3.3019  | -0.1819 | 2.6456  | H | -2.6738 | -3.2192 | 1.7478  |
| H  | 2.3589  | -0.4103 | 4.1334  | H | -1.1502 | -3.5121 | 0.8831  |
| C  | 0.0429  | -0.9381 | 2.9994  | C | -2.0576 | -3.3812 | -1.5797 |
| H  | 0.0852  | -1.3981 | 4.0011  | H | -2.4016 | -2.8236 | -2.4487 |
| H  | -0.6788 | -1.4756 | 2.3830  | H | -2.3261 | -4.4377 | -1.6930 |
| H  | -0.2842 | 0.0973  | 3.0839  | H | -0.9796 | -3.2640 | -1.4820 |
| C  | 1.8270  | -2.3635 | 2.2156  | O | 1.4580  | 1.5651  | 0.3517  |
| H  | 2.1338  | -2.7416 | 3.2078  | C | 0.5972  | 2.5838  | 0.2817  |
| H  | 0.9722  | -2.9640 | 1.8865  | C | 0.3889  | 3.2994  | -0.9197 |
| C  | 2.9661  | -2.5621 | 1.2083  | C | -0.1537 | 3.0074  | 1.4004  |
| H  | 3.8403  | -1.9602 | 1.4781  | C | -0.5184 | 4.3580  | -0.9984 |
| H  | 3.2934  | -3.6069 | 1.2866  | H | 0.9467  | 2.9827  | -1.7935 |
| C  | 2.5675  | -2.3410 | -0.2570 | C | -1.0703 | 4.0479  | 1.3610  |
| H  | 3.3152  | -2.8004 | -0.9159 | F | 0.0266  | 2.3444  | 2.6165  |
| H  | 1.6056  | -2.8250 | -0.4512 | C | -1.2366 | 4.7028  | 0.1439  |
| C  | 2.0919  | -0.8997 | -2.1561 | H | -0.6803 | 4.8978  | -1.9227 |
| H  | 1.9273  | 0.1314  | -2.4766 | H | -1.6339 | 4.3314  | 2.2393  |
| H  | 2.9149  | -1.3301 | -2.7356 | F | -2.1660 | 5.7440  | 0.0726  |
| H  | 1.1857  | -1.4819 | -2.3226 |   |         |         |         |
| C  | 3.5937  | -0.0519 | -0.4022 |   |         |         |         |
| H  | 3.3764  | 0.9250  | -0.8359 |   |         |         |         |
| H  | 3.6261  | 0.1020  | 0.6758  |   |         |         |         |
| C  | 4.9418  | -0.5849 | -0.9111 |   |         |         |         |
| H  | 4.9287  | -0.7212 | -1.9982 |   |         |         |         |
| H  | 5.1583  | -1.5594 | -0.4624 |   |         |         |         |
| C  | 6.0575  | 0.4136  | -0.5593 |   |         |         |         |
| H  | 6.1229  | 0.5230  | 0.5433  |   |         |         |         |
| H  | 5.7872  | 1.3989  | -0.9601 |   |         |         |         |
| C  | 7.9191  | -1.1693 | -0.5188 |   |         |         |         |
| H  | 7.2652  | -2.0250 | -0.7061 |   |         |         |         |
| H  | 8.0529  | -1.0660 | 0.5756  |   |         |         |         |
| H  | 8.8947  | -1.3893 | -0.9638 |   |         |         |         |
| C  | 8.3163  | 1.1655  | -0.9858 |   |         |         |         |
| H  | 8.5116  | 1.4217  | 0.0733  |   |         |         |         |
| H  | 9.2700  | 0.9002  | -1.4537 |   |         |         |         |
| H  | 7.9225  | 2.0558  | -1.4872 |   |         |         |         |
| C  | -3.6721 | -0.3378 | -3.2239 |   |         |         |         |
| H  | -4.6459 | -0.2534 | -2.7369 |   |         |         |         |
| H  | -3.5263 | -1.3820 | -3.5133 |   |         |         |         |
| H  | -3.6938 | 0.2718  | -4.1437 |   |         |         |         |
| C  | -1.2849 | -0.0684 | -2.9890 |   |         |         |         |
| H  | -0.5016 | 0.2103  | -2.2861 |   |         |         |         |
| H  | -1.1320 | -1.1115 | -3.2740 |   |         |         |         |
| H  | -1.2097 | 0.5622  | -3.8906 |   |         |         |         |
| C  | -2.7437 | 1.5229  | -1.9457 |   |         |         |         |
| H  | -2.8652 | 2.1261  | -2.8636 |   |         |         |         |
| H  | -1.8116 | 1.8255  | -1.4655 |   |         |         |         |
| C  | -3.8943 | 1.8219  | -0.9807 |   |         |         |         |
| H  | -4.0027 | 2.9141  | -0.9410 |   |         |         |         |
| H  | -4.8509 | 1.4514  | -1.3639 |   |         |         |         |
| C  | -3.6483 | 1.3886  | 0.4680  |   |         |         |         |
| H  | -4.4272 | 1.8171  | 1.1146  |   |         |         |         |
| H  | -2.6788 | 1.7709  | 0.7911  |   |         |         |         |
| C  | -3.3591 | -0.2286 | 2.2302  |   |         |         |         |
| H  | -4.1814 | 0.2162  | 2.8023  |   |         |         |         |
| H  | -2.4292 | 0.2898  | 2.4554  |   |         |         |         |

**S<sub>P</sub><sup>MeAN</sup>-2,4-F<sub>2</sub>PhO' (axial)**

|    |         |         |         |   |         |         |         |
|----|---------|---------|---------|---|---------|---------|---------|
| Cu | 0.9312  | 1.8239  | -0.0014 | H | 0.1057  | -1.8929 | -0.1680 |
| Cu | -1.9594 | 0.0943  | -0.8642 | H | -0.1964 | -2.0117 | -1.8993 |
| O  | -0.0556 | 0.6053  | -1.0904 | H | -2.7319 | -3.7102 | -1.4942 |
| O  | -0.9273 | 1.7509  | -0.7462 | H | -3.8934 | -2.3912 | -1.3622 |
| N  | 5.0978  | -3.1884 | -0.9970 | C | -2.6881 | -2.3124 | -3.1435 |
| N  | 2.8418  | 1.3612  | -0.5196 | N | -3.6859 | 0.5528  | 0.1168  |
| N  | 1.1352  | 3.6260  | 0.8051  | H | -4.5804 | 0.0711  | 1.9809  |
| C  | 5.7854  | -3.0131 | -2.2876 | H | -2.8088 | 0.1083  | 1.9704  |
| H  | 6.6823  | -3.6405 | -2.3087 | H | -1.6659 | -2.5298 | -3.4678 |
| H  | 6.0993  | -1.9739 | -2.4155 | H | -3.3228 | -3.0274 | -3.6818 |
| H  | 5.1473  | -3.2925 | -3.1489 | C | -3.1191 | -0.9058 | -3.5905 |
| C  | 4.7851  | -4.6113 | -0.7804 | C | -4.9561 | 0.3084  | -0.6247 |
| H  | 4.1006  | -5.0212 | -1.5484 | C | -3.6003 | 2.0119  | 0.4377  |
| H  | 4.3162  | -4.7406 | 0.2007  | N | -2.2187 | 0.1838  | -3.1217 |
| H  | 5.7098  | -5.1975 | -0.8007 | H | -3.1919 | -0.8802 | -4.6910 |
| C  | 3.8663  | -2.3792 | -0.9149 | H | -4.1208 | -0.6979 | -3.1995 |
| H  | 3.1811  | -2.6092 | -1.7586 | H | -5.0156 | -0.7267 | -0.9537 |
| H  | 3.3430  | -2.6678 | 0.0050  | H | -4.9980 | 0.9561  | -1.4992 |
| C  | 4.1297  | -0.8633 | -0.8673 | H | -5.8189 | 0.5280  | 0.0169  |
| H  | 4.8634  | -0.6666 | -0.0774 | H | -2.6949 | 2.1942  | 1.0155  |
| H  | 4.5622  | -0.5201 | -1.8137 | H | -3.5359 | 2.5784  | -0.4923 |
| C  | 2.8053  | -0.1408 | -0.5811 | H | -4.4795 | 2.3336  | 1.0093  |
| H  | 2.0714  | -0.3964 | -1.3519 | C | -0.9157 | 0.1272  | -3.8339 |
| H  | 2.4030  | -0.4681 | 0.3764  | C | -2.8223 | 1.5119  | -3.3980 |
| C  | 3.1529  | 1.9394  | -1.8546 | H | -1.0600 | 0.2279  | -4.9211 |
| H  | 3.0742  | 3.0259  | -1.8232 | H | -0.4060 | -0.8145 | -3.6313 |
| H  | 4.1633  | 1.6734  | -2.1858 | H | -0.2789 | 0.9295  | -3.4634 |
| H  | 2.4219  | 1.5609  | -2.5729 | H | -3.8111 | 1.5777  | -2.9417 |
| C  | 3.7917  | 1.8238  | 0.5401  | H | -2.9286 | 1.6958  | -4.4782 |
| H  | 3.5742  | 1.2150  | 1.4223  | H | -2.1822 | 2.2792  | -2.9566 |
| H  | 4.8207  | 1.6181  | 0.2172  |   |         |         |         |
| C  | 3.6681  | 3.3098  | 0.9111  |   |         |         |         |
| H  | 3.8311  | 3.9509  | 0.0379  |   |         |         |         |
| H  | 4.4956  | 3.5336  | 1.5956  |   |         |         |         |
| C  | 2.3746  | 3.6853  | 1.6466  |   |         |         |         |
| H  | 2.4599  | 4.6981  | 2.0662  |   |         |         |         |
| H  | 2.2114  | 2.9788  | 2.4647  |   |         |         |         |
| C  | 1.1158  | 4.6804  | -0.2478 |   |         |         |         |
| H  | 1.9793  | 4.5792  | -0.9037 |   |         |         |         |
| H  | 1.1267  | 5.6802  | 0.2043  |   |         |         |         |
| H  | 0.2095  | 4.5587  | -0.8449 |   |         |         |         |
| C  | -0.0612 | 3.7927  | 1.6829  |   |         |         |         |
| H  | -0.0232 | 4.7533  | 2.2116  |   |         |         |         |
| H  | -0.9590 | 3.7522  | 1.0643  |   |         |         |         |
| H  | -0.0766 | 2.9687  | 2.3953  |   |         |         |         |
| H  | 0.3841  | -3.4925 | 3.3489  |   |         |         |         |
| C  | 0.0680  | -2.4588 | 3.3980  |   |         |         |         |
| C  | -1.0010 | -2.0573 | 4.1953  |   |         |         |         |
| C  | 0.7084  | -1.4837 | 2.6485  |   |         |         |         |
| C  | -1.4144 | -0.7305 | 4.2485  |   |         |         |         |
| F  | -1.6789 | -3.0258 | 4.9544  |   |         |         |         |
| C  | 0.3651  | -0.0980 | 2.6310  |   |         |         |         |
| F  | 1.7627  | -1.9149 | 1.8125  |   |         |         |         |
| C  | -0.7388 | 0.2239  | 3.4805  |   |         |         |         |
| H  | -2.2509 | -0.4510 | 4.8785  |   |         |         |         |
| O  | 1.0124  | 0.7907  | 1.9257  |   |         |         |         |
| H  | -1.0515 | 1.2614  | 3.5179  |   |         |         |         |
| H  | -2.2896 | -3.3792 | 0.8109  |   |         |         |         |
| C  | -2.3076 | -2.2834 | 0.7223  |   |         |         |         |
| N  | -1.9525 | -1.9160 | -0.6951 |   |         |         |         |
| C  | -3.6411 | -1.7406 | 1.2483  |   |         |         |         |
| H  | -1.5044 | -1.8899 | 1.3473  |   |         |         |         |
| C  | -0.5356 | -2.3484 | -0.9225 |   |         |         |         |
| C  | -2.8680 | -2.6297 | -1.6507 |   |         |         |         |
| C  | -3.6875 | -0.2173 | 1.4075  |   |         |         |         |
| H  | -3.7655 | -2.1632 | 2.2527  |   |         |         |         |
| H  | -4.4921 | -2.1101 | 0.6678  |   |         |         |         |
| H  | -0.4552 | -3.4411 | -0.8594 |   |         |         |         |

<sup>S</sup>P<sup>MeAN</sup>-2,4-F<sub>2</sub>PhO<sup>-</sup> (equatorial)

|    |         |         |         |   |         |         |         |
|----|---------|---------|---------|---|---------|---------|---------|
| Cu | 1.1577  | -0.1648 | 0.4756  | C | -3.5347 | 0.3281  | -3.0937 |
| Cu | -2.4025 | -0.9449 | -0.2714 | H | -4.5349 | 0.3414  | -2.6571 |
| O  | -0.5527 | -1.4133 | -0.2349 | H | -3.3945 | -0.6306 | -3.5981 |
| O  | -0.7634 | -0.1054 | 0.4452  | H | -3.4739 | 1.1266  | -3.8505 |
| N  | -2.5034 | 0.5001  | -2.0440 | C | -1.1541 | 0.3937  | -2.6599 |
| N  | -3.9395 | -0.1464 | 0.7752  | H | -0.4030 | 0.5237  | -1.8812 |
| N  | -3.1714 | -2.7318 | -0.8111 | H | -1.0319 | -0.5993 | -3.0981 |
| N  | 1.2872  | -1.3099 | 2.2348  | H | -1.0110 | 1.1538  | -3.4438 |
| N  | 2.7691  | -0.8885 | -0.5116 | C | -2.6161 | 1.8492  | -1.4184 |
| N  | 7.6979  | 0.1969  | -1.1596 | H | -2.5726 | 2.6196  | -2.2061 |
| C  | 2.2199  | -0.5869 | 3.1443  | H | -1.7316 | 1.9688  | -0.7932 |
| H  | 1.8433  | 0.4272  | 3.2891  | C | -3.8593 | 2.0747  | -0.5504 |
| H  | 3.2141  | -0.5261 | 2.7033  | H | -3.8885 | 3.1474  | -0.3184 |
| H  | 2.2950  | -1.0935 | 4.1167  | H | -4.7832 | 1.8691  | -1.1006 |
| C  | -0.0511 | -1.3715 | 2.8880  | C | -3.8332 | 1.3561  | 0.8037  |
| H  | 0.0078  | -1.9313 | 3.8323  | H | -4.6433 | 1.7400  | 1.4419  |
| H  | -0.7485 | -1.8518 | 2.2038  | H | -2.8829 | 1.5801  | 1.2969  |
| H  | -0.3941 | -0.3551 | 3.0749  | C | -3.7248 | -0.6181 | 2.1782  |
| C  | 1.7466  | -2.7075 | 1.9723  | H | -4.4807 | -0.1951 | 2.8525  |
| H  | 1.8827  | -3.2239 | 2.9355  | H | -2.7313 | -0.3048 | 2.5012  |
| H  | 0.9267  | -3.1982 | 1.4378  | H | -3.7770 | -1.7041 | 2.2292  |
| C  | 3.0248  | -2.8295 | 1.1334  | C | -5.2903 | -0.5693 | 0.2827  |
| H  | 3.8718  | -2.3317 | 1.6174  | H | -6.0488 | -0.1961 | 0.9867  |
| H  | 3.2866  | -3.8945 | 1.1078  | H | -5.4594 | -0.0717 | -0.6743 |
| C  | 2.8667  | -2.3716 | -0.3212 | C | -5.4714 | -2.0823 | 0.0864  |
| H  | 3.6929  | -2.7588 | -0.9306 | H | -5.3115 | -2.6261 | 1.0226  |
| H  | 1.9380  | -2.7884 | -0.7251 | H | -6.5272 | -2.2401 | -0.1650 |
| C  | 2.4045  | -0.6106 | -1.9360 | C | -4.6482 | -2.6953 | -1.0550 |
| H  | 2.3281  | 0.4686  | -2.0691 | H | -4.9968 | -3.7184 | -1.2580 |
| H  | 3.1451  | -1.0260 | -2.6279 | H | -4.8023 | -2.1071 | -1.9652 |
| H  | 1.4318  | -1.0640 | -2.1398 | C | -2.8104 | -3.7068 | 0.2594  |
| C  | 4.0088  | -0.1391 | -0.1239 | H | -3.1022 | -4.7248 | -0.0287 |
| H  | 3.7610  | 0.9182  | -0.2481 | H | -3.3066 | -3.4489 | 1.1940  |
| H  | 4.1701  | -0.3039 | 0.9441  | H | -1.7315 | -3.6580 | 0.4155  |
| C  | 5.2915  | -0.4910 | -0.8928 | C | -2.4631 | -3.1334 | -2.0617 |
| H  | 5.1776  | -0.2791 | -1.9615 | H | -2.6932 | -2.4222 | -2.8543 |
| H  | 5.5112  | -1.5591 | -0.7902 | H | -2.7724 | -4.1375 | -2.3789 |
| C  | 6.4676  | 0.3425  | -0.3565 | H | -1.3881 | -3.1189 | -1.8771 |
| H  | 6.6514  | 0.0848  | 0.7074  | O | 1.5475  | 1.6585  | -0.0782 |
| H  | 6.1863  | 1.4033  | -0.3817 | C | 0.6613  | 2.6303  | 0.0864  |
| C  | 8.2714  | -1.1554 | -1.0458 | C | 0.4197  | 3.6016  | -0.9170 |
| H  | 7.5730  | -1.9017 | -1.4333 | C | -0.1046 | 2.7774  | 1.2682  |
| H  | 8.5227  | -1.4226 | -0.0008 | C | -0.5484 | 4.5992  | -0.7667 |
| H  | 9.1872  | -1.2109 | -1.6429 | H | 0.9949  | 3.5262  | -1.8324 |
| C  | 8.6937  | 1.2031  | -0.7514 | C | -1.0848 | 3.7400  | 1.4502  |
| H  | 9.0069  | 1.0921  | 0.3047  | F | 0.1204  | 1.8628  | 2.3148  |
| H  | 9.5842  | 1.1133  | -1.3822 | C | -1.2947 | 4.6378  | 0.4065  |
| H  | 8.2787  | 2.2079  | -0.8824 | H | -0.7384 | 5.3205  | -1.5520 |
|    |         |         |         | H | -1.6606 | 3.7877  | 2.3647  |
|    |         |         |         | F | -2.3094 | 5.5962  | 0.5462  |

## 5. References.

- (1) Company, A.; Palavicini, S.; Garcia-Bosch, I.; Mas-Balleste, R.; Que, L.; Rybak-Akimova, E. V.; Casella, L.; Ribas, X.; Costas, M. *Chem. Eur. J.* **2008**, *14*, 3535.
- (2) Garcia-Bosch, I.; Ribas, X.; Costas, M. *Chem.-Eur. J.* **2012**, *18*, 2113.
- (3) Palavicini, S.; Granata, A.; Monzani, E.; Casella, L. *J. Am. Chem. Soc.* **2005**, *127*, 18031.
- (4) Mirica, L. M.; Vance, M.; Rudd, D. J.; Hedman, B.; Hodgson, K. O.; Solomon, E. I.; Stack, T. D. P. *Science* **2005**, *308*, 1890.
- (5) T. Osako, K. Ohkubo, M. Taki, Y. Tachi, S. Fukuzumi, S. Itoh, *J. Am Chem. Soc.* **2003**, *125*, 11027. Note:  $\text{Cu}_2\text{O}_2$  centers are considered to act as  $1e^-/1\text{H}^+$  acceptors in the oxidation of phenols, leading to the formation of 0.5 equiv. of C-C coupling product.
- (6) Kieber-Emmons, M. T.; Ginsbach, J. W.; Wick, P. K.; Lucas, H. R.; Helton, M. E.; Lucchese, B.; Suzuki, M.; Zuberbuehler, A. D.; Karlin, K. D.; Solomon, E. I. *Angew. Chem. Int. Ed.*, **2014**, *53*, 4935.
- (7) NIST Computational Chemistry Comparison and Benchmark Database, NIST Standard Reference Database Number 101. Release 17b, September 2015, Editor: Russell D. Johnson III. <http://cccbdb.nist.gov/>
